# Supplementary material
Source: PubMed Central journal article supplement (PMC2963087)
Supplement: NIHMS236872-supplement-02.pdf [file NIHMS236872-supplement-02.pdf]

| Accession number | Genomic AT content (%) | ORF regional AU content |      |            |     |        |      | ORF regional secondary structure score |       |        |       |            |       | Genomic codon adaptation index |       |                                | ORF regional codon adaptation index |      |        |      |            |      | Number of ORFs | Genome size (bp) | Organism |                                                          |   |
|------------------|------------------------|-------------------------|------|------------|-----|--------|------|----------------------------------------|-------|--------|-------|------------|-------|--------------------------------|-------|--------------------------------|-------------------------------------|------|--------|------|------------|------|----------------|------------------|----------|----------------------------------------------------------|---|
|                  |                        | 5' ORF                  |      | ORF Middle |     | 3' ORF |      | Genomic secondary structure score      |       | 5' ORF |       | ORF Middle |       | 3' ORF                         |       | Genomic codon adaptation index |                                     |      | 5' ORF |      | ORF Middle |      |                |                  |          | 3' ORF                                                   |   |
|                  |                        | μ                       | σ    | μ          | σ   | μ      | σ    | μ                                      | σ     | μ      | σ     | μ          | σ     | μ                              | σ     | μ                              | σ                                   | μ    | σ      | μ    | σ          | μ    |                |                  |          | σ                                                        | μ |
| CP001131         | 25.16                  | 30                      | 7.69 | 25         | 4.5 | 27     | 7.95 | -1108                                  | 679.9 | -873.5 | 542.4 | -1175      | 436.9 | -1174                          | 659.6 | 0.83                           | 0.1                                 | 0.7  | 0.19   | 0.84 | 0.1        | 0.83 | 0.1            | 4436             | 5061632  | Anaeromyxobacter sp. K                                   |   |
| CP000251         | 25.09                  | 30                      | 7.91 | 25         | 4.6 | 27     | 8.12 | -1109                                  | 673.8 | -878.1 | 549.8 | -1168      | 429.3 | -1158                          | 658.6 | 0.83                           | 0.12                                | 0.69 | 0.21   | 0.85 | 0.12       | 0.84 | 0.12           | 4345             | 5013479  | Anaeromyxobacter dehalogenans 2CP-C                      |   |
| CP001359         | 25.28                  | 30                      | 7.69 | 25         | 4.5 | 27     | 7.95 | -1105                                  | 673.1 | -868.6 | 533.3 | -1162      | 435.3 | -1150                          | 650.3 | 0.82                           | 0.1                                 | 0.71 | 0.19   | 0.84 | 0.1        | 0.83 | 0.1            | 4450             | 5029329  | Anaeromyxobacter dehalogenans 2CP-1                      |   |
| CP000750         | 25.56                  | 27                      | 7.11 | 25         | 3.9 | 27     | 6.95 | -1094                                  | 624.2 | -972   | 566.9 | -1167      | 390.9 | -1152                          | 613.5 | 0.81                           | 0.13                                | 0.67 | 0.19   | 0.83 | 0.13       | 0.82 | 0.13           | 4466             | 4761183  | Kineococcus radiotolerans SRS30216                       |   |
| CP001630         | 26.29                  | 30                      | 6.56 | 26         | 3.5 | 29     | 6.58 | -1020                                  | 629.9 | -851.7 | 539.5 | -1095      | 396.6 | -991.6                         | 565.4 | 0.81                           | 0.1                                 | 0.64 | 0.19   | 0.83 | 0.1        | 0.82 | 0.1            | 6832             | 8248144  | Actinosynnema mirum DSM 43827                            |   |
| CP000769         | 26.47                  | 32                      | 7.35 | 26         | 3.8 | 27     | 7.44 | -1013                                  | 602.1 | -823.2 | 485.9 | -1079      | 343.2 | -1007                          | 552.8 | 0.8                            | 0.11                                | 0.68 | 0.2    | 0.81 | 0.11       | 0.8  | 0.11           | 4460             | 5277990  | Anaeromyxobacter sp. Fw109-5                             |   |
| CP001618         | 26.88                  | 30                      | 6.35 | 26         | 3.2 | 27     | 6.07 | -1040                                  | 576   | -904.7 | 527.2 | -1117      | 325.6 | -1034                          | 561.7 | 0.79                           | 0.07                                | 0.68 | 0.17   | 0.8  | 0.07       | 0.79 | 0.07           | 4182             | 4669183  | Beutenbergia cavernae DSM 12333                          |   |
| AM711867         | 27.34                  | 30                      | 7.43 | 27         | 3.9 | 27     | 7.17 | -983.5                                 | 565.5 | -851.1 | 543.2 | -1087      | 335   | -1058                          | 569.3 | 0.83                           | 0.11                                | 0.71 | 0.19   | 0.84 | 0.11       | 0.83 | 0.11           | 2974             | 3297891  | Clavibacter michiganensis subsp. michiganensis NCPPB 382 |   |
| CP001628         | 27.00                  | 30                      | 7.67 | 26         | 3.9 | 27     | 7.07 | -973.4                                 | 556.4 | -826.8 | 526.9 | -1058      | 339.1 | -1013                          | 563.7 | 0.79                           | 0.11                                | 0.71 | 0.18   | 0.8  | 0.11       | 0.79 | 0.11           | 2226             | 2501097  | Micrococcus luteus NCTC 2665                             |   |
| CT573213         | 27.17                  | 32                      | 7.88 | 27         | 4.2 | 29     | 7.75 | -1030                                  | 645.7 | -878   | 572.1 | -1094      | 388.4 | -989.9                         | 586.5 | 0.74                           | 0.12                                | 0.62 | 0.17   | 0.76 | 0.12       | 0.75 | 0.12           | 6582             | 7497934  | Frankia alni ACN14a                                      |   |
| AM849034         | 27.44                  | 30                      | 7.72 | 27         | 4.1 | 27     | 7.27 | -956.2                                 | 557.7 | -847.5 | 543.7 | -1026      | 345.7 | -1024                          | 556.5 | 0.82                           | 0.13                                | 0.69 | 0.21   | 0.84 | 0.13       | 0.83 | 0.13           | 2922             | 3258645  | Clavibacter michiganensis subsp. sepedonicus             |   |
| CP000943         | 28.42                  | 32                      | 8.5  | 27         | 5.4 | 29     | 8.85 | -929.2                                 | 560.2 | -795   | 483.3 | -1016      | 353.6 | -1011                          | 570.2 | 0.82                           | 0.14                                | 0.67 | 0.2    | 0.84 | 0.14       | 0.83 | 0.14           | 6556             | 7659055  | Methylobacterium sp. 4-46                                |   |
| AL645882         | 27.88                  | 32                      | 6.98 | 27         | 3.7 | 29     | 6.96 | -943.1                                 | 570.7 | -772.6 | 495.9 | -1023      | 344.2 | -934.5                         | 537   | 0.75                           | 0.1                                 | 0.59 | 0.18   | 0.77 | 0.11       | 0.76 | 0.1            | 7706             | 8667507  | Streptomyces coelicolor A3(2)                            |   |
| AP009493         | 27.77                  | 32                      | 7.34 | 27         | 3.7 | 29     | 7.11 | -920.7                                 | 553.2 | -745.4 | 488.9 | -989.1     | 323.4 | -959.1                         | 529.7 | 0.76                           | 0.1                                 | 0.59 | 0.18   | 0.78 | 0.1        | 0.77 | 0.1            | 7110             | 8545929  | Streptomyces griseus subsp. griseus NBRC 13350           |   |
| CP001643         | 27.95                  | 32                      | 7.04 | 27         | 3.5 | 29     | 6.6  | -924                                   | 538.7 | -773.4 | 496.8 | -999.2     | 305.9 | -958.9                         | 519   | 0.79                           | 0.09                                | 0.65 | 0.18   | 0.8  | 0.09       | 0.79 | 0.09           | 3055             | 3614992  | Brachyobacterium faecium DSM 4810                        |   |
| CP001001         | 28.50                  | 32                      | 7.44 | 28         | 4.3 | 29     | 7.67 | -940.8                                 | 522.2 | -777.4 | 458   | -1020      | 325.8 | -980.2                         | 521.6 | 0.78                           | 0.11                                | 0.64 | 0.19   | 0.8  | 0.11       | 0.79 | 0.11           | 5637             | 6077833  | Methylobacterium radiotolerans JCM 2831                  |   |
| CP001686         | 28.37                  | 32                      | 6.94 | 28         | 3.6 | 29     | 6.72 | -927.3                                 | 534.3 | -801.1 | 496.8 | -994.5     | 330.8 | -923.8                         | 524.3 | 0.76                           | 0.11                                | 0.67 | 0.17   | 0.77 | 0.11       | 0.76 | 0.11           | 2517             | 2785024  | Kytococcus sedentarius DSM 20547                         |   |
| AM420293         | 28.85                  | 32                      | 6.33 | 28         | 3.2 | 31     | 6.52 | -962.5                                 | 564.6 | -789.7 | 499.5 | -1061      | 345.8 | -939.5                         | 509.5 | 0.77                           | 0.1                                 | 0.64 | 0.17   | 0.79 | 0.1        | 0.78 | 0.1            | 7072             | 8212805  | Saccharopolyspora erythraea NRRL 2338                    |   |
| CP000747         | 28.65                  | 32                      | 7.16 | 28         | 3.3 | 29     | 7.09 | -915.4                                 | 506.4 | -762   | 432.8 | -993.3     | 294.3 | -908.4                         | 454.6 | 0.77                           | 0.09                                | 0.62 | 0.2    | 0.79 | 0.09       | 0.78 | 0.1            | 3523             | 3996255  | Phenyllobacterium zincinum HLK1                          |   |
| CP000386         | 29.52                  | 34                      | 8.35 | 28         | 5.1 | 31     | 8.27 | -831.3                                 | 545   | -662.6 | 519.1 | -907.3     | 370   | -798.6                         | 513.6 | 0.83                           | 0.13                                | 0.65 | 0.2    | 0.85 | 0.14       | 0.84 | 0.13           | 3139             | 3225748  | Rubrobacter xylanophilus DSM 9941                        |   |
| CP000820         | 28.85                  | 32                      | 7.74 | 28         | 4.1 | 31     | 7.72 | -948.3                                 | 600.1 | -797.2 | 520.1 | -1023      | 345.3 | -927.1                         | 559.7 | 0.73                           | 0.11                                | 0.6  | 0.17   | 0.74 | 0.11       | 0.73 | 0.11           | 7160             | 8982042  | Frankia sp. EAN1pec                                      |   |
| AP009152         | 28.84                  | 34                      | 7.79 | 28         | 3.8 | 29     | 7.23 | -914.8                                 | 532.2 | -788.1 | 496.5 | -977.7     | 317.7 | -970.7                         | 517.4 | 0.76                           | 0.11                                | 0.59 | 0.18   | 0.77 | 0.11       | 0.76 | 0.11           | 2342             | 2697540  | Kocuria rhizophila DC2201                                |   |
| CP001737         | 29.08                  | 32                      | 7.32 | 28         | 3.9 | 29     | 7.35 | -996.8                                 | 601   | -862.2 | 539.3 | -1088      | 379   | -1015                          | 590.8 | 0.74                           | 0.1                                 | 0.61 | 0.17   | 0.75 | 0.11       | 0.74 | 0.1            | 5200             | 6060298  | Nakamurella multiparita DSM 44233                        |   |
| AP006618         | 29.17                  | 34                      | 7.02 | 29         | 3.5 | 31     | 7    | -963.3                                 | 575   | -766.3 | 484.4 | -1040      | 344.3 | -927.4                         | 518.1 | 0.74                           | 0.1                                 | 0.59 | 0.17   | 0.75 | 0.1        | 0.74 | 0.1            | 5680             | 6021225  | Nocardia farcinica IFM 10152                             |   |
| BA000030         | 29.28                  | 34                      | 6.82 | 29         | 3.4 | 31     | 6.65 | -866.1                                 | 525.3 | -772.7 | 452.1 | -939.5     | 300.7 | -840.5                         | 482.9 | 0.74                           | 0.09                                | 0.59 | 0.17   | 0.76 | 0.09       | 0.75 | 0.09           | 7565             | 9025608  | Streptomyces avermitilis MA-4680                         |   |
| CP000613         | 29.54                  | 34                      | 7.76 | 29         | 4   | 29     | 7.78 | -891.2                                 | 541.8 | -711   | 464.6 | -960       | 336   | -922.9                         | 506.8 | 0.75                           | 0.1                                 | 0.61 | 0.17   | 0.76 | 0.11       | 0.75 | 0.11           | 3925             | 4355548  | Rhodospirillum centenum SW                               |   |
| CP000249         | 29.92                  | 34                      | 7.53 | 29         | 3.7 | 31     | 7.61 | -886.8                                 | 553   | -754   | 502   | -961.4     | 315.7 | -880.4                         | 523.8 | 0.71                           | 0.08                                | 0.6  | 0.15   | 0.72 | 0.09       | 0.71 | 0.08           | 4487             | 5433628  | Frankia sp. Ccl3                                         |   |
| CP001700         | 30.23                  | 34                      | 6.92 | 29         | 3.2 | 33     | 6.82 | -860.8                                 | 561.8 | -712.4 | 462   | -963.6     | 333.5 | -779.8                         | 482.3 | 0.73                           | 0.11                                | 0.6  | 0.17   | 0.75 | 0.11       | 0.74 | 0.11           | 8848             | 10467782 | Catenulispora acidiphila DSM 44928                       |   |
| CP001029         | 30.61                  | 34                      | 7.34 | 29         | 4.2 | 31     | 7.47 | -832.2                                 | 468.7 | -679.6 | 399.1 | -911.4     | 285.3 | -823                           | 431.2 | 0.75                           | 0.1                                 | 0.63 | 0.17   | 0.77 | 0.11       | 0.76 | 0.1            | 5273             | 5800441  | Methylobacterium populi BJ001                            |   |
| CP001349         | 31.14                  | 34                      | 7.73 | 30         | 5.2 | 31     | 8.46 | -811.4                                 | 464.6 | -685.8 | 402.9 | -889.2     | 294.8 | -802.9                         | 433.9 | 0.77                           | 0.13                                | 0.66 | 0.17   | 0.78 | 0.13       | 0.77 | 0.13           | 7183             | 7772460  | Methylobacterium nodulans ORS 2060                       |   |
| CP000850         | 30.48                  | 34                      | 6.97 | 30         | 3.6 | 31     | 6.99 | -897.2                                 | 553.9 | -759.2 | 477.8 | -951.6     | 350.6 | -875.3                         | 510.4 | 0.7                            | 0.08                                | 0.64 | 0.15   | 0.71 | 0.08       | 0.7  | 0.08           | 4905             | 5786361  | Salinispora arenicola CNS-205                            |   |
| AP008226         | 30.48                  | 36                      | 6.46 | 30         | 3.3 | 33     | 6.7  | -993.5                                 | 632.1 | -774.5 | 469.5 | -1082      | 395   | -900.7                         | 523.8 | 0.73                           | 0.09                                | 0.63 | 0.17   | 0.74 | 0.09       | 0.73 | 0.09           | 1954             | 1849742  | Thermus thermophilus HB8                                 |   |
| CP000667         | 30.54                  | 34                      | 7.08 | 30         | 3.4 | 31     | 7.02 | -882.7                                 | 551.9 | -735.5 | 465.7 | -944.8     | 401.5 | -865.6                         | 507.8 | 0.7                            | 0.08                                | 0.61 | 0.15   | 0.71 | 0.08       | 0.7  | 0.08           | 4524             | 5183331  | Salinispora tropica CNB-440                              |   |
| AE017221         | 30.56                  | 36                      | 6.52 | 30         | 3.3 | 33     | 6.79 | -1004                                  | 642.5 | -781.9 | 494.3 | -1090      | 400.7 | -910.7                         | 549.3 | 0.73                           | 0.08                                | 0.63 | 0.18   | 0.74 | 0.08       | 0.73 | 0.08           | 1965             | 1894877  | Thermus thermophilus HB27                                |   |
| CP001510         | 31.29                  | 34                      | 7.02 | 30         | 3.8 | 31     | 7.32 | -802.7                                 | 448.4 | -674.9 | 384.8 | -890.1     | 267.1 | -798                           | 408.2 | 0.73                           | 0.1                                 | 0.64 | 0.16   | 0.75 | 0.1        | 0.74 | 0.1            | 4891             | 5511322  | Methylobacterium extorquens AM1                          |   |
| AE019558         | 30.70                  | 34                      | 7.53 | 30         | 3.6 | 33     | 7.5  | -928                                   | 563   | -780.8 | 476.6 | -1022      | 332.3 | -868.8                         | 489.6 | 0.72                           | 0.09                                | 0.56 | 0.17   | 0.74 | 0.1        | 0.72 | 0.1            | 4346             | 4829781  | Mycobacterium avium subsp. paratuberculosis K-10         |   |
| CP000655         | 30.80                  | 36                      | 7.74 | 30         | 3.3 | 31     | 7.67 | -892.8                                 | 556.1 | -724.1 | 469.5 | -976.8     | 343.8 | -871.7                         | 509.4 | 0.73                           | 0.11                                | 0.59 | 0.18   | 0.74 | 0.11       | 0.73 | 0.11           | 3810             | 4044195  | Methylubium petroleiphilum PM1                           |   |
| AP006840         | 31.33                  | 36                      | 7.78 | 30         | 4.3 | 33     | 7.97 | -792.7                                 | 469   | -605.6 | 392.8 | -858.2     | 296.1 | -744.1                         | 408.6 | 0.73                           | 0.11                                | 0.58 | 0.18   | 0.75 | 0.11       | 0.74 | 0.11           | 3311             | 3566135  | Symbiobacterium thermophilum IAM 14863                   |   |
| CP000512         | 31.47                  | 36                      | 8.88 | 30         | 4.9 | 33     | 9.18 | -826.5                                 | 518.2 | -632.1 | 440.5 | -909.4     | 323.4 | -815.5                         | 498.8 | 0.73                           | 0.12                                | 0.58 | 0.18   | 0.75 | 0.13       | 0.74 | 0.12           | 4706             | 5352772  | Acidovorax citrulli AAC00-1                              |   |
| CP001013         | 31.10                  | 36                      | 7.61 | 30         | 4   | 33     | 7.77 | -923.7                                 | 571.7 | -679.5 | 466.3 | -1016      | 352   | -863.7                         | 489.2 | 0.74                           | 0.11                                | 0.56 | 0.17   | 0.76 | 0.11       | 0.74 | 0.11           | 4334             | 4909403  | Leptothrix cholodnii SP-6                                |   |
| CP001298         | 31.79                  | 36                      | 7.29 | 30         | 4.3 | 31     | 7.67 | -785.7                                 | 442.8 | -646.4 | 371.5 | -868.1     | 269.9 | -776.7                         | 407.3 | 0.74                           | 0.11                                | 0.63 | 0.17   | 0.75 | 0.11       | 0.74 | 0.11           | 5121             | 5777908  | Methylobacterium chloromethanicum CM4                    |   |
| CP000908         | 31.82                  | 36                      | 7.47 | 30         | 4.3 | 31     | 7.79 | -787                                   | 446.7 | -649.4 | 373.6 | -870.6     | 263.9 | -782.7                         | 406.6 | 0.74                           | 0.11                                | 0.61 | 0.17   | 0.75 | 0.11       | 0.74 | 0.11           | 4818             | 5471154  | Methylobacterium extorquens PA1                          |   |
| CP000479         | 31.01                  | 34                      | 7.32 | 30         | 3.8 | 33     | 7.61 | -921.5                                 | 556.3 | -781.7 | 474.3 | -1003      | 335.7 | -859.8                         | 495.2 | 0.72                           | 0.1                                 | 0.6  | 0.16   | 0.73 | 0.1        | 0.72 | 0.1            | 5002             | 5475491  | Mycobacterium avium 104                                  |   |
| CP000699         | 31.60                  | 36                      | 7.73 | 30         | 3.9 | 33     | 7.7  | -851.6                                 | 501.4 | -661.4 | 410.6 | -942.9     | 294.1 | -786.7                         | 427.4 | 0.76                           | 0.11                                | 0.59 | 0.19   | 0.79 | 0.11       | 0.77 | 0.11           | 4837             | 5382261  | Sphingomonas wittichii RW1                               |   |
| CP000113         | 31.11                  | 36                      | 7.08 | 31         | 3.3 | 33     | 7.05 | -784.9                                 | 449.1 | -633.1 | 394.4 | -836.1     | 265   | -781.5                         | 419.5 | 0.72                           | 0.09                                | 0.57 | 0.16   | 0.73 | 0.1        | 0.72 | 0.1            | 7216             | 9139763  | Myxococcus xanthus DK 1622                               |   |
| FP103042         | 31.91                  | 34                      | 7.2  | 31         | 4.3 | 33     | 7.91 | -780.2                                 | 441.6 | -655   | 372   | -856.5     | 273   | -775.1                         | 405.4 | 0.73                           | 0.12                                | 0.63 |        |      |            |      |                |                  |          |                                                          |   |

|          |       |    |      |    |     |    |      |        |       |        |       |        |       |        |       |      |      |      |      |      |      |      |      |      |         |                                                       |
|----------|-------|----|------|----|-----|----|------|--------|-------|--------|-------|--------|-------|--------|-------|------|------|------|------|------|------|------|------|------|---------|-------------------------------------------------------|
| CP000088 | 32.50 | 36 | 6.89 | 32 | 3.4 | 33 | 6.89 | -774.6 | 465.5 | -638.8 | 385.5 | -834.2 | 290.2 | -780.8 | 438.1 | 0.72 | 0.09 | 0.58 | 0.15 | 0.73 | 0.09 | 0.72 | 0.09 | 3105 | 3642249 | Thermobifida fusca YX                                 |
| CP000480 | 32.60 | 36 | 6.68 | 32 | 3.1 | 36 | 6.7  | -840.6 | 480.8 | -707.6 | 407.6 | -922.6 | 280.1 | -770.3 | 415.2 | 0.71 | 0.09 | 0.6  | 0.15 | 0.73 | 0.09 | 0.72 | 0.09 | 6572 | 6988209 | Mycobacterium smegmatis str. MC2 155                  |
| CP000884 | 33.52 | 41 | 8.39 | 32 | 5.2 | 36 | 8.57 | -798.8 | 494.2 | -614   | 408.2 | -885.3 | 310.3 | -761.6 | 457.9 | 0.7  | 0.12 | 0.52 | 0.17 | 0.72 | 0.13 | 0.71 | 0.13 | 6024 | 6767514 | Delftia acidovorans SPH-1                             |
| AL646052 | 32.96 | 39 | 8.21 | 32 | 4.5 | 36 | 8.35 | -815.7 | 533.2 | -623.7 | 428.2 | -898.3 | 337.6 | -783.4 | 509.4 | 0.73 | 0.12 | 0.55 | 0.16 | 0.75 | 0.13 | 0.73 | 0.12 | 3416 | 3716413 | Ralstonia solanacearum GM1000                         |
| CP001189 | 33.62 | 39 | 8.8  | 32 | 5.3 | 36 | 9.25 | -743.6 | 495.1 | -610.2 | 411.7 | -822.3 | 322.8 | -714.5 | 436.8 | 0.76 | 0.12 | 0.6  | 0.17 | 0.78 | 0.12 | 0.76 | 0.12 | 3447 | 3887492 | Glucanacetobacter diazotrophicus PAI 5                |
| CP001392 | 33.17 | 39 | 8.16 | 32 | 4.3 | 36 | 8.29 | -811.1 | 513.2 | -614.6 | 409.1 | -901.7 | 331.7 | -771.8 | 476.7 | 0.7  | 0.11 | 0.56 | 0.16 | 0.72 | 0.11 | 0.71 | 0.11 | 3468 | 3796573 | Diaphorobacter sp. TPSY                               |
| AP009384 | 32.68 | 36 | 7.77 | 32 | 3.4 | 33 | 7.48 | -756.6 | 441.5 | -625.5 | 372.6 | -815.4 | 243   | -764.5 | 390   | 0.73 | 0.09 | 0.59 | 0.18 | 0.75 | 0.09 | 0.73 | 0.09 | 4695 | 5369772 | Azorhizobium caulinodans ORS 571                      |
| CP001197 | 32.89 | 39 | 8.23 | 32 | 4.6 | 36 | 8.29 | -777.3 | 495.5 | -616.5 | 434.4 | -850   | 282.7 | -722.4 | 436.5 | 0.7  | 0.1  | 0.56 | 0.16 | 0.71 | 0.1  | 0.7  | 0.1  | 3164 | 4040304 | Desulfivibrio vulgaris str. 'Miyazaki F'              |
| CP001683 | 32.68 | 36 | 6.15 | 32 | 2.9 | 36 | 6.16 | -800.6 | 469   | -664.5 | 396.2 | -855.9 | 292.4 | -749.9 | 418.3 | 0.72 | 0.07 | 0.64 | 0.13 | 0.73 | 0.07 | 0.73 | 0.07 | 3812 | 4308349 | Saccharomonospora viridis DSM 43017                   |
| AE005673 | 32.79 | 36 | 7.15 | 32 | 3.3 | 36 | 7.18 | -780.1 | 445.8 | -652.8 | 377.3 | -840.6 | 252.1 | -752.1 | 376.9 | 0.69 | 0.12 | 0.56 | 0.18 | 0.71 | 0.12 | 0.7  | 0.12 | 3684 | 4016947 | Caulobacter crescentus CB15                           |
| CP001340 | 32.83 | 36 | 7.05 | 32 | 3.4 | 36 | 7.17 | -780   | 445.5 | -644.6 | 373.2 | -840.9 | 255.7 | -752.1 | 379.2 | 0.69 | 0.12 | 0.55 | 0.18 | 0.71 | 0.12 | 0.69 | 0.12 | 3810 | 4042929 | Caulobacter crescentus NA1000                         |
| CP000744 | 33.55 | 39 | 7.68 | 32 | 4.7 | 36 | 8.16 | -759.4 | 480.7 | -573.1 | 381.1 | -849.6 | 309.3 | -727.4 | 440.9 | 0.7  | 0.12 | 0.55 | 0.17 | 0.72 | 0.12 | 0.71 | 0.12 | 6079 | 6588339 | Pseudomonas aeruginosa PA7                            |
| AE004091 | 33.44 | 39 | 7.45 | 32 | 3.9 | 36 | 7.72 | -737.2 | 458.3 | -537.8 | 365.4 | -815   | 281.4 | -705.9 | 405.5 | 0.7  | 0.1  | 0.55 | 0.17 | 0.71 | 0.1  | 0.7  | 0.1  | 5551 | 6264404 | Pseudomonas aeruginosa PAO1                           |
| CP000359 | 33.36 | 39 | 7.48 | 32 | 3.8 | 33 | 7.32 | -705   | 417.3 | -585.7 | 357   | -764.7 | 247.9 | -673.1 | 384.3 | 0.67 | 0.06 | 0.58 | 0.14 | 0.68 | 0.07 | 0.67 | 0.06 | 2327 | 2467205 | Deinococcus geothermalis DSM 11300                    |
| CP000438 | 33.71 | 41 | 7.49 | 32 | 4.3 | 36 | 7.99 | -750.6 | 472.7 | -566.1 | 381.7 | -833.4 | 296.9 | -727.1 | 424.7 | 0.7  | 0.11 | 0.55 | 0.17 | 0.72 | 0.11 | 0.7  | 0.11 | 5858 | 6537648 | Pseudomonas aeruginosa UCBPP-PA14                     |
| FM209186 | 33.70 | 39 | 7.4  | 32 | 4.1 | 36 | 7.76 | -752.6 | 469.7 | -569.3 | 379.1 | -829.5 | 292.1 | -727.7 | 422.2 | 0.7  | 0.11 | 0.55 | 0.17 | 0.71 | 0.11 | 0.7  | 0.11 | 5914 | 6601757 | Pseudomonas aeruginosa LESB58                         |
| CP000539 | 33.83 | 41 | 8.44 | 32 | 4.7 | 36 | 8.46 | -784.9 | 497.8 | -620   | 393.5 | -869.9 | 319.1 | -733.2 | 454.4 | 0.7  | 0.12 | 0.55 | 0.16 | 0.71 | 0.12 | 0.7  | 0.12 | 3998 | 4448856 | Acidovorax sp. JS42                                   |
| CP000159 | 33.78 | 39 | 8.19 | 33 | 4.2 | 36 | 7.9  | -688.6 | 417.8 | -529.1 | 360.1 | -750.9 | 245.3 | -659.4 | 374.4 | 0.74 | 0.1  | 0.58 | 0.17 | 0.75 | 0.1  | 0.74 | 0.1  | 2778 | 3551823 | Salinibacter ruber DSM 13855                          |
| CP001111 | 33.70 | 39 | 6.98 | 33 | 3.1 | 36 | 6.96 | -794.3 | 483.1 | -620.6 | 401.7 | -868.8 | 296.6 | -790.1 | 434.2 | 0.69 | 0.1  | 0.56 | 0.16 | 0.71 | 0.1  | 0.7  | 0.1  | 4027 | 4573969 | Stenotrophomonas maltophilia R551-3                   |
| AM743169 | 33.68 | 39 | 7.28 | 33 | 3.6 | 36 | 7.21 | -796.8 | 485   | -631.6 | 410.7 | -869.2 | 298   | -770.9 | 435   | 0.69 | 0.12 | 0.56 | 0.17 | 0.7  | 0.12 | 0.69 | 0.12 | 4376 | 4851126 | Stenotrophomonas maltophilia K279a                    |
| CP001157 | 34.32 | 41 | 8.25 | 33 | 5.3 | 36 | 8.7  | -734.6 | 501.1 | -556   | 366.3 | -814   | 302.8 | -688.6 | 420.8 | 0.69 | 0.12 | 0.57 | 0.16 | 0.71 | 0.13 | 0.7  | 0.12 | 4769 | 5365318 | Azotobacter vinelandii DJ                             |
| CP001341 | 33.72 | 39 | 7.37 | 33 | 3.3 | 36 | 7.27 | -729.6 | 434   | -592   | 387   | -790.3 | 250.3 | -715.1 | 411.8 | 0.68 | 0.08 | 0.57 | 0.14 | 0.69 | 0.08 | 0.68 | 0.08 | 3869 | 4395357 | Arthrobacter chlorophenicus A6                        |
| CP000481 | 33.09 | 34 | 6.93 | 33 | 3.6 | 33 | 7.24 | -767   | 471.2 | -711.1 | 430.3 | -820.4 | 272.9 | -769.1 | 449.1 | 0.71 | 0.06 | 0.65 | 0.12 | 0.71 | 0.06 | 0.71 | 0.06 | 2154 | 2443540 | Acidothermus cellulolyticus 11B                       |
| CP000250 | 33.96 | 39 | 7.33 | 33 | 3.6 | 36 | 7.72 | -793.6 | 486.5 | -618   | 379.8 | -875.8 | 294   | -743.1 | 425.9 | 0.73 | 0.1  | 0.57 | 0.17 | 0.75 | 0.1  | 0.74 | 0.1  | 4669 | 5331656 | Rhodopseudomonas palustris HaA2                       |
| CP001339 | 34.94 | 41 | 7.75 | 33 | 4.7 | 38 | 7.92 | -695.9 | 421.9 | -540.7 | 366.9 | -756.7 | 266.6 | -605.7 | 356.6 | 0.69 | 0.12 | 0.57 | 0.16 | 0.71 | 0.13 | 0.7  | 0.12 | 3261 | 3464554 | Thioalkalivibrio sp. HL-EbGR7                         |
| CP000116 | 33.93 | 41 | 8.15 | 33 | 4.2 | 36 | 8.36 | -754.4 | 456.9 | -595.1 | 388.3 | -838.7 | 277.9 | -700.2 | 406.6 | 0.73 | 0.1  | 0.6  | 0.17 | 0.74 | 0.11 | 0.73 | 0.1  | 2819 | 2909809 | Thiobacillus denitrificans ATCC 25259                 |
| AM902716 | 34.52 | 41 | 8.48 | 33 | 4.6 | 36 | 8.95 | -761.4 | 505.1 | -586.3 | 380   | -845.5 | 320.7 | -707   | 470.3 | 0.7  | 0.11 | 0.56 | 0.15 | 0.72 | 0.11 | 0.7  | 0.11 | 5015 | 5287950 | Bordetella petrii                                     |
| AE016825 | 35.17 | 43 | 9.22 | 33 | 6.3 | 38 | 9.75 | -746.7 | 516.8 | -557.8 | 398.3 | -829.9 | 346.2 | -700.9 | 451.3 | 0.71 | 0.14 | 0.54 | 0.17 | 0.73 | 0.15 | 0.71 | 0.15 | 4405 | 4751080 | Chromobacterium violaceum ATCC 12472                  |
| CP000830 | 33.98 | 41 | 7.97 | 33 | 4.1 | 36 | 8.27 | -694.2 | 427   | -567.8 | 370.5 | -739.4 | 267.8 | -682.1 | 413.5 | 0.74 | 0.09 | 0.61 | 0.16 | 0.75 | 0.1  | 0.74 | 0.09 | 3572 | 3789584 | Dinoroseobacter shibae DFL 12                         |
| CU234118 | 34.49 | 39 | 7.18 | 33 | 3.4 | 36 | 7.34 | -728.9 | 425.6 | -589.7 | 352   | -799.6 | 249.1 | -688.5 | 373.2 | 0.73 | 0.1  | 0.59 | 0.16 | 0.75 | 0.1  | 0.73 | 0.1  | 6662 | 7456587 | Bradyrhizobium sp. ORS278                             |
| AP007255 | 34.91 | 39 | 7.68 | 33 | 4.3 | 38 | 7.89 | -719.1 | 440.1 | -606.6 | 361.3 | -792.6 | 266.6 | -673.4 | 368.9 | 0.7  | 0.12 | 0.57 | 0.18 | 0.72 | 0.12 | 0.71 | 0.12 | 4500 | 4967148 | Magnetospirillum magneticum AMB-1                     |
| CP000454 | 34.53 | 41 | 7.48 | 34 | 3.2 | 36 | 7.44 | -698.2 | 415   | -562.8 | 384.5 | -758.9 | 234.4 | -671.5 | 400.2 | 0.68 | 0.08 | 0.56 | 0.14 | 0.69 | 0.08 | 0.68 | 0.08 | 4141 | 4698945 | Arthrobacter sp. FB24                                 |
| CP000542 | 34.72 | 41 | 8.68 | 34 | 4.8 | 38 | 8.71 | -761.5 | 503.5 | -620.5 | 429.1 | -838   | 308.6 | -697.8 | 427.8 | 0.69 | 0.11 | 0.58 | 0.15 | 0.7  | 0.11 | 0.69 | 0.11 | 4901 | 5566749 | Verminephrobacter eiseniae EF01-2                     |
| CP000230 | 34.55 | 39 | 8.61 | 34 | 4.4 | 36 | 8.63 | -746   | 465.1 | -591.5 | 380.8 | -812   | 283.9 | -722.2 | 406.6 | 0.71 | 0.08 | 0.58 | 0.16 | 0.72 | 0.09 | 0.71 | 0.08 | 3786 | 4352825 | Rhodospirillum rubrum ATCC 11170                      |
| AE008922 | 34.93 | 39 | 7.72 | 34 | 4.1 | 36 | 7.76 | -769.5 | 500.5 | -622.1 | 434.9 | -843.1 | 307.4 | -740.3 | 477.2 | 0.69 | 0.1  | 0.56 | 0.16 | 0.71 | 0.1  | 0.7  | 0.1  | 4147 | 5076188 | Xanthomonas campestris pv. campestris str. ATCC 33913 |
| CP000356 | 34.50 | 39 | 7.78 | 34 | 3.9 | 36 | 8.01 | -738.8 | 445.8 | -619.5 | 389.8 | -806.5 | 266.1 | -687   | 399.3 | 0.72 | 0.09 | 0.63 | 0.16 | 0.74 | 0.1  | 0.73 | 0.09 | 3163 | 3345170 | Sphingopyxis alaskensis RB2256                        |
| CP000050 | 35.04 | 39 | 7.82 | 34 | 4.3 | 36 | 7.78 | -764.2 | 507.1 | -610.9 | 449.4 | -847.3 | 325.8 | -738.5 | 469.7 | 0.69 | 0.1  | 0.55 | 0.16 | 0.71 | 0.11 | 0.7  | 0.11 | 4230 | 5148708 | Xanthomonas campestris pv. campestris str. 8004       |
| AM920689 | 34.96 | 39 | 7.81 | 34 | 4.6 | 36 | 8.11 | -776.9 | 509.4 | -609.7 | 437.2 | -847.8 | 327.7 | -741.8 | 467.9 | 0.69 | 0.11 | 0.55 | 0.16 | 0.7  | 0.12 | 0.69 | 0.11 | 4413 | 5079002 | Xanthomonas campestris pv. campestris                 |
| CP000680 | 35.32 | 41 | 7.1  | 34 | 4.2 | 38 | 7.45 | -714.8 | 443.3 | -521.7 | 348   | -777.1 | 276.8 | -664.8 | 383.2 | 0.68 | 0.11 | 0.54 | 0.16 | 0.7  | 0.11 | 0.68 | 0.11 | 4586 | 5072807 | Pseudomonas mendocina ymp                             |
| CP000301 | 35.04 | 41 | 7.49 | 34 | 4   | 36 | 8.08 | -763.1 | 487.6 | -593.8 | 391.1 | -856.4 | 300.2 | -719.9 | 420.9 | 0.73 | 0.1  | 0.56 | 0.15 | 0.75 | 0.1  | 0.73 | 0.1  | 4872 | 5513844 | Rhodopseudomonas palustris BisB18                     |
| BX571963 | 34.96 | 41 | 7.02 | 34 | 3.2 | 36 | 7.53 | -752.8 | 448.7 | -619.7 | 367.7 | -829.4 | 265.8 | -726.7 | 385   | 0.71 | 0.09 | 0.57 | 0.16 | 0.73 | 0.09 | 0.71 | 0.09 | 4797 | 5459213 | Rhodopseudomonas palustris CGA009                     |
| CP000854 | 34.27 | 39 | 7.09 | 34 | 3.4 | 36 | 7.33 | -759.4 | 535.2 | -646   | 384.9 | -817.5 | 295   | -717.5 | 420.1 | 0.68 | 0.06 | 0.6  | 0.13 | 0.69 | 0.06 | 0.68 | 0.06 | 5406 | 6636827 | Mycobacterium marinum M                               |
| CP000248 | 34.85 | 39 | 6.68 | 34 | 3.3 | 36 | 6.95 | -679.9 | 386.6 | -571.9 | 334.3 | -736.1 | 229.2 | -656.2 | 343.2 | 0.71 | 0.09 | 0.62 | 0.15 | 0.72 | 0.09 | 0.71 | 0.09 | 3321 | 3561584 | Novosphingobium aromaticivorans DSM 12444             |
| CP001096 | 35.14 | 41 | 6.98 | 34 | 3.5 | 36 | 7.57 | -744.6 | 447.2 | -608   | 363.1 | -821.5 | 272.7 | -717.1 | 387.8 | 0.71 | 0.09 | 0.58 | 0.15 | 0.73 | 0.1  | 0.72 | 0.1  | 5195 | 5744041 | Rhodopseudomonas palustris TIE-1                      |
| AL123456 | 34.39 | 39 | 7.13 | 34 | 3.5 | 36 | 7    | -766   | 521.4 | -661.8 | 395.9 | -825.4 | 302.2 | -713.9 | 404.4 | 0.66 | 0.06 | 0.61 | 0.12 | 0.67 | 0.06 | 0.67 | 0.06 | 3979 | 4411532 | Mycobacterium tuberculosis H37Rv                      |
| CP000717 | 34.38 | 39 | 7.16 | 34 | 3.5 | 36 | 7.04 | -766.3 | 522.3 | -654.4 | 397.8 | -820.5 | 301.1 | -714.1 | 405   | 0.66 | 0.06 | 0.61 | 0.12 | 0.67 | 0.06 | 0.67 | 0.06 | 3938 | 4424435 | Mycobacterium tuberculosis F11                        |
| CR555306 | 34.88 | 41 | 7.92 | 34 | 4.4 | 38 | 8.18 | -712.8 | 434.1 | -565.6 | 360   | -771.3 | 272.5 | -644.3 | 378.2 | 0.7  | 0.12 | 0.59 | 0.15 | 0.71 | 0.12 | 0.71 | 0.12 | 4072 | 4296230 | Aromatoleum aromaticum EbN1                           |
| BX248333 | 34.37 | 39 | 7.12 | 34 | 3.5 | 36 | 7.02 | -767.1 | 525.4 |        |       |        |       |        |       |      |      |      |      |      |      |      |      |      |         |                                                       |

|          |       |    |      |    |     |    |      |        |       |        |       |        |       |        |       |      |      |      |      |      |      |      |      |      |         |                                                               |
|----------|-------|----|------|----|-----|----|------|--------|-------|--------|-------|--------|-------|--------|-------|------|------|------|------|------|------|------|------|------|---------|---------------------------------------------------------------|
| CP000967 | 36.37 | 39 | 7.72 | 35 | 3.8 | 38 | 7.52 | -705.8 | 461.3 | -596.1 | 404.8 | -767.2 | 291.8 | -655.1 | 415.1 | 0.67 | 0.09 | 0.61 | 0.15 | 0.69 | 0.09 | 0.68 | 0.09 | 4620 | 5240075 | Xanthomonas oryzae pv. oryzae PXO99A                          |
| CP000076 | 36.70 | 43 | 7.63 | 35 | 4   | 40 | 7.72 | -663.5 | 421.3 | -493.4 | 329.8 | -723.1 | 262.7 | -624   | 366.5 | 0.67 | 0.1  | 0.51 | 0.16 | 0.69 | 0.1  | 0.68 | 0.1  | 6104 | 7074893 | Pseudomonas fluorescens Pf-5                                  |
| CP001715 | 35.89 | 43 | 7.67 | 35 | 3.8 | 38 | 7.75 | -679.7 | 424.1 | -541.6 | 368.3 | -728   | 242.1 | -660.9 | 393.1 | 0.67 | 0.07 | 0.6  | 0.13 | 0.68 | 0.07 | 0.68 | 0.07 | 4276 | 5058518 | Candidatus Accumulobacter phosphatis clade IIA str. UW-1      |
| CP001114 | 36.61 | 41 | 7.63 | 35 | 3.9 | 38 | 7.46 | -633.7 | 369.6 | -527.2 | 321.7 | -686.7 | 227.6 | -614.4 | 321.1 | 0.66 | 0.08 | 0.59 | 0.13 | 0.67 | 0.08 | 0.66 | 0.08 | 2585 | 2819842 | Deinococcus deserti VCD115                                    |
| AE017282 | 36.42 | 43 | 8.04 | 35 | 3.8 | 38 | 7.88 | -638   | 391   | -620.9 | 339.1 | -685.5 | 233.3 | -577.3 | 343.9 | 0.7  | 0.08 | 0.61 | 0.15 | 0.71 | 0.09 | 0.7  | 0.08 | 2931 | 3304561 | Methylococcus capsulatus str. Bath                            |
| AE013598 | 36.31 | 39 | 7.78 | 36 | 3.6 | 38 | 7.53 | -715.3 | 462.4 | -610.5 | 392.1 | -777.5 | 284   | -665.1 | 419.2 | 0.67 | 0.09 | 0.55 | 0.15 | 0.69 | 0.09 | 0.68 | 0.09 | 4432 | 4941439 | Xanthomonas oryzae pv. oryzae KACC10331                       |
| CP000529 | 37.47 | 46 | 8.82 | 35 | 5.5 | 40 | 9.13 | -679.9 | 442.6 | -507.3 | 349.3 | -756.7 | 272.8 | -598.1 | 370   | 0.69 | 0.11 | 0.54 | 0.15 | 0.71 | 0.11 | 0.7  | 0.11 | 4077 | 4410291 | Polaromonas naphthalenivorans CJ2                             |
| CP001280 | 36.92 | 41 | 8.11 | 36 | 4.1 | 38 | 8.64 | -655   | 384.8 | -546.5 | 326   | -717.4 | 219.9 | -646   | 349.6 | 0.71 | 0.08 | 0.62 | 0.14 | 0.72 | 0.08 | 0.72 | 0.08 | 3790 | 4305430 | Methylocella stivalensis BL2                                  |
| BA000035 | 36.86 | 43 | 7.68 | 36 | 4.3 | 40 | 7.56 | -674.4 | 407.3 | -550.7 | 353.3 | -732.6 | 243.4 | -632.5 | 371   | 0.7  | 0.11 | 0.53 | 0.15 | 0.71 | 0.11 | 0.7  | 0.11 | 2935 | 3147090 | Corynebacterium efficiens YS-314                              |
| CP001389 | 36.97 | 43 | 7.07 | 36 | 3.3 | 40 | 7.4  | -629.5 | 362.1 | -492.3 | 276.2 | -683.7 | 198.8 | -588.3 | 307.9 | 0.7  | 0.09 | 0.58 | 0.15 | 0.72 | 0.09 | 0.71 | 0.09 | 3615 | 3925702 | Rhizobium sp. NGR234                                          |
| CP001154 | 37.65 | 43 | 8.5  | 36 | 6.2 | 38 | 9.08 | -672.8 | 451.8 | -522.2 | 345.6 | -734.1 | 314.5 | -622.1 | 394.4 | 0.66 | 0.11 | 0.56 | 0.15 | 0.67 | 0.11 | 0.67 | 0.11 | 3074 | 3169329 | Laribacter hongkongensis HLHK9                                |
| CP000157 | 36.93 | 41 | 7.28 | 36 | 3.6 | 38 | 7.38 | -632.3 | 362.6 | -546.2 | 320.8 | -690.6 | 208.5 | -590.7 | 314.4 | 0.72 | 0.08 | 0.65 | 0.13 | 0.73 | 0.09 | 0.72 | 0.08 | 2956 | 3052398 | Erythrobacter litoralis HTCC2594                              |
| CP000527 | 36.99 | 43 | 7.48 | 36 | 4.2 | 40 | 7.57 | -642.5 | 402.1 | -530.5 | 353.2 | -681.7 | 250.8 | -606.1 | 378   | 0.7  | 0.09 | 0.63 | 0.14 | 0.71 | 0.09 | 0.7  | 0.09 | 2932 | 3462887 | Desulfovibrio vulgaris DP4                                    |
| ALS91688 | 37.27 | 43 | 6.86 | 36 | 3   | 40 | 7.26 | -612.7 | 342.2 | -492   | 277.4 | -660.6 | 181.9 | -585.4 | 297.1 | 0.71 | 0.07 | 0.61 | 0.13 | 0.72 | 0.08 | 0.71 | 0.07 | 3344 | 3654135 | Sinorhizobium meliloti 1021                                   |
| CP000462 | 38.45 | 46 | 8.59 | 36 | 5.3 | 40 | 8.9  | -639.1 | 401.6 | -479.5 | 301.8 | -712   | 247.1 | -616.2 | 356.5 | 0.69 | 0.1  | 0.5  | 0.15 | 0.71 | 0.1  | 0.69 | 0.1  | 4072 | 4744448 | Aeromonas hydrophila subsp. hydrophila ATCC 7966              |
| AE017285 | 36.86 | 43 | 7.8  | 36 | 5.2 | 40 | 7.95 | -642.9 | 396.8 | -528.4 | 346.5 | -685.1 | 244.9 | -593.1 | 362.5 | 0.69 | 0.1  | 0.63 | 0.14 | 0.7  | 0.1  | 0.69 | 0.1  | 3199 | 3570858 | Desulfovibrio vulgaris str. Hildenborough                     |
| CP001275 | 36.35 | 39 | 6.16 | 36 | 3.4 | 38 | 6.32 | -631.8 | 370.3 | -541.9 | 334   | -666.5 | 226.9 | -593.4 | 329.2 | 0.72 | 0.05 | 0.7  | 0.11 | 0.72 | 0.06 | 0.72 | 0.06 | 1836 | 2003006 | Thermomicrobium roseum DSM 5159                               |
| CP000316 | 37.53 | 46 | 8.07 | 36 | 4.2 | 40 | 8.5  | -659.7 | 409.8 | -519.1 | 337.7 | -721.1 | 247.6 | -597.5 | 360.4 | 0.68 | 0.09 | 0.56 | 0.14 | 0.69 | 0.09 | 0.68 | 0.09 | 4810 | 5200264 | Polaromonas sp. JS666                                         |
| CP001196 | 37.60 | 43 | 7.43 | 36 | 3.7 | 40 | 7.72 | -637.1 | 382.6 | -526.7 | 328.8 | -696.7 | 234.3 | -601.4 | 332.1 | 0.71 | 0.09 | 0.6  | 0.14 | 0.72 | 0.09 | 0.71 | 0.09 | 3542 | 3745629 | Oligotropha carboxidovorans OM5                               |
| CP000449 | 37.27 | 43 | 7.07 | 36 | 3.4 | 38 | 7.4  | -628.1 | 365.5 | -517.6 | 317.1 | -676.3 | 212.8 | -603.7 | 334.7 | 0.68 | 0.08 | 0.6  | 0.13 | 0.69 | 0.08 | 0.68 | 0.08 | 3061 | 3368780 | Maricaulis maris MCS10                                        |
| CP001727 | 37.67 | 43 | 7.59 | 36 | 5.2 | 40 | 8.36 | -610.6 | 369.1 | -488.7 | 317.8 | -654.4 | 230.3 | -569.3 | 335.6 | 0.7  | 0.09 | 0.63 | 0.13 | 0.71 | 0.09 | 0.7  | 0.09 | 2835 | 3018755 | Alicyclobacillus acidocaldarius subsp. acidocaldarius DSM 446 |
| CP000926 | 38.06 | 43 | 7.1  | 36 | 4.1 | 40 | 7.32 | -651.5 | 415.3 | -505.1 | 336.3 | -709.4 | 263.7 | -597.8 | 350.6 | 0.66 | 0.09 | 0.57 | 0.14 | 0.67 | 0.1  | 0.66 | 0.1  | 5393 | 6078430 | Pseudomonas putida GB-1                                       |
| CP000774 | 37.67 | 43 | 7.37 | 37 | 3.8 | 40 | 7.53 | -627.3 | 369.2 | -538.6 | 328.7 | -679   | 215.3 | -599.2 | 336.8 | 0.73 | 0.09 | 0.64 | 0.14 | 0.74 | 0.09 | 0.73 | 0.09 | 3630 | 3914745 | Parvibaculum lavamentivorans DS-1                             |
| BA000045 | 38.00 | 43 | 8.06 | 36 | 4.9 | 40 | 8.58 | -629.4 | 397.2 | -487   | 321.4 | -693.2 | 239   | -587.1 | 346.9 | 0.69 | 0.08 | 0.6  | 0.14 | 0.7  | 0.09 | 0.69 | 0.08 | 4408 | 4659019 | Gloeobacter violaceus PCC 7421                                |
| CP000115 | 37.95 | 43 | 7.31 | 37 | 3.7 | 40 | 7.79 | -611.5 | 365.7 | -521   | 313.5 | -665.1 | 213.7 | -575.2 | 320.9 | 0.69 | 0.07 | 0.6  | 0.13 | 0.7  | 0.08 | 0.69 | 0.08 | 3118 | 3402093 | Nitrobacter winogradskyi Nb-255                               |
| AE015451 | 38.48 | 43 | 7.32 | 37 | 4.1 | 40 | 7.35 | -648.3 | 407.7 | -513.7 | 330.7 | -713.8 | 256.2 | -595.3 | 354.6 | 0.66 | 0.09 | 0.56 | 0.14 | 0.67 | 0.1  | 0.66 | 0.09 | 5280 | 6181863 | Pseudomonas putida KT2440                                     |
| AP008957 | 37.69 | 41 | 6.49 | 37 | 2.7 | 40 | 6.39 | -634.7 | 369.7 | -540.7 | 319.9 | -683.2 | 218.8 | -590.4 | 333   | 0.7  | 0.06 | 0.63 | 0.11 | 0.71 | 0.06 | 0.7  | 0.06 | 6028 | 6516310 | Rhodococcus erythropolis PR4                                  |
| CP000712 | 38.14 | 43 | 7.25 | 37 | 3.8 | 40 | 7.25 | -642.9 | 401.5 | -496.7 | 327.8 | -691.3 | 247.1 | -591.3 | 354.4 | 0.66 | 0.09 | 0.56 | 0.14 | 0.67 | 0.09 | 0.66 | 0.09 | 5231 | 5959964 | Pseudomonas putida F1                                         |
| CP000319 | 38.29 | 43 | 7.47 | 37 | 4.2 | 40 | 7.9  | -619   | 380.8 | -524.6 | 315.1 | -678.1 | 232.6 | -585.4 | 329.8 | 0.69 | 0.09 | 0.6  | 0.13 | 0.71 | 0.09 | 0.7  | 0.09 | 3792 | 4406967 | Nitrobacter hamburgensis X14                                  |
| CP000264 | 37.67 | 43 | 7.44 | 37 | 3.5 | 40 | 7.35 | -613.6 | 357.7 | -516.1 | 312.3 | -657.4 | 210.3 | -583.5 | 323.2 | 0.67 | 0.07 | 0.65 | 0.13 | 0.73 | 0.07 | 0.72 | 0.07 | 4209 | 4317977 | Jannaschia sp. CCS1                                           |
| CP000474 | 37.66 | 41 | 7.11 | 37 | 2.7 | 40 | 6.83 | -610.1 | 364.1 | -527.5 | 336.6 | -658.9 | 201.5 | -575.4 | 341.8 | 0.68 | 0.06 | 0.62 | 0.12 | 0.68 | 0.07 | 0.68 | 0.07 | 4003 | 4597686 | Arthrobacter aureus TC1                                       |
| CR931997 | 38.60 | 43 | 7.33 | 37 | 4   | 40 | 7.68 | -584.6 | 380.2 | -485.5 | 316.5 | -633   | 228.4 | -549.3 | 369.8 | 0.65 | 0.09 | 0.56 | 0.13 | 0.66 | 0.1  | 0.65 | 0.09 | 2084 | 2462499 | Corynebacterium jeikeium K411                                 |
| CP001191 | 38.47 | 46 | 6.89 | 37 | 3.4 | 40 | 7.34 | -582.4 | 349.7 | -461   | 270.5 | -633.4 | 197.7 | -541.6 | 296.8 | 0.7  | 0.08 | 0.58 | 0.14 | 0.71 | 0.09 | 0.7  | 0.08 | 4303 | 4537948 | Rhizobium leguminosarum bv. trifolii WSM2304                  |
| CP000158 | 38.07 | 43 | 7.47 | 37 | 3.8 | 40 | 7.75 | -582.9 | 357.7 | -505.5 | 306.3 | -627.6 | 215   | -576.8 | 326.5 | 0.72 | 0.08 | 0.64 | 0.13 | 0.73 | 0.08 | 0.73 | 0.08 | 3462 | 3705021 | Hyphomonas neptunia ATCC 15444                                |
| CP000949 | 38.56 | 43 | 7.18 | 37 | 4.1 | 40 | 7.4  | -629.5 | 393.7 | -505.5 | 325.7 | -685.5 | 251.3 | -580.5 | 339.8 | 0.66 | 0.09 | 0.58 | 0.14 | 0.67 | 0.09 | 0.66 | 0.09 | 5167 | 5774330 | Pseudomonas putida W619                                       |
| CP001074 | 38.33 | 43 | 7.05 | 37 | 3.6 | 40 | 7.58 | -587.3 | 351   | -469.8 | 277.2 | -635.4 | 199.1 | -544.8 | 300.9 | 0.7  | 0.09 | 0.58 | 0.14 | 0.71 | 0.1  | 0.7  | 0.09 | 4337 | 4513324 | Rhizobium etli CIAT 652                                       |
| CP000473 | 38.10 | 43 | 7.76 | 37 | 3.5 | 42 | 7.99 | -557   | 344   | -468.8 | 274.3 | -600.4 | 206.5 | -498.2 | 306.5 | 0.7  | 0.08 | 0.58 | 0.13 | 0.71 | 0.08 | 0.7  | 0.08 | 7821 | 9965640 | Candidatus Solibacter usitatus Ellin6076                      |
| AM167904 | 38.42 | 46 | 7.75 | 37 | 3.7 | 40 | 8.08 | -612.7 | 387.4 | -489.9 | 316.6 | -662.8 | 244.8 | -598.7 | 359.5 | 0.69 | 0.07 | 0.62 | 0.13 | 0.7  | 0.08 | 0.69 | 0.07 | 3344 | 3732255 | Bordetella avium 197N                                         |
| CP000860 | 39.15 | 46 | 8.46 | 37 | 5.3 | 42 | 8.94 | -580.6 | 368.7 | -454.4 | 309.3 | -630.2 | 241   | -496.1 | 320.1 | 0.68 | 0.08 | 0.6  | 0.12 | 0.69 | 0.08 | 0.68 | 0.08 | 2148 | 2349476 | Candidatus Desulfuridus auxaxiator MP104C                     |
| CP000133 | 38.73 | 46 | 7.19 | 37 | 3.3 | 40 | 7.5  | -572.9 | 342.2 | -475   | 275.9 | -623.7 | 185.8 | -540.4 | 292.4 | 0.7  | 0.08 | 0.59 | 0.14 | 0.71 | 0.08 | 0.7  | 0.08 | 4030 | 4381608 | Rhizobium etli CFN 42                                         |
| CP001622 | 38.91 | 46 | 6.85 | 37 | 3.3 | 40 | 7.28 | -569.3 | 337.4 | -455   | 263   | -622.1 | 191.4 | -530.1 | 282.1 | 0.7  | 0.08 | 0.59 | 0.14 | 0.71 | 0.08 | 0.7  | 0.08 | 4511 | 4767043 | Rhizobium leguminosarum bv. trifolii WSM1325                  |
| CP000009 | 38.93 | 43 | 7.41 | 38 | 4   | 40 | 7.78 | -587.8 | 360.9 | -524.9 | 312.7 | -633.2 | 228.8 | -600.3 | 338.6 | 0.71 | 0.08 | 0.63 | 0.13 | 0.72 | 0.08 | 0.71 | 0.08 | 2428 | 2702173 | Gluconobacter oxydans 621H                                    |
| AM236080 | 38.91 | 46 | 7    | 38 | 3.4 | 40 | 7.31 | -571.4 | 336.2 | -465.9 | 268.6 | -622.8 | 191.2 | -529.7 | 282.9 | 0.7  | 0.08 | 0.58 | 0.14 | 0.71 | 0.09 | 0.7  | 0.08 | 4694 | 5057142 | Rhizobium leguminosarum bv. viciae 3841                       |
| CP000738 | 38.50 | 46 | 6.84 | 38 | 3   | 40 | 7.29 | -578   | 321.4 | -472.8 | 263.8 | -622.4 | 174.6 | -555.3 | 287   | 0.7  | 0.06 | 0.63 | 0.13 | 0.71 | 0.07 | 0.71 | 0.06 | 3510 | 3781904 | Sinorhizobium medicae WSM419                                  |
| CP001661 | 39.53 | 50 | 7.65 | 37 | 5.1 | 42 | 8.35 | -569.7 | 381.4 | -407   | 275.8 | -625.2 | 215.2 | -498.9 | 321.9 | 0.71 | 0.1  | 0.55 | 0.14 | 0.73 | 0.11 | 0.71 | 0.11 | 4047 | 4745806 | Geobacter sp. M21                                             |
| AM181176 | 39.50 | 46 | 7.43 | 38 | 4.2 | 42 | 7.44 | -613.7 | 390.2 | -463.1 | 301.7 | -667   | 238.2 | -547.8 | 315   | 0.67 | 0.09 | 0.56 | 0.14 | 0.68 | 0.1  | 0.68 | 0.09 | 5900 | 6722539 | Pseudomonas fluorescens SBW25                                 |
| CP000094 | 39.48 | 46 | 7.28 | 38 | 4.2 | 42 | 7.49 | -600.2 | 394.6 | -463.3 | 313.4 | -657.6 | 245   | -559.1 | 319.6 | 0.68 | 0.1  | 0.57 | 0.14 | 0.69 | 0.1  | 0.68 | 0.1  | 5711 | 6438405 | Pseudomonas fluorescens Pf0-1                                 |
| CP001124 | 39.73 | 50 | 7.48 | 38 | 4.8 | 44 | 8.34 | -554.2 | 368.6 |        |       |        |       |        |       |      |      |      |      |      |      |      |      |      |         |                                                               |

|          |       |    |      |    |     |    |      |        |       |        |       |        |       |        |       |      |      |      |      |      |      |      |      |      |         |                                                                                |
|----------|-------|----|------|----|-----|----|------|--------|-------|--------|-------|--------|-------|--------|-------|------|------|------|------|------|------|------|------|------|---------|--------------------------------------------------------------------------------|
| CP000075 | 40.77 | 48 | 7.27 | 39 | 4.2 | 42 | 7.48 | -565.4 | 345.4 | -444   | 276.4 | -611.9 | 203.1 | -525.3 | 295.3 | 0.68 | 0.08 | 0.58 | 0.13 | 0.69 | 0.08 | 0.68 | 0.08 | 5083 | 6093698 | <i>Pseudomonas syringae</i> pv. <i>syringae</i> B728a                          |
| AE017283 | 39.99 | 43 | 6.62 | 39 | 3.4 | 40 | 6.76 | -566.3 | 345.4 | -533.6 | 321   | -614.1 | 218   | -572.6 | 318.2 | 0.7  | 0.06 | 0.67 | 0.1  | 0.7  | 0.06 | 0.7  | 0.06 | 2292 | 2560265 | <i>Propionibacterium acnes</i> KPA171202                                       |
| CP000644 | 41.49 | 48 | 8    | 39 | 5.4 | 44 | 8.49 | -561.7 | 341.3 | -442.4 | 275.6 | -615.4 | 210.6 | -526   | 303.8 | 0.68 | 0.09 | 0.57 | 0.13 | 0.69 | 0.09 | 0.68 | 0.09 | 4063 | 4702402 | <i>Aeromonas salmonicida</i> subsp. <i>salmonicida</i> A449                    |
| CP001629 | 41.35 | 50 | 8.93 | 39 | 6.2 | 44 | 9.45 | -537.6 | 332.1 | -422.6 | 274.2 | -578.6 | 197.9 | -483.3 | 291.9 | 0.7  | 0.09 | 0.6  | 0.13 | 0.71 | 0.1  | 0.7  | 0.09 | 3404 | 3942657 | <i>Desulfotomobacterium baculatum</i> DSM 4028                                 |
| CP000478 | 40.05 | 48 | 8    | 39 | 3.9 | 42 | 8.31 | -548.4 | 320.6 | -454   | 273.4 | -585.5 | 171.5 | -523.1 | 279.6 | 0.73 | 0.06 | 0.65 | 0.12 | 0.74 | 0.07 | 0.73 | 0.06 | 4057 | 4990251 | <i>Syntrophobacter fumaroxidans</i> MPOB                                       |
| CP000394 | 40.93 | 46 | 8.19 | 39 | 4.7 | 42 | 8.11 | -547   | 344.5 | -492.4 | 288   | -596.7 | 225.2 | -533.3 | 296.3 | 0.69 | 0.06 | 0.64 | 0.12 | 0.7  | 0.06 | 0.7  | 0.06 | 2398 | 2708355 | <i>Granulibacter thebesiensis</i> CGDNIH1                                      |
| AL450380 | 42.20 | 43 | 7.28 | 40 | 3.3 | 42 | 7.28 | -564.2 | 372.7 | -558   | 330.4 | -665.6 | 245.7 | -555.7 | 329.3 | 0.7  | 0.04 | 0.67 | 0.09 | 0.7  | 0.04 | 0.7  | 0.04 | 1601 | 3268203 | <i>Mycobacterium leprae</i> TN                                                 |
| FM211192 | 42.20 | 43 | 7.29 | 40 | 3.3 | 42 | 7.29 | -564.2 | 373.5 | -556.9 | 330.5 | -665.7 | 245.7 | -556   | 329.3 | 0.7  | 0.04 | 0.67 | 0.09 | 0.7  | 0.04 | 0.7  | 0.04 | 1600 | 3268071 | <i>Mycobacterium leprae</i> Br4923                                             |
| CP000089 | 40.75 | 46 | 7.67 | 40 | 4.5 | 44 | 7.94 | -563.2 | 368.4 | -464.4 | 305.8 | -609.5 | 231.7 | -513.1 | 316.3 | 0.67 | 0.09 | 0.61 | 0.13 | 0.68 | 0.1  | 0.67 | 0.09 | 4166 | 4501104 | <i>Dechloromonas aromatica</i> RCB                                             |
| CP001132 | 41.15 | 46 | 8.54 | 40 | 5.3 | 42 | 8.54 | -541.2 | 336.4 | -462.7 | 288.2 | -585.7 | 209.9 | -501.5 | 294.4 | 0.71 | 0.07 | 0.67 | 0.12 | 0.72 | 0.07 | 0.72 | 0.07 | 2795 | 2885038 | <i>Acidithiobacillus ferrooxidans</i> ATCC 53993                               |
| CP000240 | 41.55 | 46 | 7.11 | 40 | 4   | 42 | 7.18 | -554.9 | 348.4 | -464.6 | 299.2 | -602.5 | 213.8 | -547.8 | 322   | 0.68 | 0.06 | 0.62 | 0.11 | 0.69 | 0.06 | 0.68 | 0.06 | 2726 | 3046682 | <i>Synechococcus</i> sp. JA-2-3B'a(2-13)                                       |
| CP000362 | 41.03 | 48 | 7.42 | 40 | 3.3 | 42 | 7.58 | -547.6 | 324.4 | -460.6 | 281.2 | -593.2 | 195.1 | -529.9 | 293.5 | 0.73 | 0.05 | 0.67 | 0.12 | 0.74 | 0.05 | 0.73 | 0.05 | 3803 | 4133097 | <i>Roseobacter denitrificans</i> OCh 114                                       |
| AE016853 | 41.60 | 48 | 7.29 | 40 | 4.2 | 44 | 7.39 | -550.6 | 345   | -447.7 | 276   | -600.6 | 206.8 | -510   | 290.6 | 0.68 | 0.08 | 0.6  | 0.12 | 0.69 | 0.08 | 0.68 | 0.08 | 5367 | 6397126 | <i>Pseudomonas syringae</i> pv. <i>tomato</i> str. DC3000                      |
| CP001219 | 41.23 | 46 | 8.66 | 40 | 5.4 | 44 | 8.63 | -545.7 | 335.5 | -471   | 294.4 | -586.9 | 210.6 | -503.8 | 292.2 | 0.71 | 0.07 | 0.67 | 0.12 | 0.72 | 0.07 | 0.71 | 0.07 | 3001 | 2982397 | <i>Acidithiobacillus ferrooxidans</i> ATCC 23270                               |
| CP001600 | 42.56 | 50 | 9.6  | 40 | 6.9 | 44 | 10.3 | -525   | 367   | -425.9 | 306.2 | -576.5 | 261.5 | -523.6 | 348.2 | 0.69 | 0.09 | 0.59 | 0.13 | 0.7  | 0.09 | 0.69 | 0.09 | 3461 | 3812315 | <i>Edwardsiella ictaluri</i> 93-146                                            |
| AP006725 | 42.32 | 50 | 8.84 | 40 | 6   | 47 | 9.49 | -533.2 | 351.8 | -407.1 | 243.7 | -585.5 | 215.4 | -501.5 | 294.2 | 0.7  | 0.09 | 0.56 | 0.14 | 0.72 | 0.09 | 0.71 | 0.09 | 4848 | 5248520 | <i>Klebsiella pneumoniae</i> NTUH-K2044                                        |
| CP000058 | 41.98 | 48 | 7.1  | 41 | 3.8 | 44 | 7.19 | -545.2 | 332.6 | -449.3 | 270.2 | -588.7 | 196.5 | -511.4 | 285.3 | 0.68 | 0.07 | 0.61 | 0.12 | 0.69 | 0.07 | 0.68 | 0.07 | 4066 | 5928787 | <i>Pseudomonas syringae</i> pv. <i>phaseolicola</i> 1448A                      |
| CP001358 | 41.93 | 50 | 8.82 | 41 | 4.9 | 44 | 9.13 | -550.1 | 340   | -451.5 | 282.2 | -591.1 | 203   | -500.3 | 300.7 | 0.67 | 0.06 | 0.63 | 0.11 | 0.67 | 0.07 | 0.67 | 0.06 | 2334 | 2873437 | <i>Desulfovibrio desulfuricans</i> subsp. <i>desulfuricans</i> str. ATCC 27774 |
| CP000360 | 41.62 | 48 | 7.1  | 41 | 2.8 | 44 | 7.18 | -506.6 | 320.1 | -438.1 | 263.3 | -543.4 | 201.1 | -470.9 | 281.5 | 0.71 | 0.06 | 0.63 | 0.12 | 0.72 | 0.06 | 0.71 | 0.06 | 4774 | 5650368 | <i>Candidatus Koribacter versatilis</i> Ellin345                               |
| CP000964 | 42.71 | 50 | 8.64 | 41 | 6.1 | 47 | 9.52 | -523.8 | 351.3 | -412.3 | 249.9 | -570.5 | 226.8 | -490.3 | 294.1 | 0.71 | 0.09 | 0.58 | 0.13 | 0.72 | 0.09 | 0.71 | 0.09 | 5199 | 5641239 | <i>Klebsiella pneumoniae</i> 342                                               |
| CP001734 | 42.46 | 48 | 8.47 | 41 | 5.3 | 44 | 8.96 | -536.3 | 323.9 | -430.8 | 272.8 | -571.9 | 188.2 | -503.9 | 291.6 | 0.73 | 0.07 | 0.67 | 0.12 | 0.73 | 0.07 | 0.73 | 0.07 | 2444 | 2864304 | <i>Desulfohalobium retbaense</i> DSM 5692                                      |
| CP001016 | 42.94 | 46 | 7.76 | 41 | 4.3 | 44 | 8.28 | -511.7 | 294.3 | -438.2 | 249.6 | -555.9 | 171.3 | -496.7 | 263.6 | 0.72 | 0.06 | 0.68 | 0.11 | 0.73 | 0.07 | 0.72 | 0.06 | 3558 | 4170153 | <i>Beijerinckia indica</i> subsp. <i>indica</i> ATCC 9039                      |
| CP000930 | 43.02 | 48 | 8.36 | 41 | 6   | 47 | 8.98 | -503.1 | 330   | -423.8 | 272.4 | -549.4 | 206.2 | -453.1 | 266.6 | 0.72 | 0.06 | 0.68 | 0.11 | 0.73 | 0.08 | 0.72 | 0.08 | 2784 | 3075407 | <i>Heliobacterium modesticaldum</i> Ice1                                       |
| CP000096 | 42.67 | 50 | 7.47 | 41 | 4   | 47 | 8.22 | -480.6 | 315.2 | -387.5 | 283.2 | -525.7 | 197.5 | -437.9 | 302.5 | 0.72 | 0.07 | 0.65 | 0.12 | 0.73 | 0.07 | 0.72 | 0.07 | 2082 | 2364842 | <i>Pelodictyon luteolum</i> DSM 273                                            |
| CP001706 | 41.58 | 43 | 6.95 | 41 | 3.4 | 42 | 6.53 | -562.5 | 432.9 | -507.1 | 418.3 | -601.1 | 310.6 | -551.8 | 415.4 | 0.76 | 0.05 | 0.75 | 0.09 | 0.77 | 0.05 | 0.77 | 0.05 | 2481 | 2749646 | <i>Jonesia denitrificans</i> DSM 20603                                         |
| CP001226 | 41.61 | 43 | 8.41 | 41 | 3.1 | 44 | 8.05 | -903.4 | 544.6 | -1036  | 555.1 | -1019  | 377.6 | -1008  | 519.2 | 0.67 | 0.03 | 0.66 | 0.1  | 0.67 | 0.04 | 0.67 | 0.04 | 162  | 143795  | <i>Candidatus Hodgkinia cicadicola</i> Dsem                                    |
| CP000859 | 43.83 | 52 | 8.79 | 41 | 6.1 | 47 | 9.51 | -532.7 | 329.2 | -414.7 | 258.2 | -589.9 | 186.7 | -453.6 | 267.2 | 0.69 | 0.08 | 0.6  | 0.13 | 0.7  | 0.09 | 0.7  | 0.09 | 3260 | 3944167 | <i>Desulfococcus oleovorans</i> Hxd3                                           |
| CP000112 | 42.16 | 48 | 8.71 | 41 | 5   | 44 | 9.16 | -548.6 | 362.2 | -465.8 | 322.5 | -576.5 | 241.6 | -525.2 | 340.3 | 0.69 | 0.07 | 0.65 | 0.12 | 0.7  | 0.07 | 0.69 | 0.07 | 3510 | 3730232 | <i>Desulfovibrio desulfuricans</i> subsp. <i>desulfuricans</i> str. G20        |
| CP000783 | 43.23 | 50 | 8.79 | 41 | 6.1 | 47 | 9.41 | -519.1 | 343   | -423.1 | 253.6 | -560   | 211.7 | -499.7 | 293.8 | 0.69 | 0.09 | 0.58 | 0.13 | 0.7  | 0.09 | 0.7  | 0.09 | 4143 | 4368373 | <i>Cronobacter sakazakii</i> ATCC BAA-894                                      |
| CP001620 | 42.54 | 46 | 7.14 | 42 | 3.7 | 44 | 7.23 | -521.1 | 348.4 | -463.4 | 314.7 | -552.3 | 219.9 | -492.7 | 311.7 | 0.66 | 0.05 | 0.71 | 0.09 | 0.77 | 0.05 | 0.76 | 0.05 | 1993 | 2446804 | <i>Corynebacterium kroppenstedtii</i> DSM 44385                                |
| CP000514 | 42.73 | 48 | 7.1  | 42 | 3.7 | 44 | 7.4  | -492.4 | 314.9 | -402.2 | 285.5 | -528   | 192.9 | -471.2 | 286.7 | 0.7  | 0.07 | 0.63 | 0.12 | 0.7  | 0.07 | 0.7  | 0.07 | 3853 | 4326849 | <i>Marinobacter aquaeolei</i> VT8                                              |
| AE006470 | 43.47 | 50 | 8.08 | 42 | 5.6 | 49 | 8.61 | -488.8 | 323.3 | -396.7 | 262.8 | -526.3 | 203.8 | -441.4 | 285.7 | 0.71 | 0.09 | 0.61 | 0.12 | 0.72 | 0.09 | 0.71 | 0.09 | 2051 | 2154946 | <i>Chlorobium tepidum</i> TLS                                                  |
| CP001099 | 44.20 | 52 | 7.68 | 42 | 5.7 | 49 | 8.38 | -494.3 | 323.6 | -388.4 | 266.1 | -529   | 203.6 | -428.5 | 269.8 | 0.72 | 0.09 | 0.63 | 0.12 | 0.73 | 0.09 | 0.72 | 0.09 | 2037 | 2289249 | <i>Chlorobaculum parvum</i> NCIB 8327                                          |
| CP000232 | 44.21 | 50 | 9.31 | 42 | 6.5 | 49 | 9.82 | -514.1 | 329.8 | -412.2 | 274.3 | -574.1 | 198.8 | -466.9 | 272.8 | 0.71 | 0.07 | 0.66 | 0.12 | 0.71 | 0.07 | 0.71 | 0.07 | 2459 | 2628784 | <i>Moorella thermoacetica</i> ATCC 39073                                       |
| CP001074 | 44.24 | 50 | 8.54 | 42 | 4.8 | 47 | 9.22 | -503.2 | 333.6 | -411.1 | 282.4 | -535.5 | 214.4 | -497.4 | 329.2 | 0.7  | 0.07 | 0.62 | 0.12 | 0.71 | 0.07 | 0.7  | 0.07 | 2115 | 2664102 | <i>Akkermansia muciniphila</i> ATCC BAA-835                                    |
| CP001364 | 43.32 | 48 | 7.35 | 42 | 4.3 | 44 | 7.54 | -528.9 | 362   | -444.3 | 284.3 | -573.7 | 233.5 | -481.6 | 310   | 0.74 | 0.05 | 0.7  | 0.1  | 0.74 | 0.05 | 0.74 | 0.05 | 4099 | 5268950 | <i>Chloroflexus</i> sp. Y-400-II                                               |
| CP000909 | 43.30 | 50 | 7.02 | 43 | 3.8 | 44 | 7.36 | -529.4 | 363.9 | -433.7 | 264.9 | -567.9 | 207.1 | -476.9 | 303.9 | 0.74 | 0.04 | 0.7  | 0.1  | 0.74 | 0.04 | 0.74 | 0.04 | 3849 | 5258541 | <i>Chloroflexus aurantiacus</i> J-10-II                                        |
| AP008231 | 44.52 | 46 | 6.98 | 43 | 4.2 | 44 | 7.42 | -508.1 | 293.8 | -433.6 | 254   | -556.3 | 169.6 | -498.9 | 268   | 0.77 | 0.04 | 0.74 | 0.1  | 0.77 | 0.05 | 0.77 | 0.04 | 2502 | 2696255 | <i>Synechococcus elongatus</i> PCC 6301                                        |
| CP000100 | 44.53 | 46 | 7.04 | 43 | 4.3 | 44 | 7.5  | -507.8 | 288.3 | -442.1 | 251.7 | -555.2 | 164.9 | -488.8 | 268.9 | 0.77 | 0.05 | 0.74 | 0.1  | 0.77 | 0.05 | 0.77 | 0.05 | 2581 | 2695903 | <i>Synechococcus elongatus</i> PCC 7942                                        |
| CP000826 | 44.93 | 52 | 8.15 | 43 | 4.8 | 47 | 8.45 | -500.6 | 324.7 | -398.8 | 245.1 | -548.6 | 207.8 | -472.9 | 270.7 | 0.69 | 0.07 | 0.6  | 0.12 | 0.7  | 0.07 | 0.69 | 0.07 | 4869 | 5448853 | <i>Serratia proteamaculans</i> 568                                             |
| CP000284 | 44.28 | 50 | 7.92 | 43 | 4.5 | 47 | 8.26 | -491.6 | 303.9 | -412.8 | 253.4 | -529.1 | 186.4 | -462.2 | 266.3 | 0.7  | 0.06 | 0.63 | 0.11 | 0.71 | 0.07 | 0.7  | 0.06 | 2745 | 2971517 | <i>Methylobacillus flagellatus</i> KT                                          |
| CP001337 | 43.57 | 48 | 7.16 | 43 | 4.1 | 47 | 7.43 | -519.6 | 393.4 | -446.4 | 287.9 | -560.7 | 238.5 | -484   | 316.3 | 0.77 | 0.04 | 0.75 | 0.1  | 0.77 | 0.04 | 0.77 | 0.04 | 3703 | 4684931 | <i>Chloroflexus aggregans</i> DSM 9485                                         |
| CP000910 | 43.73 | 46 | 7.3  | 43 | 2.9 | 44 | 7.02 | -497.5 | 301.8 | -456.9 | 270.2 | -535.9 | 187.1 | -486.4 | 273.3 | 0.77 | 0.03 | 0.76 | 0.08 | 0.77 | 0.04 | 0.77 | 0.03 | 3393 | 3155250 | <i>Renibacterium salmoninarum</i> ATCC 33209                                   |
| AP008232 | 45.30 | 52 | 8.84 | 43 | 5.5 | 47 | 9.65 | -488   | 317.6 | -407.9 | 244.3 | -539.7 | 187.9 | -484.6 | 294.5 | 0.7  | 0.06 | 0.63 | 0.11 | 0.71 | 0.07 | 0.7  | 0.06 | 2428 | 4171146 | <i>Sodalis glossinidius</i> str. 'morsitans'                                   |
| CP001654 | 44.98 | 52 | 8.63 | 43 | 6   | 47 | 9.25 | -501.3 | 361.2 | -401.7 | 278   | -543.6 | 252.4 | -490.5 | 318.5 | 0.7  | 0.07 | 0.63 | 0.11 | 0.71 | 0.08 | 0.71 | 0.07 | 3922 | 4679450 | <i>Dickeya dadantii</i> Ech703                                                 |
| CP001674 | 45.14 | 52 | 8.57 | 43 | 6.3 | 49 | 9.3  | -494.4 | 310.9 | -395   | 244   | -533.2 | 191.7 | -460.9 | 273.7 | 0.69 | 0.07 | 0.62 | 0.12 | 0.7  | 0.07 | 0.7  | 0.07 | 2781 | 2995511 | <i>Methylovorus</i> sp. SIP3-4                                                 |
|          |       |    |      |    |     |    |      |        |       |        |       |        |       |        |       |      |      |      |      |      |      |      |      |      |         |                                                                                |

|          |       |    |      |    |     |    |      |        |       |        |       |        |       |        |       |      |      |      |      |      |      |      |      |      |         |                                                                           |
|----------|-------|----|------|----|-----|----|------|--------|-------|--------|-------|--------|-------|--------|-------|------|------|------|------|------|------|------|------|------|---------|---------------------------------------------------------------------------|
| CP000435 | 47.55 | 48 | 8.2  | 46 | 5.6 | 49 | 8.4  | -477.8 | 299.7 | -457.2 | 278.2 | -505.9 | 210.8 | -457.7 | 276.6 | 0.81 | 0.03 | 0.8  | 0.07 | 0.81 | 0.04 | 0.81 | 0.03 | 2686 | 2606748 | Synechococcus sp. CC9311                                                  |
| AM889136 | 48.05 | 52 | 9.39 | 45 | 6.5 | 51 | 9.48 | -485.7 | 344.6 | -429.3 | 301.3 | -520.3 | 247.7 | -465.2 | 289.3 | 0.72 | 0.08 | 0.68 | 0.12 | 0.72 | 0.08 | 0.72 | 0.08 | 1841 | 2145295 | Neisseria meningitidis alpha14                                            |
| AL157959 | 48.19 | 52 | 9.54 | 45 | 7.1 | 51 | 9.78 | -481.6 | 350.9 | -411.5 | 298.1 | -507.3 | 252.3 | -459   | 287.4 | 0.72 | 0.08 | 0.69 | 0.12 | 0.72 | 0.09 | 0.72 | 0.08 | 1894 | 2184406 | Neisseria meningitidis ZF491                                              |
| AP008937 | 48.53 | 55 | 8.27 | 45 | 5.7 | 53 | 8.37 | -469   | 302.1 | -377   | 229   | -519   | 193.2 | -411.6 | 244.6 | 0.76 | 0.08 | 0.69 | 0.11 | 0.77 | 0.08 | 0.76 | 0.08 | 1828 | 2098685 | Lactobacillus fermentum IFO 3956                                          |
| AM421808 | 48.38 | 55 | 9.53 | 46 | 7.1 | 51 | 9.89 | -482.1 | 347   | -420.6 | 294.9 | -515.3 | 248.8 | -473.4 | 288.1 | 0.72 | 0.08 | 0.69 | 0.12 | 0.73 | 0.08 | 0.72 | 0.08 | 1900 | 2194961 | Neisseria meningitidis FAM18                                              |
| AM933173 | 47.80 | 55 | 8.37 | 46 | 5.4 | 51 | 8.89 | -439.2 | 285.2 | -375.3 | 215.9 | -470.9 | 184.4 | -430.6 | 238.8 | 0.69 | 0.06 | 0.64 | 0.11 | 0.7  | 0.06 | 0.69 | 0.06 | 3937 | 4658697 | Salmonella enterica subsp. enterica serovar Gallinarum str. 287/91        |
| AE006468 | 47.78 | 55 | 8.3  | 46 | 5.5 | 51 | 9.01 | -438.3 | 278.4 | -373.9 | 213.2 | -469.3 | 172.9 | -418.5 | 233   | 0.69 | 0.06 | 0.64 | 0.11 | 0.7  | 0.06 | 0.7  | 0.06 | 4401 | 4857432 | Salmonella enterica subsp. enterica serovar Typhimurium str. LT2          |
| CP001113 | 47.78 | 55 | 8.54 | 46 | 5.7 | 51 | 9.06 | -438   | 276.8 | -372.1 | 212.5 | -464.9 | 173.7 | -417.9 | 231.2 | 0.69 | 0.06 | 0.64 | 0.11 | 0.7  | 0.06 | 0.7  | 0.06 | 4342 | 4827641 | Salmonella enterica subsp. enterica serovar Newport str. SL254            |
| AM933172 | 47.83 | 55 | 8.37 | 46 | 5.5 | 51 | 8.96 | -435.5 | 276.8 | -371.5 | 211.3 | -463.7 | 172.4 | -419.8 | 232.8 | 0.69 | 0.06 | 0.64 | 0.11 | 0.7  | 0.06 | 0.69 | 0.06 | 4175 | 4685848 | Salmonella enterica subsp. enterica serovar Enteritidis str.              |
| CP000026 | 47.84 | 55 | 8.5  | 46 | 5.6 | 51 | 9    | -434.1 | 282.4 | -368.3 | 216.8 | -467.8 | 184.2 | -413.2 | 230.2 | 0.69 | 0.06 | 0.64 | 0.11 | 0.7  | 0.06 | 0.7  | 0.06 | 4029 | 4585229 | Salmonella enterica subsp. enterica serovar Paratyphi A str. ATCC 4585229 |
| FM200053 | 47.82 | 55 | 8.55 | 46 | 5.6 | 51 | 8.95 | -434.1 | 282.2 | -371.4 | 215.7 | -466.6 | 181.9 | -412.9 | 228.8 | 0.69 | 0.06 | 0.64 | 0.11 | 0.7  | 0.06 | 0.7  | 0.06 | 4022 | 0       | Salmonella enterica subsp. enterica serovar Paratyphi A str.              |
| AE002098 | 48.47 | 55 | 9.73 | 46 | 7.6 | 51 | 10.4 | -485.9 | 350.4 | -415.1 | 292.3 | -511.4 | 254.5 | -462.2 | 301.9 | 0.72 | 0.09 | 0.7  | 0.12 | 0.72 | 0.09 | 0.72 | 0.09 | 2010 | 2272360 | Neisseria meningitidis MC58                                               |
| CP001138 | 47.92 | 55 | 8.7  | 46 | 6   | 51 | 9.16 | -433.8 | 280.1 | -371.4 | 211.3 | -464.1 | 174.2 | -420.5 | 231.4 | 0.69 | 0.06 | 0.64 | 0.11 | 0.7  | 0.06 | 0.7  | 0.06 | 4292 | 4798660 | Salmonella enterica subsp. enterica serovar Agona str. SL483              |
| BA000043 | 47.91 | 52 | 8.83 | 46 | 6.2 | 51 | 9.66 | -449.1 | 299.4 | -365   | 250   | -481.8 | 194.5 | -431.1 | 271.8 | 0.74 | 0.07 | 0.71 | 0.12 | 0.75 | 0.08 | 0.74 | 0.07 | 3437 | 3544776 | Geobacillus kaustophilus HTA426                                           |
| CP000381 | 48.30 | 52 | 9.84 | 46 | 7.1 | 51 | 9.87 | -480.4 | 347.2 | -419.3 | 299.9 | -508.2 | 250.9 | -461.1 | 292.7 | 0.72 | 0.08 | 0.68 | 0.12 | 0.72 | 0.09 | 0.72 | 0.08 | 1966 | 2153416 | Neisseria meningitidis 053442                                             |
| CP001127 | 47.83 | 55 | 8.37 | 46 | 5.7 | 51 | 9.01 | -435.5 | 276.7 | -371.5 | 211.1 | -466.5 | 174.5 | -417.7 | 232.5 | 0.69 | 0.06 | 0.65 | 0.11 | 0.7  | 0.06 | 0.7  | 0.06 | 4223 | 4709075 | Salmonella enterica subsp. enterica serovar Schwarzengrund str.           |
| AL513382 | 47.91 | 55 | 8.46 | 46 | 5.7 | 51 | 8.97 | -438.6 | 284.5 | -374.5 | 220.6 | -467.5 | 184.1 | -422.7 | 240.9 | 0.69 | 0.06 | 0.64 | 0.11 | 0.7  | 0.06 | 0.7  | 0.06 | 4324 | 4809037 | Salmonella enterica subsp. enterica serovar Typhi str. CT18               |
| CP001120 | 47.91 | 55 | 8.47 | 46 | 5.7 | 51 | 9.1  | -436.6 | 276.2 | -371   | 214.4 | -465.1 | 173   | -421.4 | 230.4 | 0.69 | 0.06 | 0.65 | 0.11 | 0.7  | 0.06 | 0.7  | 0.06 | 4380 | 4888768 | Salmonella enterica subsp. enterica serovar Heidelberg str. SL476         |
| AE014613 | 47.95 | 55 | 8.45 | 46 | 5.6 | 51 | 8.96 | -440.1 | 291.7 | -374.3 | 222.2 | -471.9 | 192.7 | -427.1 | 237.6 | 0.69 | 0.06 | 0.64 | 0.11 | 0.7  | 0.06 | 0.7  | 0.06 | 4251 | 4791961 | Salmonella enterica subsp. enterica serovar Typhi str. Ty2                |
| CP001144 | 47.82 | 55 | 8.47 | 46 | 5.7 | 51 | 9.02 | -435   | 276.6 | -373.5 | 214.9 | -463.4 | 173.2 | -419.1 | 231.6 | 0.69 | 0.06 | 0.64 | 0.11 | 0.7  | 0.06 | 0.7  | 0.06 | 4251 | 4842908 | Salmonella enterica subsp. enterica serovar Dublin str. CT_02021853       |
| CP000607 | 47.01 | 52 | 7.28 | 46 | 3.5 | 49 | 7.79 | -428.2 | 301.9 | -360.6 | 267.8 | -453.2 | 206.4 | -392.2 | 288   | 0.8  | 0.04 | 0.78 | 0.1  | 0.81 | 0.04 | 0.81 | 0.04 | 1750 | 1966858 | Chlorobium phaeovibrioides DSM 265                                        |
| CP001657 | 48.07 | 55 | 8.13 | 46 | 5.2 | 51 | 8.46 | -435.7 | 282.8 | -366.8 | 226.1 | -466.1 | 176   | -415.3 | 237.6 | 0.71 | 0.06 | 0.66 | 0.11 | 0.72 | 0.06 | 0.72 | 0.06 | 4195 | 4862913 | Pectobacterium carotovorum subsp. carotovorum PC1                         |
| AE017220 | 47.84 | 55 | 8.55 | 46 | 5.8 | 51 | 9.03 | -436.9 | 276.3 | -378.2 | 215.2 | -461.2 | 173.8 | -419.1 | 231.5 | 0.69 | 0.06 | 0.64 | 0.11 | 0.7  | 0.06 | 0.69 | 0.06 | 4351 | 4755700 | Salmonella enterica subsp. enterica serovar Choleraesuis str.             |
| CP000857 | 47.84 | 55 | 8.75 | 46 | 5.8 | 51 | 9.05 | -450.3 | 283.2 | -389   | 222.6 | -476.3 | 185.9 | -424.5 | 235.2 | 0.69 | 0.06 | 0.65 | 0.11 | 0.7  | 0.06 | 0.7  | 0.06 | 4395 | 4833080 | Salmonella enterica subsp. enterica serovar Paratyphi C strain            |
| CP000886 | 47.89 | 55 | 8.81 | 46 | 6.1 | 51 | 9.22 | -435   | 280.3 | -379.9 | 219.9 | -463.1 | 184.8 | -412.4 | 230.5 | 0.69 | 0.06 | 0.65 | 0.11 | 0.7  | 0.07 | 0.7  | 0.06 | 4792 | 4858887 | Salmonella enterica subsp. enterica serovar Paratyphi B str. SPB7         |
| AE000520 | 47.22 | 50 | 8.35 | 47 | 4.6 | 49 | 8.39 | -468   | 371.2 | -446.9 | 404.3 | -517.7 | 276.6 | -470.1 | 343   | 0.79 | 0.03 | 0.79 | 0.08 | 0.79 | 0.03 | 0.79 | 0.03 | 1000 | 1138011 | Treponema pallidum subsp. pallidum str. Nichols                           |
| CP000805 | 47.22 | 50 | 8.36 | 47 | 4.6 | 49 | 8.42 | -468.2 | 371.4 | -445.2 | 405.5 | -520   | 276.9 | -470.5 | 345   | 0.79 | 0.03 | 0.78 | 0.08 | 0.79 | 0.03 | 0.79 | 0.03 | 996  | 1139457 | Treponema pallidum subsp. pallidum SS14                                   |
| CP000941 | 48.08 | 50 | 8.41 | 47 | 5.1 | 49 | 8.23 | -459.9 | 411.8 | -386.9 | 325.9 | -492.5 | 302.8 | -433.7 | 371.1 | 0.8  | 0.04 | 0.78 | 0.08 | 0.8  | 0.04 | 0.8  | 0.04 | 2042 | 2475130 | Xylella fastidiosa M12                                                    |
| AE003849 | 47.33 | 50 | 9.02 | 47 | 6.2 | 49 | 9.09 | -560.5 | 408.7 | -491.9 | 349.4 | -604   | 324.6 | -537.1 | 381.6 | 0.78 | 0.04 | 0.77 | 0.09 | 0.79 | 0.05 | 0.79 | 0.04 | 2645 | 2679306 | Xylella fastidiosa 9a5c                                                   |
| CP000880 | 48.62 | 55 | 8.96 | 47 | 6.2 | 51 | 9.26 | -428.2 | 277.4 | -379.8 | 217.7 | -456   | 174.6 | -411.4 | 230.8 | 0.7  | 0.06 | 0.66 | 0.11 | 0.7  | 0.06 | 0.7  | 0.06 | 4358 | 4600800 | Salmonella enterica subsp. arizonae serovar 62:z4,z23:--                  |
| CP000934 | 48.01 | 52 | 8.56 | 47 | 5.2 | 51 | 8.8  | -459.4 | 295.7 | -401.9 | 248.8 | -502.4 | 183   | -449.5 | 261.5 | 0.72 | 0.05 | 0.68 | 0.1  | 0.72 | 0.05 | 0.72 | 0.05 | 3587 | 4576573 | Cellvibrio japonicus Ueda107                                              |
| CP001011 | 48.24 | 52 | 8.79 | 47 | 5.5 | 49 | 8.51 | -455.3 | 421.4 | -375.6 | 362.5 | -485.3 | 304.1 | -415.7 | 357.8 | 0.79 | 0.04 | 0.78 | 0.09 | 0.79 | 0.04 | 0.79 | 0.04 | 2136 | 2535690 | Xylella fastidiosa M23                                                    |
| AE009442 | 48.22 | 52 | 8.85 | 47 | 5.2 | 49 | 8.47 | -456.8 | 417.7 | -381.2 | 362   | -485.9 | 297.8 | -419.3 | 353.9 | 0.79 | 0.04 | 0.78 | 0.09 | 0.8  | 0.04 | 0.8  | 0.04 | 2030 | 2519802 | Xylella fastidiosa Tecumela1                                              |
| CP001619 | 48.46 | 57 | 8.13 | 47 | 4.3 | 53 | 8.93 | -419.4 | 261.4 | -359.9 | 212.8 | -447.6 | 141.9 | -383.6 | 223.9 | 0.72 | 0.05 | 0.65 | 0.1  | 0.73 | 0.06 | 0.73 | 0.06 | 5665 | 6967790 | Dyadobacter fermentans DSM 18053                                          |
| CR954253 | 50.28 | 59 | 8.4  | 47 | 5.4 | 56 | 8.52 | -445.5 | 275.1 | -340.3 | 214   | -490.6 | 177.1 | -406.3 | 222.3 | 0.71 | 0.08 | 0.63 | 0.11 | 0.72 | 0.08 | 0.71 | 0.08 | 1507 | 1864998 | Lactobacillus delbrueckii subsp. bulgaricus ATCC 11842                    |
| CP000412 | 50.31 | 57 | 8.61 | 47 | 5.7 | 56 | 8.73 | -444.2 | 274.3 | -348.1 | 212.9 | -486   | 171.7 | -409.2 | 220   | 0.71 | 0.08 | 0.64 | 0.11 | 0.72 | 0.08 | 0.71 | 0.08 | 1633 | 1856951 | Lactobacillus delbrueckii subsp. bulgaricus ATCC BAA-365                  |
| CP001063 | 48.67 | 52 | 8.16 | 47 | 4.3 | 51 | 8.17 | -435.3 | 270.7 | -385.9 | 218.8 | -455.8 | 167.3 | -418.4 | 217.9 | 0.71 | 0.06 | 0.68 | 0.1  | 0.71 | 0.06 | 0.71 | 0.06 | 4092 | 4615997 | Shigella boydii CDC 3083-94                                               |
| CP000038 | 48.99 | 52 | 8.15 | 47 | 4.3 | 51 | 8.19 | -430.2 | 266.3 | -374.8 | 216.6 | -460   | 157.5 | -420.1 | 221.7 | 0.71 | 0.06 | 0.68 | 0.11 | 0.72 | 0.06 | 0.71 | 0.06 | 4192 | 4825265 | Shigella sonnei Ss046                                                     |
| CP000036 | 48.79 | 52 | 8.3  | 47 | 4.2 | 53 | 8.13 | -432.8 | 272   | -394   | 225.2 | -459.7 | 165.7 | -413.3 | 226.6 | 0.71 | 0.06 | 0.67 | 0.11 | 0.72 | 0.06 | 0.71 | 0.06 | 4109 | 4519823 | Shigella boydii Sb227                                                     |
| AE014073 | 49.09 | 52 | 8.2  | 47 | 4.1 | 51 | 7.88 | -425.8 | 265.2 | -376.3 | 215.8 | -452.7 | 161.4 | -418.4 | 220   | 0.71 | 0.06 | 0.67 | 0.11 | 0.72 | 0.06 | 0.71 | 0.06 | 4030 | 4599354 | Shigella flexneri 2a str. 2457T                                           |
| AE005674 | 49.11 | 55 | 8.04 | 47 | 4.3 | 53 | 8.04 | -424.5 | 264.2 | -368.4 | 214.6 | -448.6 | 158.7 | -414.2 | 218.7 | 0.71 | 0.06 | 0.68 | 0.11 | 0.72 | 0.06 | 0.71 | 0.06 | 4156 | 4607203 | Shigella flexneri 2a str. 301                                             |
| BX548175 | 49.26 | 48 | 8.14 | 47 | 5.3 | 51 | 7.97 | -385.9 | 279   | -380.8 | 254.5 | -407   | 201.8 | -363.3 | 254.9 | 0.81 | 0.03 | 0.81 | 0.07 | 0.81 | 0.03 | 0.81 | 0.03 | 2627 | 2410873 | Prochlorococcus marinus str. MIT 9313                                     |
| CP000034 | 48.75 | 52 | 7.93 | 47 | 4.1 | 53 | 8.66 | -426.3 | 272   | -388.1 | 219.8 | -454   | 176.4 | -403.1 | 213   | 0.7  | 0.06 | 0.68 | 0.1  | 0.71 | 0.06 | 0.7  | 0.06 | 4242 | 4369232 | Shigella dysenteriae Sd197                                                |
| BX950851 | 49.03 | 55 | 8.27 | 47 | 5.5 | 51 | 8.43 | -425   | 269.6 | -361.6 | 218.9 | -452.8 | 169.8 | -404.4 | 228.3 | 0.73 | 0.05 | 0.69 | 0.1  | 0.73 | 0.05 | 0.73 | 0.05 | 4448 | 5064019 | Pectobacterium atropoticum SCRI1043                                       |
| CP000266 | 49.08 | 52 | 8.27 | 47 | 4.2 | 51 | 8.01 | -426.2 | 264.6 | -384.9 | 217.7 | -448.6 | 158.4 | -404.7 | 221.5 | 0.71 | 0.06 | 0.68 | 0.1  | 0.72 | 0.06 | 0.71 | 0.06 | 4093 | 4574284 | Shigella flexneri 5 str. 8401                                             |
| AP009048 | 49.20 | 55 | 7.93 | 47 | 4.9 | 51 | 8.19 | -432.3 | 269.1 | -371.6 | 216.9 | -459.8 | 166.6 | -419   | 225.5 | 0.71 | 0.06 | 0.67 | 0.1  | 0.72 | 0.06 | 0.71 | 0.06 | 4187 | 4646332 | Escherichia coli str. K-12 substr. W3110                                  |
| CP000819 | 49.23 | 55 | 8.01 | 47 | 5   | 51 | 8.33 | -428.2 | 266.9 | -373   | 215.9 | -457.8 | 164.6 | -414.8 | 221.8 | 0.71 | 0.06 | 0.67 | 0.11 | 0.7  |      |      |      |      |         |                                                                           |

|          |       |    |      |    |     |    |      |        |       |        |       |        |       |        |       |      |      |      |      |      |      |      |      |      |         |                                                    |
|----------|-------|----|------|----|-----|----|------|--------|-------|--------|-------|--------|-------|--------|-------|------|------|------|------|------|------|------|------|------|---------|----------------------------------------------------|
| CP000247 | 49.48 | 55 | 8.28 | 48 | 5.4 | 53 | 8.53 | -424.1 | 264.6 | -365.6 | 211.1 | -450.7 | 163.4 | -413.3 | 221.6 | 0.72 | 0.06 | 0.68 | 0.1  | 0.72 | 0.06 | 0.72 | 0.06 | 4594 | 4938920 | Escherichia coli 536                               |
| CP000252 | 48.54 | 57 | 8.61 | 48 | 6.2 | 53 | 9.38 | -431.9 | 264.8 | -357.7 | 228.2 | -460.6 | 163.2 | -390.5 | 232.6 | 0.74 | 0.05 | 0.7  | 0.1  | 0.74 | 0.06 | 0.74 | 0.05 | 3158 | 3179300 | Syntrophus aciditrophicus SB                       |
| AE014075 | 49.52 | 55 | 8.41 | 48 | 5.4 | 53 | 8.59 | -424.1 | 268.1 | -376.2 | 216.7 | -449.7 | 163.7 | -413.2 | 223.4 | 0.72 | 0.05 | 0.67 | 0.1  | 0.72 | 0.06 | 0.72 | 0.06 | 5131 | 5231428 | Escherichia coli CFT073                            |
| CP001614 | 49.11 | 55 | 8.14 | 48 | 4.8 | 51 | 8.52 | -434   | 271.1 | -377.6 | 229.7 | -467   | 161.9 | -418.1 | 236   | 0.74 | 0.04 | 0.72 | 0.08 | 0.74 | 0.04 | 0.74 | 0.04 | 4093 | 5193164 | Teredinibacter turnerae T7901                      |
| CP000243 | 49.40 | 55 | 8.28 | 48 | 5.2 | 53 | 8.51 | -426.7 | 266.5 | -371.1 | 215.8 | -451.1 | 164.6 | -414.6 | 221.4 | 0.72 | 0.06 | 0.67 | 0.11 | 0.72 | 0.06 | 0.72 | 0.06 | 4956 | 5065741 | Escherichia coli UT189                             |
| AL954747 | 49.28 | 55 | 8.33 | 48 | 4.5 | 53 | 8.33 | -396.6 | 262.4 | -350.6 | 216.7 | -427.1 | 149.6 | -372.6 | 215.1 | 0.76 | 0.04 | 0.73 | 0.09 | 0.76 | 0.04 | 0.76 | 0.04 | 2459 | 2812094 | Nitrosomonas europaea ATCC 19718                   |
| CP001682 | 49.09 | 52 | 7.13 | 48 | 3.5 | 51 | 7.17 | -426.3 | 280.9 | -366.5 | 221.6 | -459.4 | 179.8 | -413   | 252   | 0.79 | 0.04 | 0.77 | 0.09 | 0.79 | 0.04 | 0.79 | 0.04 | 1341 | 1617804 | Cryptobacterium curtum DSM 15641                   |
| CP000951 | 50.37 | 55 | 7.94 | 48 | 4.4 | 51 | 7.96 | -431.9 | 274.5 | -382.3 | 240.3 | -466.2 | 157.2 | -418   | 245.9 | 0.74 | 0.04 | 0.72 | 0.09 | 0.74 | 0.04 | 0.74 | 0.04 | 2770 | 3008047 | Synechococcus sp. PCC 7002                         |
| CP001656 | 49.72 | 57 | 7.67 | 48 | 4.7 | 53 | 8.43 | -380.5 | 247.6 | -305.1 | 193   | -401.5 | 139.5 | -356.9 | 209.8 | 0.76 | 0.05 | 0.73 | 0.09 | 0.77 | 0.05 | 0.77 | 0.05 | 6146 | 7184930 | Paenibacillus sp. JDR-2                            |
| CP000875 | 49.28 | 52 | 7.23 | 49 | 4.2 | 51 | 7.83 | -498.6 | 321.6 | -420.3 | 256.9 | -534.8 | 173.7 | -474.3 | 262.2 | 0.69 | 0.04 | 0.65 | 0.1  | 0.69 | 0.04 | 0.69 | 0.04 | 4970 | 6346587 | Herpetosiphon aurantiacus ATCC 23779               |
| BX842601 | 49.35 | 57 | 7.31 | 48 | 3.1 | 53 | 7.87 | -446.3 | 263.5 | -391.2 | 227.6 | -476   | 155.7 | -433.2 | 244.1 | 0.73 | 0.05 | 0.64 | 0.11 | 0.74 | 0.05 | 0.74 | 0.05 | 3516 | 3782950 | Bdellovibrio bacteriovorus HD100                   |
| CP000127 | 49.68 | 55 | 8.68 | 49 | 4.8 | 53 | 8.65 | -409   | 270.3 | -361.2 | 233.6 | -438.1 | 170.3 | -382.6 | 245.1 | 0.77 | 0.03 | 0.76 | 0.07 | 0.77 | 0.03 | 0.77 | 0.03 | 2969 | 3481691 | Nitrosococcus oceanii ATCC 19707                   |
| CJ928158 | 50.06 | 55 | 8.12 | 49 | 5   | 53 | 8.3  | -418.4 | 258.2 | -367.6 | 211.6 | -447.7 | 158.3 | -410   | 217.1 | 0.73 | 0.05 | 0.69 | 0.1  | 0.73 | 0.06 | 0.73 | 0.05 | 4223 | 4588711 | Escherichia fergusonii ATCC 35469                  |
| CP001108 | 49.90 | 57 | 7.01 | 49 | 4.2 | 53 | 8.19 | -397.6 | 272.8 | -345.1 | 240.2 | -420.9 | 183.6 | -381   | 257.1 | 0.81 | 0.04 | 0.78 | 0.09 | 0.81 | 0.04 | 0.81 | 0.04 | 2239 | 2512923 | Prosthecochloris aestuarii DSM 271                 |
| CP000557 | 50.99 | 55 | 8.5  | 49 | 5.8 | 53 | 9.19 | -401.1 | 266.9 | -330.6 | 232.8 | -421.6 | 167.7 | -388.4 | 244.9 | 0.75 | 0.05 | 0.74 | 0.1  | 0.75 | 0.05 | 0.75 | 0.05 | 3389 | 3550319 | Geobacillus thermodinitrificans NG80-2             |
| CP000027 | 51.15 | 57 | 7.85 | 50 | 4.2 | 53 | 8.29 | -431   | 253.3 | -362.6 | 217.3 | -455.1 | 153.2 | -397.9 | 221.5 | 0.73 | 0.05 | 0.72 | 0.09 | 0.74 | 0.05 | 0.73 | 0.05 | 1510 | 1469720 | Dehalococcoides ethenogenes 195                    |
| CP001087 | 51.15 | 59 | 8.41 | 49 | 5.2 | 56 | 8.69 | -443.9 | 264.2 | -363.9 | 228.7 | -471.3 | 153.3 | -405.1 | 239.6 | 0.76 | 0.04 | 0.73 | 0.09 | 0.76 | 0.04 | 0.76 | 0.04 | 4835 | 5589073 | Desulfobacterium autotrophicum HRM2                |
| CP001166 | 50.97 | 57 | 8.02 | 50 | 5.6 | 53 | 8.54 | -416.4 | 261.2 | -363.2 | 207.7 | -445.3 | 172.6 | -404.3 | 216.6 | 0.74 | 0.06 | 0.71 | 0.11 | 0.74 | 0.06 | 0.74 | 0.06 | 3111 | 3471292 | Tolulomas auensis DSM 9187                         |
| CP000030 | 50.24 | 52 | 7.2  | 50 | 3   | 51 | 7.98 | -382.3 | 284.2 | -344   | 309.8 | -394.5 | 184.2 | -393.2 | 294.9 | 0.82 | 0.02 | 0.82 | 0.06 | 0.83 | 0.02 | 0.82 | 0.02 | 947  | 1197687 | Anaplasma marginale str. St. Maries                |
| AE015924 | 51.71 | 57 | 7.62 | 50 | 4.9 | 56 | 8.32 | -396.9 | 250.2 | -365.3 | 221.8 | -421.7 | 137.3 | -374.3 | 226.1 | 0.82 | 0.04 | 0.79 | 0.08 | 0.82 | 0.04 | 0.82 | 0.04 | 1849 | 2343476 | Porphyromonas gingivalis W83                       |
| CP001079 | 50.23 | 52 | 7.28 | 50 | 2.9 | 51 | 7.97 | -383.2 | 285.5 | -333.7 | 314.5 | -394.9 | 182.4 | -393.2 | 299.2 | 0.82 | 0.02 | 0.83 | 0.06 | 0.83 | 0.02 | 0.83 | 0.02 | 941  | 1202435 | Anaplasma marginale str. Florida                   |
| AP009380 | 51.64 | 57 | 7.52 | 50 | 4.8 | 56 | 8.24 | -391.1 | 249.9 | -355.6 | 237.1 | -416.1 | 153.4 | -364.6 | 238.7 | 0.81 | 0.04 | 0.79 | 0.08 | 0.82 | 0.04 | 0.82 | 0.04 | 1972 | 2354886 | Porphyromonas gingivalis ATCC 33277                |
| CP001101 | 51.07 | 57 | 7.04 | 50 | 4.2 | 53 | 7.94 | -399.7 | 259.8 | -341.7 | 217.8 | -426.5 | 158.4 | -360.4 | 231.7 | 0.83 | 0.03 | 0.81 | 0.08 | 0.83 | 0.03 | 0.83 | 0.03 | 2425 | 2736403 | Chlorobium phaeoacetales BS1                       |
| CP001615 | 51.54 | 57 | 7.2  | 50 | 4.3 | 56 | 7.45 | -399.8 | 230.6 | -317.6 | 196.3 | -422.3 | 130.8 | -405.2 | 211   | 0.74 | 0.04 | 0.73 | 0.09 | 0.74 | 0.04 | 0.74 | 0.04 | 2991 | 2999895 | Exiguobacterium sp. AT1b                           |
| CP000469 | 51.95 | 57 | 7.38 | 50 | 4.1 | 56 | 7.77 | -410.5 | 257.4 | -347.3 | 202.8 | -437   | 144.1 | -400.2 | 212.9 | 0.75 | 0.04 | 0.73 | 0.09 | 0.76 | 0.04 | 0.75 | 0.04 | 4099 | 4972204 | Shewanella sp. ANA-3                               |
| BX571656 | 51.54 | 55 | 7.44 | 50 | 3.6 | 56 | 7.53 | -465.5 | 316   | -427.6 | 296.5 | -503.6 | 181.6 | -450.8 | 311.8 | 0.73 | 0.03 | 0.71 | 0.09 | 0.74 | 0.04 | 0.74 | 0.04 | 2038 | 2110355 | Wolinella succinigenes DSM 1740                    |
| CP000446 | 52.11 | 57 | 7.38 | 50 | 3.8 | 56 | 7.61 | -410.5 | 241.8 | -347.5 | 204.4 | -440.2 | 138.9 | -397.5 | 216.3 | 0.75 | 0.03 | 0.72 | 0.09 | 0.75 | 0.04 | 0.75 | 0.03 | 3909 | 4706287 | Shewanella sp. MR-4                                |
| CP000492 | 51.65 | 57 | 7.56 | 50 | 4.6 | 56 | 8.32 | -389.4 | 260.7 | -345.4 | 222.4 | -415.1 | 163.6 | -364.4 | 235.2 | 0.8  | 0.03 | 0.79 | 0.08 | 0.8  | 0.03 | 0.8  | 0.03 | 2643 | 3133902 | Chlorobium phaeoacetales DSM 266                   |
| CP000308 | 52.30 | 57 | 8.36 | 51 | 5   | 53 | 8.41 | -404.4 | 261.2 | -362.4 | 208.4 | -431.1 | 155   | -376.5 | 220.7 | 0.77 | 0.04 | 0.75 | 0.09 | 0.77 | 0.04 | 0.77 | 0.04 | 4112 | 4702289 | Yersinia pestis Antiqua                            |
| CP000668 | 52.36 | 57 | 8.24 | 51 | 4.9 | 53 | 8.41 | -375.8 | 245.4 | -328.2 | 197.7 | -399.3 | 150.9 | -359   | 214.4 | 0.77 | 0.04 | 0.74 | 0.09 | 0.77 | 0.04 | 0.77 | 0.04 | 3809 | 4517345 | Yersinia pestis Pestoides F                        |
| BX936398 | 52.39 | 57 | 8.34 | 51 | 5.1 | 56 | 8.44 | -412   | 270.2 | -367   | 206.9 | -442.8 | 155.6 | -394.5 | 232.2 | 0.77 | 0.04 | 0.75 | 0.09 | 0.77 | 0.04 | 0.77 | 0.04 | 3885 | 4744671 | Yersinia pseudotuberculosis IP 32953               |
| AL590842 | 52.36 | 57 | 8.29 | 51 | 5.1 | 53 | 8.46 | -408.6 | 252.9 | -364.3 | 205.4 | -440   | 154.2 | -388   | 216.2 | 0.77 | 0.04 | 0.75 | 0.09 | 0.77 | 0.04 | 0.77 | 0.04 | 3854 | 4653728 | Yersinia pestis CO92                               |
| AE009952 | 52.36 | 57 | 8.61 | 51 | 5.1 | 53 | 8.47 | -411.6 | 256.6 | -372.3 | 221.6 | -442.2 | 169.2 | -391.9 | 222.1 | 0.77 | 0.04 | 0.74 | 0.09 | 0.77 | 0.04 | 0.77 | 0.04 | 3998 | 4600755 | Yersinia pestis KIM                                |
| CP000720 | 52.46 | 57 | 8.38 | 51 | 5.1 | 56 | 8.47 | -399.6 | 252.3 | -349.7 | 206.6 | -427.8 | 154.9 | -381   | 215.9 | 0.77 | 0.04 | 0.75 | 0.09 | 0.77 | 0.04 | 0.77 | 0.04 | 3911 | 4723306 | Yersinia pseudotuberculosis IP 31758               |
| CP000450 | 51.51 | 57 | 8.83 | 51 | 4.9 | 56 | 8.37 | -403.6 | 248.8 | -355.7 | 233.6 | -438.1 | 159.9 | -375.9 | 224.9 | 0.77 | 0.03 | 0.76 | 0.08 | 0.77 | 0.03 | 0.77 | 0.03 | 2425 | 2661057 | Nitrosomonas eutropha C91                          |
| CP001048 | 52.47 | 57 | 8.57 | 51 | 5.4 | 56 | 8.56 | -411.9 | 268.5 | -364.7 | 208.1 | -441.7 | 159.5 | -392.8 | 232.5 | 0.77 | 0.04 | 0.75 | 0.09 | 0.77 | 0.04 | 0.77 | 0.04 | 4009 | 4695619 | Yersinia pseudotuberculosis PB1/+                  |
| CP000901 | 52.40 | 57 | 8.14 | 51 | 4.9 | 53 | 8.37 | -390.3 | 256.7 | -350.7 | 201.5 | -419.4 | 153.8 | -371.6 | 220.1 | 0.77 | 0.04 | 0.75 | 0.09 | 0.77 | 0.04 | 0.77 | 0.04 | 3599 | 4504254 | Yersinia pestis Angola                             |
| CP000950 | 52.47 | 57 | 8.35 | 51 | 5.2 | 56 | 8.51 | -400.9 | 250.8 | -352.5 | 203.9 | -429.7 | 157   | -382.2 | 212.7 | 0.77 | 0.04 | 0.75 | 0.09 | 0.77 | 0.04 | 0.77 | 0.04 | 4051 | 4689441 | Yersinia pseudotuberculosis YPIII                  |
| CP000305 | 52.42 | 57 | 8.27 | 51 | 5   | 53 | 8.46 | -397.5 | 255.2 | -355.3 | 210.2 | -428.2 | 153   | -380   | 213.7 | 0.77 | 0.04 | 0.74 | 0.09 | 0.77 | 0.04 | 0.77 | 0.04 | 3939 | 4534590 | Yersinia pestis Nepal516                           |
| CP001110 | 51.92 | 57 | 7.34 | 51 | 5   | 56 | 8.18 | -389.5 | 254.1 | -337.2 | 210.2 | -411.7 | 160   | -358   | 234.3 | 0.81 | 0.03 | 0.79 | 0.08 | 0.81 | 0.03 | 0.81 | 0.03 | 2676 | 3018238 | Pelodictyon phaeoacetales BU-1                     |
| AE017042 | 52.35 | 57 | 8.48 | 51 | 5.2 | 53 | 8.45 | -408.8 | 251.2 | -363.5 | 205   | -434.5 | 153.5 | -395.2 | 218.4 | 0.77 | 0.04 | 0.74 | 0.09 | 0.77 | 0.04 | 0.77 | 0.04 | 3884 | 4595065 | Yersinia pestis biovar Microtus str. 91001         |
| AM286415 | 52.73 | 57 | 8.4  | 51 | 4.8 | 56 | 8.26 | -405.6 | 270.1 | -362.9 | 213.2 | -429.4 | 162.2 | -382.3 | 236.5 | 0.76 | 0.04 | 0.74 | 0.09 | 0.77 | 0.04 | 0.77 | 0.04 | 3964 | 4615899 | Yersinia enterocolitica subsp. enterocolitica 8081 |
| CP000828 | 52.75 | 55 | 7.26 | 51 | 4.2 | 56 | 7.29 | -407.2 | 239.8 | -371.7 | 208.2 | -434.4 | 143.6 | -399.3 | 215.5 | 0.8  | 0.03 | 0.79 | 0.07 | 0.8  | 0.03 | 0.8  | 0.03 | 5727 | 6503724 | Acaryochloris marina MBIC11017                     |
| CP001022 | 52.28 | 59 | 7.35 | 51 | 4.4 | 56 | 7.59 | -394.1 | 227.9 | -305.1 | 192   | -416.6 | 126.4 | -382.8 | 204.7 | 0.78 | 0.04 | 0.75 | 0.1  | 0.79 | 0.05 | 0.78 | 0.04 | 2989 | 3034136 | Exiguobacterium sibiricum 255-15                   |
| CP000688 | 52.83 | 59 | 7.43 | 51 | 3.8 | 56 | 7.84 | -398   | 233.9 | -343.2 | 208.7 | -423.2 | 141   | -366.2 | 207.7 | 0.74 | 0.04 | 0.73 | 0.09 | 0.75 | 0.04 | 0.75 | 0.04 | 1358 | 1341892 | Dehalococcoides sp. BAV1                           |
| CP001336 | 52.46 | 59 | 7.53 | 51 | 5   | 56 | 8.4  | -398.1 | 248.4 | -325.1 | 205.8 | -427   | 143.1 | -361   | 217.4 | 0.76 | 0.03 | 0.75 | 0.08 | 0.76 | 0.04 | 0.76 | 0.04 | 4800 | 5279134 | Desulfibacterium hafniense DCB-2                   |
| AP008230 | 52.64 | 59 | 8.17 | 51 | 5.1 | 56 | 8.54 | -367.4 | 239.7 | -302.4 | 209.6 | -395.1 | 138   | -328.3 | 209.6 | 0.76 | 0.04 | 0.75 | 0.08 | 0.77 | 0.04 | 0.77 | 0.04 | 5053 | 5727534 | Desulfibacterium hafniense Y51                     |
| AJ965256 | 52.97 | 59 | 7.5  | 51 | 3.9 | 5  |      |        |       |        |       |        |       |        |       |      |      |      |      |      |      |      |      |      |         |                                                    |

|          |       |    |      |    |     |    |      |        |       |        |       |        |       |        |       |      |      |      |      |      |      |      |      |      |         |                                                               |
|----------|-------|----|------|----|-----|----|------|--------|-------|--------|-------|--------|-------|--------|-------|------|------|------|------|------|------|------|------|------|---------|---------------------------------------------------------------|
| CP000702 | 53.90 | 57 | 6.79 | 53 | 3.4 | 56 | 6.57 | -380   | 243.8 | -347.6 | 250   | -405.9 | 120   | -366.8 | 245.5 | 0.78 | 0.04 | 0.78 | 0.09 | 0.79 | 0.04 | 0.79 | 0.04 | 1779 | 1823511 | Thermotoga petrophila RKU-1                                   |
| CP000282 | 54.17 | 59 | 7.99 | 53 | 3.7 | 58 | 8.08 | -395.6 | 270.2 | -347.4 | 226.5 | -418.2 | 159.5 | -390.8 | 234   | 0.76 | 0.04 | 0.75 | 0.09 | 0.76 | 0.04 | 0.76 | 0.04 | 4005 | 5057531 | Saccharophagus degradans 2-40                                 |
| BX072543 | 53.69 | 55 | 7.69 | 53 | 3.3 | 53 | 7.52 | -395.1 | 273.6 | -382.9 | 264.8 | -414.7 | 170.9 | -371   | 231.9 | 0.76 | 0.02 | 0.75 | 0.07 | 0.76 | 0.03 | 0.76 | 0.03 | 776  | 925938  | Tropheryma whipplei TW08/27                                   |
| CP000969 | 53.82 | 57 | 6.78 | 53 | 3.5 | 56 | 6.64 | -385.3 | 245.8 | -347.1 | 252.9 | -415.2 | 122.8 | -364.7 | 246   | 0.78 | 0.04 | 0.78 | 0.09 | 0.79 | 0.04 | 0.79 | 0.04 | 1816 | 1877693 | Thermotoga sp. RQ2                                            |
| CP000302 | 54.85 | 59 | 7.56 | 53 | 3.9 | 58 | 7.57 | -386.7 | 226.7 | -324.2 | 190.9 | -411.9 | 124.6 | -373.5 | 201.9 | 0.73 | 0.03 | 0.73 | 0.07 | 0.73 | 0.03 | 0.73 | 0.03 | 3746 | 4545906 | Shewanella denitrificans OS217                                |
| CP001699 | 54.77 | 59 | 6.99 | 53 | 3.5 | 60 | 7.58 | -348   | 214.2 | -320.1 | 182.3 | -368   | 119   | -328.9 | 192.4 | 0.74 | 0.04 | 0.71 | 0.09 | 0.75 | 0.04 | 0.74 | 0.04 | 7087 | 9127347 | Chitinophaga pinensis DSM 2588                                |
| CP000140 | 54.94 | 64 | 7.54 | 53 | 5.6 | 62 | 8.71 | -356.9 | 235   | -316.9 | 186   | -381.9 | 147.9 | -331.8 | 197.9 | 0.76 | 0.04 | 0.71 | 0.08 | 0.77 | 0.05 | 0.76 | 0.04 | 3846 | 4811379 | Parabacteroides distasonis ATCC 8503                          |
| CP000746 | 55.08 | 61 | 7.66 | 53 | 4.4 | 60 | 8.4  | -381.9 | 228.3 | -332.7 | 192.6 | -404.5 | 135.5 | -381   | 197.4 | 0.74 | 0.04 | 0.72 | 0.1  | 0.74 | 0.04 | 0.74 | 0.04 | 2072 | 2319663 | Actinobacillus succinogenis 130Z                              |
| CP001721 | 54.31 | 57 | 7.27 | 54 | 4.9 | 56 | 8.06 | -393.1 | 244.6 | -354.2 | 204.5 | -424   | 151.3 | -387.2 | 218.3 | 0.71 | 0.06 | 0.7  | 0.1  | 0.72 | 0.07 | 0.71 | 0.06 | 1344 | 1543805 | Atopobium parvulum DSM 20469                                  |
| CP001617 | 55.34 | 61 | 7.51 | 54 | 4   | 58 | 8.08 | -385.6 | 243.9 | -321.2 | 203   | -414.1 | 158.3 | -354.9 | 211.5 | 0.76 | 0.04 | 0.78 | 0.09 | 0.76 | 0.04 | 0.76 | 0.04 | 2911 | 3197759 | Lactobacillus plantarum JDM1                                  |
| CP001100 | 54.96 | 61 | 7.64 | 53 | 4.9 | 60 | 8.53 | -400.6 | 230.3 | -357.3 | 186.6 | -423.1 | 121.4 | -384.5 | 199.4 | 0.74 | 0.03 | 0.72 | 0.08 | 0.75 | 0.04 | 0.74 | 0.03 | 2701 | 3293456 | Chloroherpeton thalassium ATCC 35110                          |
| CP001010 | 54.44 | 57 | 7.4  | 54 | 3.1 | 56 | 7.4  | -392.6 | 231   | -362.6 | 211.8 | -411.8 | 146.2 | -387.9 | 202.2 | 0.75 | 0.04 | 0.74 | 0.08 | 0.75 | 0.04 | 0.75 | 0.04 | 1453 | 1560469 | Polynucleobacter necessarius subsp. necessarius STIR1         |
| AL935263 | 55.53 | 61 | 7.48 | 54 | 4.2 | 58 | 8.19 | -384.6 | 243.9 | -325   | 197.7 | -413.2 | 155.1 | -355.5 | 212.4 | 0.76 | 0.04 | 0.78 | 0.09 | 0.76 | 0.04 | 0.76 | 0.04 | 2986 | 3308274 | Lactobacillus plantarum WCF51                                 |
| CP001678 | 54.77 | 57 | 7.1  | 54 | 3.2 | 58 | 7.42 | -381.9 | 240.6 | -352.5 | 216.9 | -406.3 | 155.4 | -383.3 | 214.1 | 0.75 | 0.03 | 0.75 | 0.07 | 0.75 | 0.03 | 0.75 | 0.03 | 3085 | 3455622 | Hirschia baltica ATCC 49814                                   |
| CP001103 | 55.12 | 59 | 7.11 | 54 | 3.3 | 58 | 7.11 | -372.3 | 205.9 | -340.5 | 183.7 | -392.1 | 112.3 | -367   | 182.2 | 0.8  | 0.03 | 0.81 | 0.07 | 0.8  | 0.03 | 0.8  | 0.03 | 3853 | 4412282 | Alteromonas macleodii 'Deep ecotype'                          |
| CP000851 | 55.34 | 59 | 6.83 | 54 | 3.4 | 58 | 6.89 | -383.1 | 223.5 | -327.3 | 190.6 | -405.3 | 125.7 | -374.4 | 197.5 | 0.8  | 0.03 | 0.8  | 0.08 | 0.8  | 0.03 | 0.8  | 0.03 | 4221 | 5174581 | Shewanella paaleana ATCC 700345                               |
| CP000931 | 55.41 | 59 | 7.09 | 54 | 3.5 | 58 | 7.08 | -380.6 | 223.2 | -331.2 | 191.5 | -400.2 | 129.7 | -373.1 | 197.7 | 0.8  | 0.03 | 0.8  | 0.08 | 0.8  | 0.03 | 0.8  | 0.03 | 4254 | 5226917 | Shewanella halifaxensis HAW-EB4                               |
| CP000448 | 55.13 | 61 | 8.25 | 54 | 4.8 | 58 | 8.51 | -358.9 | 224   | -301.1 | 207.6 | -381   | 126.1 | -330.3 | 202.5 | 0.76 | 0.03 | 0.76 | 0.07 | 0.76 | 0.03 | 0.76 | 0.03 | 2500 | 2936195 | Syntrophomonas wolfei subsp. wolfei str. Goettingen           |
| CP000767 | 55.46 | 61 | 8.36 | 54 | 5.2 | 60 | 8.88 | -355.6 | 219   | -324.4 | 200.7 | -380.4 | 121.7 | -326.7 | 196.7 | 0.75 | 0.03 | 0.74 | 0.08 | 0.75 | 0.03 | 0.75 | 0.03 | 1830 | 1971264 | Campylobacter curvus 525.92                                   |
| AP006627 | 55.25 | 59 | 7.38 | 54 | 4.2 | 58 | 7.59 | -359.9 | 219.5 | -305.3 | 205.1 | -381.3 | 122.1 | -359   | 206.9 | 0.78 | 0.03 | 0.79 | 0.08 | 0.78 | 0.03 | 0.78 | 0.03 | 4069 | 4303871 | Bacillus clausii KSM-K16                                      |
| CP000388 | 55.38 | 59 | 7    | 54 | 3   | 58 | 7.24 | -373.8 | 214   | -325.8 | 189.4 | -398.6 | 113.1 | -359.7 | 190.3 | 0.78 | 0.03 | 0.78 | 0.08 | 0.78 | 0.03 | 0.78 | 0.03 | 4277 | 5187005 | Pseudoalteromonas atlantica T6c                               |
| CP000108 | 55.72 | 59 | 7.69 | 54 | 5.5 | 58 | 8.15 | -416.3 | 262.3 | -358.3 | 217.2 | -424.6 | 155.9 | -390.9 | 231.2 | 0.74 | 0.04 | 0.73 | 0.1  | 0.74 | 0.04 | 0.74 | 0.04 | 2000 | 2572079 | Chlorobium chlorochromatii CaD3                               |
| CP000655 | 55.17 | 59 | 7.28 | 54 | 2.9 | 58 | 7.45 | -381.4 | 223.9 | -346.7 | 201.7 | -404.1 | 134   | -382.7 | 198.2 | 0.76 | 0.03 | 0.76 | 0.08 | 0.76 | 0.04 | 0.76 | 0.03 | 2076 | 2159490 | Polynucleobacter necessarius subsp. asymbioticus QLW-P1DMWA-1 |
| AP009179 | 56.13 | 61 | 7.95 | 54 | 5.5 | 60 | 8.25 | -363   | 219.2 | -308.1 | 194.6 | -386   | 124   | -337.4 | 201.5 | 0.8  | 0.03 | 0.79 | 0.08 | 0.8  | 0.03 | 0.8  | 0.03 | 2436 | 2562277 | Sulfurovum sp. NBC37-1                                        |
| CP000503 | 55.37 | 59 | 7.3  | 54 | 3.8 | 58 | 7.32 | -383.7 | 228.1 | -343.7 | 201.3 | -404   | 142.4 | -377.2 | 201.3 | 0.75 | 0.03 | 0.75 | 0.08 | 0.75 | 0.03 | 0.75 | 0.03 | 4030 | 4708380 | Shewanella sp. W3-18-1                                        |
| CP000681 | 55.55 | 59 | 7.27 | 55 | 3.8 | 58 | 7.38 | -378.6 | 222.8 | -341.2 | 193.5 | -399.4 | 136.7 | -381.1 | 200.7 | 0.74 | 0.03 | 0.74 | 0.08 | 0.75 | 0.03 | 0.75 | 0.03 | 3960 | 4659220 | Shewanella putrefaciens CN-32                                 |
| CP000975 | 54.52 | 59 | 8.7  | 54 | 5   | 58 | 8.82 | -425.4 | 290.8 | -399.1 | 272   | -464.7 | 173.2 | -432   | 286.8 | 0.76 | 0.03 | 0.76 | 0.07 | 0.75 | 0.03 | 0.76 | 0.03 | 2212 | 2287145 | Methylacidiphilum infernum V4                                 |
| CP000387 | 56.60 | 64 | 7.88 | 55 | 4.7 | 60 | 7.67 | -363.9 | 227.1 | -309.2 | 197.3 | -386.7 | 139.2 | -330.5 | 195.9 | 0.78 | 0.03 | 0.79 | 0.08 | 0.78 | 0.03 | 0.78 | 0.03 | 2225 | 2388435 | Streptococcus sanguinis SK36                                  |
| CP000513 | 55.60 | 61 | 8.32 | 55 | 4.2 | 60 | 8.6  | -388.9 | 255.6 | -341.7 | 214.6 | -412.4 | 160.3 | -365.7 | 213.7 | 0.72 | 0.05 | 0.69 | 0.11 | 0.72 | 0.06 | 0.72 | 0.06 | 1262 | 1389350 | Dichelobacter nodosus VCS1703A                                |
| CP000082 | 57.20 | 59 | 7.06 | 55 | 3.4 | 60 | 7.49 | -372.6 | 232.2 | -329.3 | 193.1 | -400.9 | 129.5 | -360.4 | 198.6 | 0.78 | 0.04 | 0.78 | 0.09 | 0.78 | 0.04 | 0.78 | 0.04 | 2113 | 2650701 | Psychrobacter arcticus 273-4                                  |
| CP001145 | 55.23 | 59 | 6.55 | 55 | 2.9 | 58 | 6.64 | -372.5 | 229.4 | -346.4 | 225.5 | -394.8 | 140.9 | -344.5 | 208.9 | 0.82 | 0.02 | 0.84 | 0.06 | 0.82 | 0.02 | 0.82 | 0.02 | 1403 | 1424912 | Coprothermobacter proteolyticus DSM 5265                      |
| CP000961 | 56.30 | 61 | 7.24 | 55 | 3.5 | 60 | 8.86 | -372.8 | 246.8 | -324.2 | 192.8 | -389   | 133.9 | -363.4 | 200.3 | 0.78 | 0.02 | 0.79 | 0.07 | 0.78 | 0.03 | 0.78 | 0.02 | 4863 | 5935403 | Shewanella woodyi ATCC 51908                                  |
| BA000004 | 56.31 | 61 | 7.08 | 55 | 3.7 | 60 | 7.21 | -348.4 | 214.4 | -301.6 | 203.1 | -367.1 | 119.8 | -347.4 | 199.5 | 0.8  | 0.02 | 0.81 | 0.07 | 0.8  | 0.03 | 0.8  | 0.02 | 3952 | 4202352 | Bacillus halodurans C-125                                     |
| CP000323 | 57.71 | 61 | 7.26 | 55 | 3.3 | 60 | 7.57 | -366.4 | 218.9 | -331.8 | 190   | -392.8 | 128.3 | -355.4 | 194.5 | 0.77 | 0.04 | 0.78 | 0.09 | 0.78 | 0.04 | 0.78 | 0.04 | 2467 | 3059876 | Psychrobacter cryohalolentis K5                               |
| CR626927 | 56.81 | 64 | 7.94 | 55 | 5.8 | 62 | 8.7  | -351.8 | 223   | -325.1 | 193   | -379.1 | 142.3 | -314.8 | 192.4 | 0.79 | 0.03 | 0.79 | 0.07 | 0.79 | 0.03 | 0.79 | 0.03 | 4147 | 5205140 | Bacteroides fragilis NCTC 9343                                |
| CP001707 | 56.31 | 61 | 7.13 | 55 | 3.6 | 60 | 7.34 | -368.2 | 220.7 | -334.7 | 189.5 | -390.7 | 136.8 | -351   | 202.2 | 0.77 | 0.03 | 0.78 | 0.08 | 0.77 | 0.03 | 0.77 | 0.03 | 2615 | 2852073 | Kangiella korensis DSM 16069                                  |
| AE015928 | 57.16 | 64 | 7.98 | 55 | 5.4 | 62 | 8.31 | -350.2 | 221.8 | -326.3 | 185   | -372.2 | 131.2 | -316.3 | 191.4 | 0.79 | 0.03 | 0.78 | 0.08 | 0.79 | 0.03 | 0.79 | 0.03 | 4773 | 6260361 | Bacteroides thetaiotaomicron VPI-5482                         |
| AP006841 | 56.73 | 64 | 7.87 | 55 | 5.9 | 62 | 8.73 | -351.1 | 232.6 | -328.6 | 193.9 | -373.5 | 207.3 | -318.9 | 250.1 | 0.79 | 0.03 | 0.79 | 0.07 | 0.8  | 0.04 | 0.8  | 0.03 | 4577 | 5277274 | Bacteroides fragilis YCH46                                    |
| AL009126 | 56.49 | 61 | 7.64 | 55 | 4.8 | 62 | 8    | -342.6 | 209   | -291.6 | 187.7 | -352.6 | 115.1 | -360.9 | 205.5 | 0.79 | 0.02 | 0.81 | 0.07 | 0.79 | 0.03 | 0.79 | 0.03 | 4107 | 4215606 | Bacillus subtilis subsp. subtilis str. 168                    |
| CP000472 | 56.71 | 61 | 7.18 | 56 | 3.3 | 60 | 6.95 | -374.4 | 216   | -328.8 | 191.7 | -393.4 | 128.4 | -373   | 194.3 | 0.77 | 0.03 | 0.78 | 0.07 | 0.77 | 0.03 | 0.77 | 0.03 | 4541 | 5396476 | Shewanella piezotolerans WP3                                  |
| CP000109 | 56.87 | 61 | 7.06 | 56 | 3.5 | 60 | 7.32 | -385   | 232.6 | -339   | 203.6 | -407.6 | 150.3 | -376.2 | 202.5 | 0.77 | 0.03 | 0.77 | 0.09 | 0.77 | 0.03 | 0.77 | 0.03 | 2193 | 2427734 | Thiomicrospira crunigena XCL-2                                |
| AE000657 | 56.52 | 59 | 7.46 | 56 | 3.9 | 60 | 7.36 | -355.4 | 245.6 | -350.1 | 221.8 | -393   | 121.7 | -350.8 | 227.7 | 0.76 | 0.04 | 0.75 | 0.1  | 0.76 | 0.04 | 0.76 | 0.04 | 1521 | 1551335 | Aquifex aeolicus VF5                                          |
| BX470251 | 57.17 | 61 | 8.61 | 56 | 6   | 60 | 8.69 | -363.1 | 236.3 | -331.7 | 203.5 | -378.1 | 161   | -352.5 | 206.7 | 0.77 | 0.04 | 0.78 | 0.08 | 0.77 | 0.04 | 0.77 | 0.04 | 4643 | 5688987 | Photorhabdus luminescens subsp. laumondii TTO1                |
| CP001673 | 57.31 | 64 | 8.05 | 56 | 4.2 | 62 | 8.43 | -356.3 | 200.9 | -342   | 177.6 | -379.2 | 106.6 | -345   | 183.7 | 0.8  | 0.02 | 0.79 | 0.08 | 0.81 | 0.03 | 0.81 | 0.02 | 2444 | 2768102 | Flavobacteriaceae bacterium 3519-10                           |
| AE016827 | 57.46 | 64 | 7.9  | 56 | 4.3 | 62 | 8.28 | -362.1 | 209.8 | -334.5 | 184.9 | -378.9 | 117.3 | -368   | 189.8 | 0.73 | 0.04 | 0.71 | 0.11 | 0.73 | 0.04 | 0.73 | 0.04 | 2139 | 2314078 | Mannheimia succiniciproducens MBEL55E                         |
| AE016828 | 57.34 | 61 | 8.57 | 56 | 5   | 60 | 8.94 | -363.3 | 227.4 | -341.3 | 201.8 | -389.5 | 144.9 | -372.7 | 217.5 | 0.76 | 0.03 | 0.75 | 0.09 | 0.76 | 0.04 | 0.76 | 0.04 | 1669 | 1995281 | Coxiella burnetii RSA 493                                     |
| CP001019 | 57.37 | 61 | 8.68 | 56 | 4.8 | 60 | 8.93 | -352.5 | 226.7 | -339.5 | 198.3 | -372.9 | 145   | -355.6 | 212.1 | 0.76 | 0.04 | 0.75 | 0.09 | 0.76 | 0.04 | 0.76 | 0.04 | 1706 | 2008870 | Coxiella burnetii CbuG_Q212                                   |
| CP000890 | 57.24 | 61 | 8.58 | 56 | 5.1 |    |      |        |       |        |       |        |       |        |       |      |      |      |      |      |      |      |      |      |         |                                                               |

|          |       |    |      |    |     |    |      |        |       |        |       |        |       |        |       |      |      |      |      |      |      |      |      |      |         |                                                          |
|----------|-------|----|------|----|-----|----|------|--------|-------|--------|-------|--------|-------|--------|-------|------|------|------|------|------|------|------|------|------|---------|----------------------------------------------------------|
| CP000922 | 58.22 | 61 | 7.56 | 58 | 4.3 | 62 | 7.84 | -352.7 | 220.5 | -325.9 | 231.5 | -367.8 | 127.3 | -372.4 | 216.6 | 0.75 | 0.04 | 0.74 | 0.11 | 0.75 | 0.05 | 0.75 | 0.04 | 2784 | 2846746 | Anoxybacillus flavithermus WK1                           |
| CR936503 | 58.74 | 64 | 7.29 | 58 | 3.5 | 62 | 7.26 | -370.4 | 223.5 | -318   | 185.3 | -387.7 | 136.7 | -354.7 | 193.5 | 0.72 | 0.05 | 0.74 | 0.11 | 0.72 | 0.05 | 0.72 | 0.05 | 1836 | 1884661 | Lactobacillus sakei subsp. sakei 23K                     |
| AM946016 | 58.70 | 64 | 7.17 | 57 | 4.5 | 62 | 7.3  | -349.4 | 218.6 | -295.6 | 187.9 | -366.9 | 132.6 | -332.1 | 195.5 | 0.73 | 0.04 | 0.76 | 0.08 | 0.73 | 0.04 | 0.73 | 0.04 | 1801 | 2007491 | Streptococcus suis P1/7                                  |
| FM252032 | 58.94 | 66 | 7.14 | 58 | 4.5 | 62 | 7.38 | -364.1 | 218.5 | -310.7 | 194.8 | -385.1 | 131.8 | -346.1 | 200.7 | 0.73 | 0.04 | 0.76 | 0.08 | 0.73 | 0.04 | 0.73 | 0.04 | 1910 | 2146229 | Streptococcus suis BM407                                 |
| FM252031 | 58.89 | 66 | 7.17 | 58 | 4.5 | 62 | 7.37 | -347.6 | 217.1 | -291.7 | 186.2 | -362.6 | 131.3 | -329.2 | 195   | 0.73 | 0.04 | 0.76 | 0.08 | 0.73 | 0.04 | 0.73 | 0.04 | 1874 | 2095898 | Streptococcus suis SC84                                  |
| CP000407 | 58.89 | 64 | 7.86 | 58 | 4.7 | 62 | 7.67 | -347.7 | 218.3 | -308.1 | 202.3 | -360   | 134.6 | -328.5 | 196.8 | 0.73 | 0.04 | 0.75 | 0.09 | 0.73 | 0.04 | 0.73 | 0.04 | 2074 | 2096309 | Streptococcus suis 05ZYH33                               |
| CP000813 | 58.71 | 64 | 7.11 | 58 | 3.8 | 62 | 7.19 | -336   | 206.5 | -286.1 | 189.4 | -346.1 | 117   | -361.9 | 200.8 | 0.75 | 0.03 | 0.77 | 0.08 | 0.75 | 0.03 | 0.75 | 0.03 | 3621 | 3704465 | Bacillus pumilus SAFR-03                                 |
| CP001431 | 58.73 | 61 | 7.19 | 58 | 3.3 | 60 | 7.04 | -338.7 | 231.3 | -329.6 | 240.1 | -362.6 | 173.4 | -327.5 | 237.2 | 0.76 | 0.02 | 0.78 | 0.07 | 0.76 | 0.03 | 0.76 | 0.02 | 820  | 879977  | Neorickettsia risticii str. Illinois                     |
| CP000408 | 58.89 | 64 | 7.78 | 58 | 4.7 | 62 | 7.52 | -347.7 | 217.2 | -304.4 | 194   | -360.5 | 132.9 | -331.9 | 192.7 | 0.73 | 0.04 | 0.75 | 0.09 | 0.73 | 0.04 | 0.73 | 0.04 | 2086 | 2095698 | Streptococcus suis 98HAH33                               |
| AM884176 | 58.67 | 61 | 7.05 | 58 | 2.5 | 62 | 6.85 | -371.5 | 251.3 | -340.7 | 222.6 | -380.4 | 164.3 | -375.3 | 251.3 | 0.7  | 0.03 | 0.7  | 0.08 | 0.69 | 0.03 | 0.7  | 0.03 | 870  | 1038842 | Chlamydia trachomatis 434/Bu                             |
| CP000921 | 60.23 | 66 | 7.46 | 58 | 4.6 | 64 | 7.32 | -364.4 | 219.2 | -310.8 | 194   | -383.7 | 136.1 | -348   | 199.2 | 0.73 | 0.04 | 0.76 | 0.09 | 0.73 | 0.05 | 0.73 | 0.05 | 1951 | 2112148 | Streptococcus pneumoniae Taiwan19F-14                    |
| FM872308 | 58.70 | 61 | 7.01 | 58 | 2.5 | 62 | 6.74 | -371   | 251.2 | -339.4 | 220   | -377.8 | 163.1 | -372.2 | 246.7 | 0.69 | 0.03 | 0.7  | 0.08 | 0.69 | 0.03 | 0.69 | 0.03 | 871  | 1044352 | Chlamydia trachomatis B/Jal210/OT                        |
| CP000051 | 58.70 | 61 | 7.01 | 58 | 2.6 | 61 | 6.88 | -371   | 251.6 | -341.1 | 223.8 | -382.6 | 165.5 | -378.7 | 250.4 | 0.7  | 0.03 | 0.7  | 0.08 | 0.69 | 0.03 | 0.7  | 0.03 | 908  | 1044459 | Chlamydia trachomatis A/HAR-13                           |
| CP000410 | 60.29 | 66 | 7.46 | 58 | 4.7 | 64 | 7.27 | -363.9 | 217.5 | -316.4 | 194.1 | -383.5 | 130.9 | -352.6 | 202.5 | 0.72 | 0.04 | 0.76 | 0.09 | 0.72 | 0.04 | 0.72 | 0.04 | 1857 | 2046115 | Streptococcus pneumoniae D39                             |
| AE001273 | 58.69 | 61 | 7.09 | 58 | 2.5 | 62 | 6.77 | -370.6 | 251.7 | -338.3 | 223.4 | -379.7 | 163.8 | -382   | 249.4 | 0.7  | 0.03 | 0.7  | 0.08 | 0.69 | 0.03 | 0.7  | 0.03 | 890  | 1042519 | Chlamydia trachomatis D/UW-3/CX                          |
| CP000237 | 58.92 | 61 | 7.03 | 58 | 3.4 | 60 | 7.21 | -337.8 | 228.3 | -345.9 | 240.5 | -362.5 | 172.4 | -337.2 | 235.2 | 0.76 | 0.02 | 0.77 | 0.07 | 0.76 | 0.03 | 0.76 | 0.03 | 819  | 859006  | Neorickettsia sennetsu str. Miyayama                     |
| AM884177 | 58.67 | 61 | 7.03 | 58 | 2.5 | 62 | 6.85 | -371.5 | 251.4 | -340.8 | 222.4 | -380.6 | 164.4 | -376.4 | 252.9 | 0.7  | 0.03 | 0.7  | 0.08 | 0.69 | 0.03 | 0.7  | 0.03 | 870  | 1038869 | Chlamydia trachomatis L2b/UCh-1/proctitis                |
| CR543861 | 59.57 | 61 | 7.37 | 58 | 4.2 | 62 | 7.72 | -372.8 | 209.2 | -341.9 | 176.4 | -388.1 | 122.4 | -378.6 | 181.8 | 0.72 | 0.03 | 0.72 | 0.1  | 0.72 | 0.04 | 0.72 | 0.03 | 3246 | 3598621 | Acinetobacter sp. ADP1                                   |
| CP001634 | 58.45 | 64 | 6.89 | 58 | 3.5 | 62 | 7.07 | -360.8 | 215.5 | -318   | 221.3 | -381.5 | 118.9 | -330.9 | 202.4 | 0.77 | 0.03 | 0.78 | 0.07 | 0.77 | 0.03 | 0.77 | 0.03 | 2082 | 2302126 | Kosmotoga olearia TBF 19.5.1                             |
| CP000920 | 60.25 | 66 | 7.36 | 58 | 4.7 | 64 | 7.29 | -362.4 | 217.4 | -317.7 | 195.6 | -383.1 | 136.6 | -349.5 | 203.9 | 0.72 | 0.04 | 0.76 | 0.09 | 0.73 | 0.05 | 0.73 | 0.04 | 1978 | 2111882 | Streptococcus pneumoniae P1031                           |
| CP001015 | 60.35 | 66 | 7.45 | 58 | 4.7 | 64 | 7.45 | -357.5 | 214.2 | -314.6 | 192.6 | -373.2 | 132.4 | -346.6 | 200.7 | 0.73 | 0.04 | 0.76 | 0.08 | 0.73 | 0.05 | 0.73 | 0.04 | 2027 | 2078953 | Streptococcus pneumoniae G54                             |
| CP000919 | 60.26 | 66 | 7.51 | 58 | 4.7 | 64 | 7.38 | -357.8 | 217.3 | -313.9 | 193.8 | -374.1 | 136.9 | -347.9 | 203.6 | 0.73 | 0.04 | 0.76 | 0.09 | 0.72 | 0.05 | 0.73 | 0.04 | 2020 | 2120234 | Streptococcus pneumoniae JJA                             |
| CP000918 | 60.27 | 66 | 7.51 | 58 | 4.7 | 64 | 7.35 | -362   | 217.8 | -325.4 | 197.3 | -382.4 | 136.9 | -353.8 | 204.3 | 0.73 | 0.04 | 0.76 | 0.09 | 0.72 | 0.04 | 0.73 | 0.04 | 2090 | 2184682 | Streptococcus pneumoniae 70585                           |
| FM211187 | 60.51 | 66 | 7.47 | 58 | 4.8 | 64 | 7.42 | -356.4 | 216.8 | -304.8 | 192.4 | -371.4 | 132.8 | -343.4 | 202.4 | 0.73 | 0.04 | 0.77 | 0.08 | 0.73 | 0.04 | 0.73 | 0.04 | 1964 | 2221315 | Streptococcus pneumoniae ATCC 700669                     |
| AE004439 | 59.60 | 64 | 7.02 | 58 | 3.5 | 62 | 7.32 | -367.7 | 221.5 | -338.6 | 189.6 | -386.4 | 127.1 | -379.7 | 188.1 | 0.7  | 0.04 | 0.7  | 0.11 | 0.7  | 0.05 | 0.7  | 0.05 | 2011 | 2257487 | Pasteurella multocida subsp. multocida str. Pm70         |
| CP000936 | 60.37 | 66 | 7.34 | 58 | 4.7 | 64 | 7.37 | -360.6 | 216.5 | -316.3 | 194.5 | -381.2 | 134.8 | -349.2 | 203.4 | 0.73 | 0.04 | 0.76 | 0.09 | 0.73 | 0.05 | 0.73 | 0.04 | 2059 | 2245615 | Streptococcus pneumoniae Hungary19A-6                    |
| AE005672 | 60.30 | 66 | 7.42 | 58 | 4.8 | 64 | 7.25 | -361.5 | 215.7 | -317.2 | 198.7 | -381.2 | 133.1 | -352   | 204.1 | 0.73 | 0.04 | 0.76 | 0.09 | 0.73 | 0.05 | 0.73 | 0.04 | 1973 | 2160842 | Streptococcus pneumoniae TRG4                            |
| AE007317 | 60.28 | 66 | 7.54 | 58 | 4.8 | 64 | 7.32 | -363.8 | 217.5 | -318.8 | 196.5 | -382.8 | 134.1 | -356.3 | 204.6 | 0.72 | 0.04 | 0.75 | 0.09 | 0.72 | 0.05 | 0.73 | 0.04 | 2015 | 2038615 | Streptococcus pneumoniae R6                              |
| CP000725 | 59.49 | 66 | 7.54 | 58 | 4.8 | 64 | 7.74 | -360.4 | 217.9 | -322.1 | 191.5 | -378.8 | 135.3 | -350   | 191.9 | 0.74 | 0.04 | 0.77 | 0.08 | 0.74 | 0.04 | 0.74 | 0.04 | 2002 | 2196662 | Streptococcus gordonii str. Challis substr. CH1          |
| CP001033 | 60.54 | 66 | 7.44 | 59 | 4.8 | 64 | 7.58 | -360.9 | 214.6 | -318.6 | 192.3 | -380.4 | 131.5 | -349.3 | 202.3 | 0.73 | 0.04 | 0.76 | 0.09 | 0.73 | 0.04 | 0.73 | 0.04 | 2100 | 2209198 | Streptococcus pneumoniae CGSP14                          |
| CP000510 | 59.91 | 64 | 7.45 | 59 | 4   | 62 | 8.04 | -356.4 | 209.1 | -316.2 | 175.9 | -373.8 | 114.5 | -353.2 | 185.9 | 0.72 | 0.04 | 0.74 | 0.09 | 0.72 | 0.04 | 0.72 | 0.04 | 3534 | 4559598 | Psychromonas ingrahamii 37                               |
| CP001227 | 59.67 | 64 | 9.82 | 59 | 6.5 | 62 | 9.22 | -362.2 | 220.6 | -345.5 | 206.7 | -383.1 | 127.1 | -360.6 | 197.6 | 0.74 | 0.04 | 0.75 | 0.09 | 0.75 | 0.05 | 0.75 | 0.05 | 1889 | 2110331 | Candidatus Hamiltonella defensa 5AT (Acyrtosiphon pisum) |
| CP001321 | 60.61 | 64 | 7.37 | 59 | 4.2 | 64 | 7.67 | -371.3 | 222.5 | -352   | 188.7 | -382.9 | 125.4 | -366.7 | 203.9 | 0.72 | 0.05 | 0.74 | 0.1  | 0.72 | 0.05 | 0.72 | 0.05 | 1957 | 2269156 | Haemophilus parasuis SH0165                              |
| AE002161 | 59.43 | 61 | 7.67 | 59 | 3   | 62 | 7.53 | -374.1 | 240.9 | -344.3 | 209.8 | -390.5 | 147.2 | -369.1 | 222.2 | 0.71 | 0.03 | 0.73 | 0.08 | 0.71 | 0.03 | 0.71 | 0.03 | 1053 | 1229853 | Chlamydomphila pneumoniae AR39                           |
| BA000008 | 59.42 | 61 | 7.66 | 59 | 2.8 | 62 | 7.5  | -368.3 | 242.2 | -337.3 | 210.7 | -386.7 | 146.3 | -365.7 | 225.1 | 0.71 | 0.03 | 0.73 | 0.08 | 0.71 | 0.03 | 0.71 | 0.03 | 1065 | 1226565 | Chlamydomphila pneumoniae J138                           |
| AE001363 | 59.42 | 61 | 7.6  | 59 | 2.9 | 62 | 7.51 | -368.6 | 242.1 | -336   | 209.7 | -386.8 | 145.7 | -366.2 | 219.9 | 0.71 | 0.03 | 0.73 | 0.08 | 0.71 | 0.03 | 0.71 | 0.03 | 1048 | 1230230 | Chlamydomphila pneumoniae CWL029                         |
| AE009440 | 59.42 | 61 | 7.74 | 59 | 3.4 | 62 | 7.6  | -368.4 | 242   | -345.2 | 216.4 | -388.1 | 150.2 | -367.8 | 226.5 | 0.71 | 0.03 | 0.73 | 0.08 | 0.71 | 0.03 | 0.71 | 0.03 | 1109 | 1225935 | Chlamydomphila pneumoniae TW-183                         |
| AE002160 | 59.66 | 61 | 6.98 | 59 | 2.6 | 62 | 6.86 | -379   | 258.6 | -351.1 | 232.1 | -394.9 | 171   | -400.3 | 256.3 | 0.69 | 0.03 | 0.68 | 0.09 | 0.69 | 0.03 | 0.69 | 0.03 | 882  | 1072950 | Chlamydia muridarum Nigg                                 |
| CP001055 | 60.05 | 68 | 8.75 | 59 | 3.9 | 67 | 9.2  | -376.9 | 211.8 | -341.6 | 191.1 | -392.8 | 111   | -371.4 | 187.7 | 0.77 | 0.04 | 0.8  | 0.1  | 0.77 | 0.04 | 0.77 | 0.04 | 2131 | 1643562 | Elusimicrobium minutum Pei191                            |
| CP001632 | 60.41 | 68 | 7.43 | 59 | 4.6 | 67 | 7.54 | -358.2 | 238.7 | -337.8 | 191.9 | -374.9 | 148.5 | -336.2 | 201.2 | 0.75 | 0.04 | 0.77 | 0.08 | 0.75 | 0.04 | 0.75 | 0.04 | 2134 | 2612925 | Capnocytophaga ochracea DSM 7271                         |
| AM942759 | 61.10 | 64 | 8.35 | 59 | 4.9 | 63 | 8.31 | -364.2 | 205.4 | -339.5 | 175.6 | -377.6 | 117.6 | -365.3 | 182.7 | 0.7  | 0.05 | 0.69 | 0.11 | 0.7  | 0.05 | 0.7  | 0.05 | 3582 | 4063606 | Proteus mirabilis HI4320                                 |
| CP000792 | 60.57 | 66 | 7.96 | 59 | 5.2 | 64 | 8.21 | -346.5 | 208.2 | -316.3 | 195.5 | -361   | 112.6 | -343.7 | 201.2 | 0.73 | 0.03 | 0.74 | 0.09 | 0.73 | 0.04 | 0.73 | 0.04 | 1945 | 2052007 | Campylobacter concisus 13826                             |
| AM260525 | 61.14 | 64 | 7.82 | 59 | 4.1 | 62 | 8.1  | -339.6 | 231.5 | -314.6 | 212.6 | -361.7 | 155.2 | -334.3 | 208.9 | 0.7  | 0.04 | 0.7  | 0.1  | 0.7  | 0.05 | 0.7  | 0.04 | 2095 | 2619061 | Bartonella tribocorum CIP 105476                         |
| BX897700 | 61.20 | 64 | 7.77 | 59 | 3   | 62 | 7.33 | -350.6 | 236.1 | -321.8 | 207.4 | -376.1 | 154.8 | -355.6 | 213   | 0.69 | 0.04 | 0.68 | 0.1  | 0.69 | 0.04 | 0.69 | 0.04 | 1138 | 1581384 | Bartonella quintana str. Toulouse                        |
| AP010935 | 60.42 | 66 | 6.76 | 59 | 3.7 | 64 | 6.85 | -358.5 | 210   | -315.9 | 176.9 | -372.8 | 119.9 | -355.9 | 194.9 | 0.72 | 0.04 | 0.75 | 0.09 | 0.72 | 0.04 | 0.72 | 0.04 | 2058 | 2106340 | Streptococcus dysgalactiae subsp. equisimilis GGS_124    |
| U00089   | 59.99 | 64 | 7.73 | 59 | 5   | 64 | 7.93 | -404.7 | 226.9 | -386.2 | 205.8 | -415.2 | 113.8 | -385.7 | 202.1 | 0.72 | 0.03 | 0.73 | 0.09 | 0.73 | 0.04 | 0.73 | 0.03 | 685  | 816394  | Mycoplasma pneumoniae M129                               |
| CP001701 | 60.18 | 61 | 7.8  | 59 | 5.4 | 64 | 7.78 | -372.9 | 223.9 | -343.6 | 204.3 | -393.5 | 124.2 | -375.3 | 203.7 | 0.69 | 0.05 | 0.69 | 0.1  | 0.69 | 0.05 | 0.69 | 0.05 | 4218 | 4669813 | Cyanotheca sp. PCC 8802                                  |
| CP001287 | 60.24 | 61 | 7.86 | 59 |     |    |      |        |       |        |       |        |       |        |       |      |      |      |      |      |      |      |      |      |         |                                                          |



|          |       |    |      |    |     |    |      |        |       |        |       |        |       |        |       |      |      |      |      |      |      |      |      |      |         |                                                                        |
|----------|-------|----|------|----|-----|----|------|--------|-------|--------|-------|--------|-------|--------|-------|------|------|------|------|------|------|------|------|------|---------|------------------------------------------------------------------------|
| AE015925 | 60.78 | 64 | 7.25 | 60 | 2.6 | 62 | 7.17 | -367.7 | 229.9 | -347   | 210.7 | -388.2 | 133   | -371.1 | 210.3 | 0.68 | 0.03 | 0.69 | 0.09 | 0.68 | 0.03 | 0.68 | 0.03 | 974  | 1173390 | <i>Chlamydomypha caviae</i> GPIC                                       |
| CP000705 | 61.13 | 66 | 7.15 | 60 | 3.4 | 64 | 7.28 | -352.6 | 205.7 | -312.1 | 176.6 | -365.7 | 116   | -325.2 | 191.9 | 0.71 | 0.04 | 0.74 | 0.1  | 0.71 | 0.05 | 0.71 | 0.04 | 1884 | 1999618 | <i>Lactobacillus reuteri</i> DSM 20016                                 |
| CP001217 | 61.19 | 66 | 7.34 | 60 | 3.9 | 64 | 7.26 | -390.1 | 253.3 | -367.7 | 258.5 | -422.2 | 144   | -389.5 | 244.7 | 0.71 | 0.03 | 0.71 | 0.1  | 0.71 | 0.04 | 0.71 | 0.03 | 1544 | 1673813 | <i>Helicobacter pylori</i> P12                                         |
| CP000524 | 61.76 | 64 | 7.68 | 60 | 3.7 | 64 | 7.55 | -384.3 | 246.8 | -355.3 | 232.9 | -415.9 | 169.7 | -381.1 | 218.9 | 0.69 | 0.04 | 0.68 | 0.11 | 0.69 | 0.05 | 0.69 | 0.04 | 1185 | 1445021 | <i>Bartonella bacilliformis</i> KC583                                  |
| CP001291 | 61.39 | 64 | 7.76 | 60 | 4.7 | 64 | 7.94 | -371.7 | 236.4 | -345.6 | 209.1 | -389.5 | 132.2 | -381.7 | 218.3 | 0.69 | 0.05 | 0.67 | 0.11 | 0.69 | 0.05 | 0.69 | 0.05 | 5098 | 5942652 | <i>Cyanothece</i> sp. PCC 7424                                         |
| AM295007 | 61.37 | 66 | 6.75 | 60 | 3.8 | 64 | 7.18 | -359.7 | 210   | -318.6 | 180.9 | -376.1 | 119.9 | -340.8 | 195.5 | 0.71 | 0.04 | 0.74 | 0.09 | 0.71 | 0.04 | 0.71 | 0.04 | 1712 | 1841271 | <i>Streptococcus pyogenes</i> str. Manfreda                            |
| CP000003 | 61.31 | 66 | 6.85 | 60 | 4   | 64 | 7.13 | -357.9 | 210.8 | -317.7 | 187.8 | -375.5 | 124.9 | -356.1 | 198.6 | 0.71 | 0.04 | 0.73 | 0.1  | 0.71 | 0.05 | 0.71 | 0.04 | 1830 | 1899877 | <i>Streptococcus pyogenes</i> MGAS10394                                |
| AE000492 | 61.49 | 66 | 6.83 | 61 | 3.8 | 64 | 7.25 | -362.7 | 209.9 | -326.2 | 182.2 | -383.7 | 121.1 | -358.8 | 194.3 | 0.71 | 0.04 | 0.74 | 0.09 | 0.71 | 0.04 | 0.71 | 0.04 | 1682 | 1852441 | <i>Streptococcus pyogenes</i> M1 GAS                                   |
| CP000261 | 61.27 | 66 | 7.16 | 60 | 4.1 | 64 | 7.26 | -361.2 | 211.3 | -320.9 | 191   | -382.6 | 126.1 | -357.2 | 196.3 | 0.71 | 0.04 | 0.73 | 0.1  | 0.72 | 0.05 | 0.72 | 0.05 | 1831 | 1860355 | <i>Streptococcus pyogenes</i> MGAS2096                                 |
| CP000829 | 61.43 | 66 | 6.88 | 61 | 3.9 | 64 | 7.11 | -363.8 | 212.6 | -324.9 | 184.7 | -386   | 121.9 | -359.2 | 194.5 | 0.71 | 0.04 | 0.74 | 0.09 | 0.71 | 0.04 | 0.71 | 0.04 | 1684 | 1815785 | <i>Streptococcus pyogenes</i> NZ131                                    |
| CP000017 | 61.47 | 66 | 6.98 | 61 | 3.9 | 64 | 7.2  | -360.8 | 209   | -324.7 | 182.5 | -382.1 | 126.5 | -353.3 | 196.2 | 0.71 | 0.04 | 0.74 | 0.1  | 0.71 | 0.04 | 0.71 | 0.04 | 1796 | 1838554 | <i>Streptococcus pyogenes</i> MGAS5005                                 |
| CP000383 | 61.15 | 66 | 7.45 | 60 | 4.3 | 67 | 8.16 | -347.8 | 200.1 | -335.7 | 168.9 | -360.8 | 101.4 | -344.5 | 173.8 | 0.73 | 0.03 | 0.73 | 0.09 | 0.73 | 0.03 | 0.73 | 0.03 | 3785 | 4433218 | <i>Cytophaga hutchinsonii</i> ATCC 33406                               |
| AE009949 | 61.45 | 66 | 6.82 | 60 | 3.9 | 64 | 7.26 | -359.5 | 209.4 | -323.5 | 180.8 | -379.6 | 120.5 | -347.8 | 192.6 | 0.71 | 0.04 | 0.74 | 0.09 | 0.71 | 0.04 | 0.71 | 0.04 | 1806 | 1895017 | <i>Streptococcus pyogenes</i> MGAS8232                                 |
| AE014074 | 61.41 | 66 | 7.02 | 61 | 3.9 | 64 | 7.17 | -358.8 | 209.1 | -317.7 | 185.2 | -373.3 | 121.6 | -342.3 | 191.8 | 0.71 | 0.04 | 0.74 | 0.09 | 0.71 | 0.04 | 0.71 | 0.04 | 1851 | 1900521 | <i>Streptococcus pyogenes</i> MGAS315                                  |
| BA000034 | 61.45 | 66 | 7.02 | 61 | 3.8 | 64 | 7.14 | -362.9 | 210   | -323.6 | 195.4 | -379.1 | 121.6 | -347.8 | 195.1 | 0.71 | 0.04 | 0.74 | 0.09 | 0.71 | 0.04 | 0.71 | 0.04 | 1817 | 1894275 | <i>Streptococcus pyogenes</i> SSI-1                                    |
| CP000259 | 61.46 | 66 | 6.81 | 61 | 4   | 64 | 7.14 | -363.6 | 210.6 | -323.4 | 189.5 | -385.7 | 125.8 | -362.7 | 193.6 | 0.71 | 0.04 | 0.73 | 0.1  | 0.71 | 0.05 | 0.71 | 0.04 | 1785 | 1836467 | <i>Streptococcus pyogenes</i> MGAS9429                                 |
| CP000260 | 61.57 | 66 | 6.94 | 61 | 4.1 | 64 | 7.08 | -360.3 | 212.5 | -320.3 | 189.8 | -379.7 | 126.7 | -356.8 | 193.4 | 0.71 | 0.04 | 0.73 | 0.1  | 0.71 | 0.05 | 0.71 | 0.04 | 1906 | 1928252 | <i>Streptococcus pyogenes</i> MGAS10270                                |
| CP000056 | 61.65 | 66 | 6.96 | 61 | 4.1 | 64 | 7.21 | -358.8 | 214   | -316.3 | 185.5 | -376.9 | 126.7 | -352.6 | 197.4 | 0.71 | 0.04 | 0.73 | 0.1  | 0.71 | 0.04 | 0.71 | 0.04 | 1832 | 1897573 | <i>Streptococcus pyogenes</i> MGAS6180                                 |
| CR628336 | 61.63 | 66 | 7.27 | 61 | 3.4 | 64 | 7.71 | -347.9 | 200.6 | -319.2 | 176.9 | -364.9 | 113   | -349.1 | 179.3 | 0.74 | 0.03 | 0.75 | 0.09 | 0.73 | 0.03 | 0.74 | 0.03 | 3012 | 3503610 | <i>Legionella pneumophila</i> str. Paris                               |
| CR628337 | 61.58 | 66 | 7.28 | 61 | 3.5 | 64 | 7.67 | -350   | 200   | -319.8 | 177   | -366.4 | 115.6 | -352.9 | 180   | 0.74 | 0.03 | 0.75 | 0.09 | 0.73 | 0.03 | 0.74 | 0.03 | 2863 | 3345687 | <i>Legionella pneumophila</i> str. Lens                                |
| CP000675 | 61.52 | 66 | 7.42 | 61 | 3.6 | 64 | 7.64 | -350.4 | 199.4 | -325   | 178.9 | -367.8 | 115.9 | -351.2 | 176.9 | 0.74 | 0.03 | 0.75 | 0.08 | 0.74 | 0.03 | 0.74 | 0.03 | 3131 | 3576470 | <i>Legionella pneumophila</i> str. Corby                               |
| CP001098 | 62.12 | 66 | 8.7  | 61 | 4.8 | 67 | 8.71 | -346   | 215.1 | -284.7 | 204.7 | -364.3 | 126.3 | -321.5 | 190.5 | 0.73 | 0.03 | 0.74 | 0.09 | 0.73 | 0.03 | 0.73 | 0.03 | 2325 | 2578146 | <i>Halothrix orei</i> H 168                                            |
| CP000262 | 61.68 | 66 | 6.97 | 61 | 4.2 | 64 | 7.15 | -363.5 | 213   | -320.3 | 191.6 | -382.6 | 124   | -372.8 | 195.7 | 0.71 | 0.04 | 0.73 | 0.09 | 0.71 | 0.05 | 0.71 | 0.04 | 1908 | 1937111 | <i>Streptococcus pyogenes</i> MGAS10750                                |
| CP000878 | 61.99 | 61 | 7.92 | 61 | 4.1 | 64 | 7.78 | -349.6 | 210.5 | -364.2 | 202.3 | -356.8 | 136.3 | -360   | 192.2 | 0.72 | 0.04 | 0.7  | 0.1  | 0.72 | 0.04 | 0.72 | 0.04 | 1813 | 1688963 | <i>Prochlorococcus marinus</i> str. MIT 9211                           |
| L42023   | 61.85 | 66 | 7.45 | 61 | 3.7 | 67 | 7.21 | -352.5 | 249.4 | -341.1 | 182.5 | -366.6 | 116.1 | -366.1 | 177   | 0.71 | 0.05 | 0.71 | 0.12 | 0.71 | 0.05 | 0.71 | 0.05 | 1687 | 1830138 | <i>Haemophilus influenzae</i> Rd KW20                                  |
| AE017354 | 61.73 | 66 | 7.36 | 61 | 3.5 | 64 | 7.63 | -350.4 | 199.3 | -325.7 | 175.2 | -368.2 | 112.1 | -352.6 | 178.5 | 0.73 | 0.03 | 0.74 | 0.09 | 0.73 | 0.03 | 0.73 | 0.03 | 2926 | 3397754 | <i>Legionella pneumophila</i> subsp. pneumophila str. Philadelphia 1   |
| CP000057 | 61.84 | 66 | 7.26 | 61 | 3.7 | 67 | 7.4  | -358.5 | 219.5 | -347.8 | 264.6 | -372.8 | 115.4 | -364.9 | 179   | 0.71 | 0.05 | 0.71 | 0.11 | 0.71 | 0.06 | 0.71 | 0.05 | 1772 | 1914490 | <i>Haemophilus influenzae</i> 86-028NP                                 |
| CP000083 | 61.99 | 66 | 7.15 | 61 | 3.3 | 64 | 7.11 | -356.6 | 198.3 | -322.1 | 174.1 | -371.8 | 113.7 | -353.2 | 178.2 | 0.69 | 0.04 | 0.7  | 0.1  | 0.69 | 0.05 | 0.69 | 0.04 | 4518 | 5373180 | <i>Collwellia psychroerythraea</i> 34H                                 |
| CP000411 | 62.11 | 68 | 7.7  | 61 | 4.3 | 67 | 7.93 | -367.4 | 213.8 | -324.5 | 183.6 | -385.1 | 123.5 | -363.5 | 191.9 | 0.74 | 0.03 | 0.76 | 0.1  | 0.74 | 0.04 | 0.74 | 0.03 | 1639 | 1780517 | <i>Oenococcus oeni</i> PSU-1                                           |
| CP001175 | 61.81 | 66 | 7.23 | 61 | 3.7 | 67 | 7.6  | -323.1 | 207.1 | -264.1 | 181.7 | -332.9 | 120.9 | -329.6 | 188.1 | 0.71 | 0.04 | 0.73 | 0.1  | 0.71 | 0.05 | 0.72 | 0.04 | 2919 | 2976212 | <i>Listeria monocytogenes</i> HCC23                                    |
| FM242711 | 61.94 | 66 | 7.11 | 61 | 3.6 | 67 | 7.39 | -314.2 | 202.8 | -268.7 | 182   | -332.4 | 117.2 | -335.4 | 191.2 | 0.71 | 0.04 | 0.73 | 0.1  | 0.71 | 0.04 | 0.71 | 0.04 | 2762 | 2912690 | <i>Listeria monocytogenes</i> Clip80459                                |
| CP000671 | 61.96 | 66 | 7.32 | 61 | 3.8 | 67 | 7.44 | -360   | 206.1 | -344.9 | 186.1 | -371.8 | 120.4 | -371.8 | 182.8 | 0.71 | 0.05 | 0.72 | 0.11 | 0.71 | 0.06 | 0.71 | 0.06 | 1571 | 1813033 | <i>Haemophilus influenzae</i> PittEE                                   |
| CP000672 | 61.99 | 66 | 7.37 | 61 | 3.9 | 67 | 7.27 | -349.7 | 283.5 | -331.7 | 368.9 | -357.8 | 134.5 | -353.4 | 181.9 | 0.71 | 0.05 | 0.71 | 0.11 | 0.71 | 0.06 | 0.71 | 0.05 | 1604 | 1887192 | <i>Haemophilus influenzae</i> PittGG                                   |
| AM260522 | 61.82 | 66 | 7.41 | 61 | 3.8 | 64 | 7.47 | -392.4 | 250   | -375.2 | 238.3 | -415.2 | 150.2 | -394.6 | 230.6 | 0.71 | 0.04 | 0.71 | 0.1  | 0.72 | 0.04 | 0.71 | 0.04 | 1552 | 1553927 | <i>Helicobacter acinonychis</i> str. Sheeba                            |
| AE017143 | 61.78 | 66 | 7.37 | 61 | 4.1 | 64 | 7.54 | -380.2 | 213.2 | -350.8 | 189.6 | -403.3 | 138.8 | -393.3 | 187.2 | 0.7  | 0.06 | 0.71 | 0.12 | 0.7  | 0.06 | 0.7  | 0.06 | 1591 | 1698955 | <i>Haemophilus ducreyi</i> 35000HP                                     |
| AE017262 | 61.96 | 66 | 7.22 | 61 | 3.7 | 67 | 7.43 | -314.6 | 202.6 | -272.9 | 181.8 | -333.5 | 119.9 | -338.2 | 189.8 | 0.71 | 0.04 | 0.73 | 0.1  | 0.71 | 0.04 | 0.71 | 0.04 | 2765 | 2905187 | <i>Listeria monocytogenes</i> str. 4b F2365                            |
| AL591824 | 62.02 | 66 | 7.13 | 61 | 3.6 | 67 | 7.37 | -314.9 | 201.1 | -270.1 | 180   | -332.7 | 117.3 | -334.6 | 186.8 | 0.71 | 0.04 | 0.73 | 0.11 | 0.71 | 0.04 | 0.71 | 0.04 | 2840 | 2944528 | <i>Listeria monocytogenes</i> EGD-e                                    |
| CP000812 | 61.30 | 64 | 6.71 | 61 | 2.6 | 62 | 6.85 | -335.7 | 197.8 | -327.1 | 216.7 | -351.8 | 106.2 | -335.4 | 196.1 | 0.73 | 0.03 | 0.73 | 0.09 | 0.73 | 0.03 | 0.73 | 0.03 | 2038 | 2135342 | <i>Thermotoga lettingae</i> TMO                                        |
| CP000414 | 62.29 | 66 | 7.37 | 61 | 3.4 | 64 | 7.3  | -360.4 | 207.1 | -314   | 175.6 | -379.6 | 126.9 | -349.8 | 182.8 | 0.68 | 0.04 | 0.71 | 0.1  | 0.68 | 0.04 | 0.68 | 0.04 | 1935 | 2038396 | <i>Leuconostoc mesenteroides</i> subsp. <i>mesenteroides</i> ATCC 8293 |
| CP001104 | 62.29 | 66 | 7.63 | 61 | 4   | 64 | 7.73 | -302   | 205.1 | -264.9 | 195.8 | -318.9 | 139.3 | -283.1 | 184.5 | 0.71 | 0.06 | 0.71 | 0.12 | 0.71 | 0.07 | 0.71 | 0.06 | 1965 | 2144190 | <i>Eubacterium eligens</i> ATCC 27750                                  |
| AE017226 | 62.13 | 68 | 8.99 | 61 | 5.7 | 67 | 9.12 | -355.4 | 217   | -332.2 | 209.5 | -377.7 | 116.7 | -348   | 190.4 | 0.77 | 0.04 | 0.8  | 0.08 | 0.76 | 0.04 | 0.77 | 0.04 | 2582 | 2843201 | <i>Trponema denticola</i> ATCC 35405                                   |
| CP000817 | 62.71 | 66 | 7.27 | 62 | 3.8 | 64 | 7.38 | -341.8 | 197   | -306.1 | 183.2 | -351.9 | 115.9 | -350.6 | 186.4 | 0.7  | 0.04 | 0.72 | 0.1  | 0.7  | 0.05 | 0.7  | 0.04 | 4349 | 4639821 | <i>Lysinibacillus sphaericus</i> C3-41                                 |
| CP001348 | 62.60 | 68 | 7.69 | 62 | 3.9 | 67 | 8    | -317.1 | 183.3 | -278.2 | 173.2 | -330.6 | 99.04 | -307.6 | 168.8 | 0.74 | 0.03 | 0.79 | 0.08 | 0.74 | 0.04 | 0.75 | 0.03 | 3348 | 4068724 | <i>Clostridium cellulolyticum</i> H10                                  |
| AL592022 | 62.56 | 66 | 7.22 | 62 | 3.5 | 67 | 7.45 | -310.9 | 199.1 | -266.9 | 184.1 | -325.4 | 113.4 | -329.4 | 187.9 | 0.71 | 0.04 | 0.72 | 0.11 | 0.71 | 0.05 | 0.71 | 0.04 | 2957 | 3011208 | <i>Listeria innocua</i> Clip11262                                      |
| CP000422 | 62.64 | 68 | 7.14 | 62 | 3.5 | 67 | 7.5  | -349.2 | 198.4 | -300.1 | 183.2 | -364.1 | 119   | -350.3 | 180.8 | 0.69 | 0.04 | 0.73 | 0.1  | 0.69 | 0.04 | 0.7  | 0.04 | 1722 | 1832387 | <i>Pediococcus pentosaceus</i> ATCC 25745                              |
| AE016830 | 62.47 | 66 | 7.3  | 62 | 4.5 | 67 | 7.62 | -342   | 212.8 | -282.3 | 189.5 | -353.1 | 124.1 | -345   | 198.3 | 0.71 | 0.05 | 0.73 | 0.11 | 0.71 | 0.06 | 0.71 | 0.06 | 3010 | 3218031 | <i>Enterococcus faecalis</i> V583                                      |
| CP000947 | 62.62 | 66 | 7.4  | 62 | 3.9 | 67 | 7.74 | -367.3 | 289.  |        |       |        |       |        |       |      |      |      |      |      |      |      |      |      |         |                                                                        |

|          |       |    |      |    |     |    |      |        |       |        |       |        |       |        |       |      |      |      |      |      |      |      |      |      |         |                                                              |
|----------|-------|----|------|----|-----|----|------|--------|-------|--------|-------|--------|-------|--------|-------|------|------|------|------|------|------|------|------|------|---------|--------------------------------------------------------------|
| AE005176 | 64.67 | 68 | 7.45 | 64 | 3.7 | 69 | 7.31 | -365.1 | 201.4 | -329.4 | 178.4 | -382.8 | 117.3 | -381.4 | 185.7 | 0.7  | 0.05 | 0.71 | 0.11 | 0.7  | 0.05 | 0.7  | 0.05 | 2257 | 2365589 | Lactococcus lactis subsp. lactis I1403                       |
| AE017334 | 64.62 | 68 | 6.97 | 64 | 3.7 | 67 | 7.16 | -310.4 | 210.3 | -271.1 | 190.7 | -315.1 | 132.8 | -346.4 | 207.3 | 0.7  | 0.05 | 0.7  | 0.11 | 0.7  | 0.05 | 0.7  | 0.05 | 4975 | 5227419 | Bacillus anthracis str. 'Ames Ancestor'                      |
| CP001177 | 64.41 | 68 | 6.99 | 64 | 3.7 | 67 | 7.19 | -312.3 | 208.9 | -273.4 | 194.1 | -316.7 | 133.6 | -348.1 | 207.1 | 0.7  | 0.05 | 0.71 | 0.11 | 0.7  | 0.05 | 0.7  | 0.05 | 5199 | 5269030 | Bacillus cereus AH187                                        |
| CP000903 | 64.44 | 68 | 7.07 | 64 | 3.7 | 67 | 7.25 | -311.2 | 208   | -270.5 | 192.9 | -313.7 | 132.3 | -346.1 | 206.7 | 0.7  | 0.05 | 0.71 | 0.11 | 0.7  | 0.05 | 0.7  | 0.05 | 5038 | 5262775 | Bacillus weihenstephanensis KBAB4                            |
| CP000553 | 65.02 | 64 | 8.62 | 64 | 4.6 | 67 | 8.06 | -353.3 | 205.9 | -364.3 | 186.2 | -366   | 128.3 | -361.5 | 185.9 | 0.7  | 0.04 | 0.69 | 0.12 | 0.7  | 0.05 | 0.7  | 0.05 | 2033 | 1864731 | Prochlorococcus marinus str. NATL1A                          |
| CP000095 | 64.88 | 64 | 8.49 | 64 | 4.6 | 67 | 7.97 | -351.3 | 203.5 | -361   | 186.5 | -360.8 | 128.7 | -359.4 | 190.6 | 0.7  | 0.04 | 0.69 | 0.12 | 0.7  | 0.05 | 0.7  | 0.05 | 2007 | 1842899 | Prochlorococcus marinus str. NATL2A                          |
| BA000028 | 64.32 | 68 | 6.93 | 64 | 3.4 | 67 | 7.06 | -314.4 | 189.7 | -277.8 | 176.3 | -322.9 | 107   | -313.5 | 173   | 0.7  | 0.04 | 0.72 | 0.11 | 0.7  | 0.04 | 0.7  | 0.04 | 3464 | 3630528 | Oceanobacillus iheyensis HTE831                              |
| AE009948 | 64.35 | 68 | 6.82 | 64 | 3.7 | 69 | 7.01 | -340.3 | 202   | -309.2 | 182.6 | -351.3 | 122   | -342.1 | 189.9 | 0.69 | 0.05 | 0.71 | 0.11 | 0.69 | 0.05 | 0.69 | 0.05 | 2042 | 2160267 | Streptococcus agalactiae 2603V/R                             |
| CP000227 | 64.44 | 68 | 7.18 | 64 | 3.7 | 67 | 7.32 | -311   | 209.7 | -275.6 | 193.5 | -314.5 | 127.5 | -351.1 | 209.3 | 0.7  | 0.05 | 0.71 | 0.11 | 0.7  | 0.05 | 0.7  | 0.05 | 5012 | 5214195 | Bacillus cereus Q1                                           |
| CP001215 | 64.62 | 68 | 6.94 | 64 | 3.7 | 67 | 7.18 | -286.4 | 196.1 | -247.5 | 178.2 | -285.8 | 121.1 | -315.4 | 196.8 | 0.7  | 0.05 | 0.71 | 0.11 | 0.7  | 0.05 | 0.7  | 0.05 | 5329 | 5230115 | Bacillus anthracis str. CDC 684                              |
| CP001407 | 64.56 | 68 | 6.9  | 64 | 3.7 | 67 | 7.3  | -312.8 | 208.1 | -276   | 188.7 | -315.9 | 127.4 | -349.4 | 208.4 | 0.7  | 0.05 | 0.71 | 0.11 | 0.7  | 0.05 | 0.7  | 0.05 | 5182 | 5269628 | Bacillus cereus 03BB102                                      |
| AE017194 | 64.42 | 68 | 7.12 | 64 | 3.9 | 67 | 7.37 | -312.9 | 208.5 | -280.3 | 195.8 | -318.4 | 133.7 | -350.3 | 209.7 | 0.7  | 0.05 | 0.7  | 0.11 | 0.7  | 0.05 | 0.7  | 0.05 | 5196 | 5224283 | Bacillus cereus ATCC 10987                                   |
| AE016879 | 64.62 | 68 | 6.97 | 64 | 3.7 | 67 | 7.18 | -310.4 | 210.3 | -271.7 | 190.8 | -314.9 | 133.2 | -345.4 | 206.9 | 0.7  | 0.05 | 0.7  | 0.11 | 0.7  | 0.05 | 0.7  | 0.05 | 5069 | 5227293 | Bacillus anthracis str. Ames                                 |
| CP000001 | 64.65 | 68 | 6.98 | 64 | 3.6 | 67 | 7.28 | -311.9 | 206.4 | -274.3 | 192.7 | -316.2 | 124.5 | -347   | 209   | 0.7  | 0.05 | 0.7  | 0.11 | 0.7  | 0.05 | 0.7  | 0.05 | 5131 | 5300915 | Bacillus cereus E33L                                         |
| AE017225 | 64.62 | 68 | 6.93 | 64 | 3.6 | 67 | 7.17 | -310.4 | 211.4 | -273.7 | 190.6 | -315.2 | 131.7 | -344.6 | 206.3 | 0.7  | 0.05 | 0.7  | 0.11 | 0.7  | 0.05 | 0.7  | 0.05 | 5276 | 5228663 | Bacillus anthracis str. Sterne                               |
| CP000485 | 64.57 | 68 | 7.07 | 64 | 3.5 | 67 | 7.19 | -313.1 | 208.3 | -282.7 | 196.7 | -318.1 | 127.1 | -349.4 | 207.3 | 0.7  | 0.04 | 0.69 | 0.12 | 0.7  | 0.05 | 0.7  | 0.05 | 4735 | 5257091 | Bacillus thuringiensis str. Al Hakam                         |
| CP000114 | 64.38 | 68 | 6.89 | 64 | 3.6 | 69 | 6.91 | -343.5 | 203.7 | -307.7 | 181.3 | -356.1 | 116.7 | -348.5 | 191.8 | 0.69 | 0.05 | 0.72 | 0.1  | 0.69 | 0.05 | 0.69 | 0.05 | 1962 | 2127839 | Streptococcus agalactiae A909                                |
| AL732656 | 64.37 | 68 | 6.68 | 64 | 3.7 | 69 | 7.21 | -342.2 | 203.6 | -305.5 | 183.5 | -353.6 | 116.3 | -345.6 | 194.9 | 0.69 | 0.05 | 0.72 | 0.1  | 0.69 | 0.05 | 0.69 | 0.05 | 2074 | 2211485 | Streptococcus agalactiae NEM316                              |
| AE017355 | 64.59 | 68 | 7.01 | 64 | 3.7 | 67 | 7.24 | -312.3 | 208.8 | -276.8 | 192.6 | -314.4 | 126.6 | -349   | 210.1 | 0.7  | 0.05 | 0.7  | 0.11 | 0.7  | 0.05 | 0.7  | 0.05 | 5116 | 5237682 | Bacillus thuringiensis serovar konkukian str. 97-27          |
| BX908798 | 65.28 | 66 | 7.42 | 64 | 3.6 | 67 | 7.62 | -367   | 207.5 | -337.4 | 193   | -378   | 116.7 | -378.5 | 189.4 | 0.68 | 0.05 | 0.68 | 0.11 | 0.68 | 0.05 | 0.68 | 0.05 | 2029 | 2414465 | Candidatus Protochlamydia amoebophila UWE25                  |
| CP000176 | 64.70 | 68 | 6.91 | 64 | 3.7 | 67 | 7.28 | -312.3 | 206.5 | -276.9 | 193.4 | -317.6 | 131.9 | -348.5 | 207   | 0.7  | 0.05 | 0.71 | 0.11 | 0.7  | 0.05 | 0.7  | 0.05 | 5193 | 5419036 | Bacillus cereus B4264                                        |
| AE016877 | 64.72 | 68 | 7.09 | 64 | 3.7 | 67 | 7.33 | -313.3 | 207   | -277.8 | 193   | -318.5 | 129.8 | -348.6 | 208.5 | 0.7  | 0.05 | 0.71 | 0.11 | 0.7  | 0.05 | 0.7  | 0.05 | 5152 | 5411809 | Bacillus cereus ATCC 14579                                   |
| CP001283 | 64.60 | 68 | 6.9  | 64 | 3.7 | 67 | 7.21 | -310.7 | 207.2 | -270.6 | 191.6 | -313.7 | 129.3 | -346.8 | 207.9 | 0.7  | 0.05 | 0.71 | 0.11 | 0.7  | 0.05 | 0.7  | 0.05 | 5235 | 5302683 | Bacillus cereus AH820                                        |
| CP001186 | 64.74 | 68 | 6.96 | 64 | 3.7 | 67 | 7.19 | -312.9 | 205.6 | -277.9 | 191.1 | -316.8 | 129.6 | -346.4 | 206   | 0.7  | 0.05 | 0.71 | 0.11 | 0.7  | 0.05 | 0.7  | 0.05 | 5234 | 5387334 | Bacillus cereus G942                                         |
| CP000679 | 64.75 | 68 | 7.19 | 64 | 3.8 | 67 | 7.18 | -354.6 | 211.8 | -337.2 | 214.1 | -375.4 | 119.2 | -362.9 | 212.1 | 0.73 | 0.03 | 0.75 | 0.09 | 0.73 | 0.04 | 0.73 | 0.04 | 2674 | 2970275 | Caldiocellulosruptor sacharolyticus DSM 8903                 |
| CP001393 | 64.83 | 68 | 7.47 | 64 | 4.2 | 67 | 7.39 | -339.1 | 249.5 | -307.8 | 206.5 | -358.9 | 122.4 | -343.5 | 213.2 | 0.73 | 0.04 | 0.75 | 0.09 | 0.73 | 0.04 | 0.74 | 0.04 | 2614 | 2919718 | Anaerocellum thermophilum DSM 6725                           |
| CP000413 | 64.74 | 68 | 7.23 | 64 | 3.3 | 69 | 7.36 | -341.9 | 201.8 | -314.5 | 195.6 | -358.7 | 119.8 | -339.6 | 182.5 | 0.69 | 0.05 | 0.7  | 0.12 | 0.69 | 0.05 | 0.69 | 0.05 | 1724 | 1894360 | Lactobacillus gasserii ATCC 33323                            |
| CP001391 | 64.84 | 68 | 7.31 | 64 | 3   | 67 | 7.16 | -303.3 | 189.7 | -284.2 | 173.2 | -309.5 | 102   | -304.6 | 172.5 | 0.73 | 0.03 | 0.76 | 0.1  | 0.73 | 0.04 | 0.73 | 0.03 | 1135 | 1445873 | Wolbachia sp. wRI                                            |
| CP000488 | 65.97 | 68 | 6.93 | 64 | 3.3 | 69 | 7.22 | -367.3 | 212.5 | -359.4 | 185.2 | -382.3 | 130.2 | -355.1 | 191.3 | 0.69 | 0.04 | 0.69 | 0.11 | 0.69 | 0.04 | 0.7  | 0.04 | 974  | 1160782 | Candidatus Ruthia magnifica str. Cm (Calyptogenia magnifica) |
| AM295250 | 65.37 | 68 | 7.14 | 64 | 3.3 | 69 | 7.18 | -317.6 | 215.1 | -275.1 | 160   | -327.5 | 101.5 | -311.4 | 164.4 | 0.7  | 0.05 | 0.69 | 0.12 | 0.7  | 0.05 | 0.7  | 0.05 | 2427 | 2566424 | Staphylococcus carnosus subsp. carnosus TM300                |
| AE017196 | 64.77 | 68 | 7.63 | 64 | 3.5 | 67 | 7.3  | -312.2 | 190.6 | -308.9 | 183   | -323.9 | 110.9 | -314.5 | 178.7 | 0.74 | 0.04 | 0.76 | 0.1  | 0.74 | 0.04 | 0.74 | 0.04 | 1116 | 1267782 | Wolbachia endosymbiont of Drosophila melanogaster            |
| CP000771 | 65.01 | 68 | 7.11 | 65 | 3.4 | 69 | 7.22 | -310.8 | 192.8 | -282.6 | 203.9 | -324.2 | 105.6 | -303.2 | 177   | 0.73 | 0.04 | 0.73 | 0.1  | 0.73 | 0.04 | 0.73 | 0.04 | 1748 | 1948941 | Fervidobacterium nodosum Rt17-B1                             |
| CP000033 | 65.29 | 68 | 7.39 | 65 | 3.7 | 69 | 7.37 | -355.3 | 202.6 | -326.4 | 190.7 | -367.1 | 123.3 | -350.3 | 179   | 0.69 | 0.05 | 0.7  | 0.12 | 0.69 | 0.05 | 0.69 | 0.05 | 1813 | 1993560 | Lactobacillus acidophilus NCFM                               |
| CP001130 | 65.15 | 68 | 7.26 | 65 | 3.6 | 69 | 7.08 | -361   | 208.9 | -352.3 | 206   | -377.4 | 120   | -354   | 191.2 | 0.71 | 0.03 | 0.71 | 0.1  | 0.71 | 0.04 | 0.71 | 0.04 | 1607 | 1559514 | Hydrogenobaculum sp. Y04AA51                                 |
| AE017198 | 65.39 | 68 | 7.02 | 65 | 3.3 | 69 | 7.27 | -346.1 | 200.5 | -314.4 | 191   | -359.6 | 116.2 | -344.9 | 189   | 0.69 | 0.04 | 0.72 | 0.12 | 0.69 | 0.05 | 0.7  | 0.05 | 1818 | 1992676 | Lactobacillus johnsonii NCC 533                              |
| AE017321 | 65.82 | 68 | 7.11 | 65 | 3.2 | 69 | 7.11 | -288.4 | 170.2 | -266.9 | 172   | -298.3 | 100.8 | -283.7 | 176.3 | 0.73 | 0.03 | 0.76 | 0.1  | 0.73 | 0.04 | 0.73 | 0.04 | 803  | 1080084 | Wolbachia endosymbiont strain TRS of Brugia malayi           |
| CP000153 | 65.54 | 71 | 7.25 | 65 | 3.5 | 69 | 7.11 | -346.2 | 202.6 | -325.1 | 186.2 | -363.7 | 107   | -348.8 | 190.2 | 0.75 | 0.04 | 0.77 | 0.11 | 0.76 | 0.04 | 0.76 | 0.04 | 2094 | 2201561 | Sulfurimonas denitrificans DSM 1251                          |
| CP000685 | 65.89 | 71 | 7.12 | 65 | 4.2 | 71 | 7.26 | -338.7 | 209.3 | -332   | 177.8 | -345.5 | 91.79 | -351.8 | 186.6 | 0.72 | 0.06 | 0.7  | 0.11 | 0.72 | 0.06 | 0.72 | 0.06 | 5007 | 6096872 | Flavobacterium johnsoniae UW101                              |
| CP000924 | 65.49 | 68 | 7.58 | 65 | 4.2 | 69 | 7.4  | -315.5 | 207.9 | -290.6 | 211.1 | -327.1 | 121.6 | -338.4 | 209.2 | 0.73 | 0.05 | 0.73 | 0.1  | 0.73 | 0.05 | 0.73 | 0.05 | 2223 | 2362816 | Thermoanaerobacter pseudethanolicus ATCC 33223               |
| AM999887 | 65.81 | 68 | 7.01 | 65 | 3.1 | 67 | 6.87 | -302.7 | 184.8 | -299.1 | 177.9 | -323.4 | 110   | -323.1 | 176.8 | 0.74 | 0.04 | 0.76 | 0.1  | 0.74 | 0.04 | 0.74 | 0.04 | 1267 | 1482455 | Wolbachia endosymbiont of Culex quinquefasciatus Pel         |
| CP000923 | 65.48 | 68 | 7.61 | 65 | 4.2 | 69 | 7.54 | -337.8 | 210.8 | -326.1 | 211.6 | -357   | 122.2 | -356.2 | 208.5 | 0.73 | 0.05 | 0.74 | 0.1  | 0.73 | 0.06 | 0.73 | 0.05 | 2331 | 2457259 | Thermoanaerobacter sp. X514                                  |
| CP000238 | 66.76 | 68 | 7.69 | 65 | 3.5 | 69 | 7.31 | -364.8 | 185.6 | -343.1 | 161   | -374.4 | 89.38 | -377   | 159.1 | 0.68 | 0.05 | 0.67 | 0.12 | 0.69 | 0.05 | 0.69 | 0.05 | 589  | 686194  | Baumannia cicadellinicola str. Hc (Homalodiscia coagulata)   |
| AP008934 | 66.76 | 71 | 6.91 | 66 | 3.4 | 71 | 7.03 | -327.8 | 185.7 | -294.3 | 170   | -335.2 | 108   | -318.1 | 162.5 | 0.69 | 0.05 | 0.71 | 0.12 | 0.69 | 0.05 | 0.69 | 0.05 | 2399 | 2516575 | Staphylococcus saprophyticus subsp. saprophyticus ATCC 15305 |
| CP000879 | 65.88 | 71 | 7.1  | 66 | 3.5 | 69 | 7.15 | -323.2 | 202.2 | -308.6 | 194.2 | -339.1 | 103   | -318.4 | 205.6 | 0.72 | 0.04 | 0.74 | 0.09 | 0.73 | 0.04 | 0.73 | 0.04 | 1891 | 2169548 | Petrogona mobilis SJ95                                       |
| CP001251 | 66.04 | 71 | 7.23 | 66 | 3.2 | 69 | 6.99 | -342.8 | 233.1 | -333.7 | 239.3 | -361   | 139.4 | -358.3 | 229.7 | 0.72 | 0.03 | 0.74 | 0.11 | 0.72 | 0.03 | 0.72 | 0.03 | 1733 | 1855560 | Dictyoglomus turgidum DSM 6724                               |
| CP001147 | 65.87 | 71 | 7.41 | 66 | 3.8 | 69 | 7.14 | -336.4 | 197.7 | -328.7 | 191.4 | -351.7 | 109.1 | -325.6 | 191.9 | 0.71 | 0.05 | 0.71 | 0.11 | 0.71 | 0.05 | 0.71 | 0.05 | 1999 | 2003803 | Thermodesulfobaculum yellowstonii DSM 11347                  |
| CP000487 | 66.69 | 68 | 7.74 | 66 | 3.8 | 71 | 7.67 | -321.2 | 193.6 | -315   | 189.2 | -328.9 | 112.8 | -325.4 | 189.7 | 0.72 | 0.04 | 0.73 | 0.1  | 0.72 | 0.04 | 0.72 | 0.04 | 1686 | 1773615 | Campylobacter fetus subsp. fetus 82-40                       |
| AP010656 | 67.34 | 68 | 6.92 | 66 | 3   | 71 | 6.9  |        |       |        |       |        |       |        |       |      |      |      |      |      |      |      |      |      |         |                                                              |

|          |       |    |      |    |     |    |      |        |       |        |       |        |       |        |       |      |      |      |      |      |      |      |      |      |         |                                                         |
|----------|-------|----|------|----|-----|----|------|--------|-------|--------|-------|--------|-------|--------|-------|------|------|------|------|------|------|------|------|------|---------|---------------------------------------------------------|
| CP000937 | 67.43 | 73 | 6.94 | 67 | 3.4 | 71 | 6.79 | -341.3 | 201   | -327.6 | 185.6 | -351.5 | 124.4 | -339.7 | 186.5 | 0.72 | 0.04 | 0.77 | 0.11 | 0.72 | 0.04 | 0.73 | 0.04 | 1904 | 2045775 | Francisella philomiragia subsp. philomiragia ATCC 25017 |
| AJ749949 | 67.74 | 71 | 6.83 | 67 | 3.6 | 71 | 7.14 | -348.4 | 198.7 | -341.8 | 178.9 | -363.9 | 121.8 | -353.8 | 177.4 | 0.72 | 0.04 | 0.75 | 0.11 | 0.72 | 0.04 | 0.72 | 0.04 | 1590 | 1892819 | Francisella tularensis subsp. tularensis SCHU S4        |
| AM286280 | 67.74 | 71 | 6.82 | 67 | 3.6 | 71 | 7.14 | -348.3 | 198.5 | -342   | 179   | -363.9 | 122   | -354.2 | 177.2 | 0.72 | 0.04 | 0.75 | 0.11 | 0.72 | 0.04 | 0.72 | 0.04 | 1592 | 1892616 | Francisella tularensis subsp. tularensis FSC198         |
| CP000029 | 67.85 | 71 | 6.87 | 67 | 3.5 | 71 | 6.91 | -328.9 | 217.7 | -288   | 166.2 | -333.4 | 101.1 | -315.6 | 163.8 | 0.7  | 0.05 | 0.72 | 0.12 | 0.7  | 0.05 | 0.7  | 0.05 | 2331 | 2616530 | Staphylococcus epidermidis RP62A                        |
| CP000608 | 67.73 | 71 | 6.82 | 67 | 3.6 | 71 | 7    | -341.5 | 195.6 | -322.3 | 182.9 | -354.9 | 118.9 | -341   | 174.4 | 0.72 | 0.04 | 0.75 | 0.11 | 0.72 | 0.04 | 0.72 | 0.04 | 1601 | 1898476 | Francisella tularensis subsp. tularensis WY96-3418      |
| AP009247 | 68.41 | 71 | 6.81 | 67 | 3.3 | 71 | 7.05 | -360.1 | 214.8 | -345.8 | 187.7 | -375   | 140.9 | -362.9 | 195.7 | 0.69 | 0.04 | 0.69 | 0.11 | 0.69 | 0.04 | 0.69 | 0.04 | 933  | 1022154 | Candidatus Vesicomosocius okutanii HA                   |
| CP000437 | 67.84 | 71 | 6.9  | 67 | 3.7 | 71 | 7.06 | -353.3 | 196.6 | -343.9 | 181.8 | -366.1 | 119.8 | -353.1 | 182.6 | 0.71 | 0.04 | 0.75 | 0.11 | 0.72 | 0.04 | 0.72 | 0.04 | 1518 | 1895727 | Francisella tularensis subsp. holarctica OSU18          |
| CP001227 | 67.44 | 73 | 7.83 | 67 | 4   | 71 | 8.01 | -316.3 | 179.6 | -308.3 | 155.2 | -328.6 | 92.97 | -311.4 | 161.3 | 0.72 | 0.04 | 0.75 | 0.11 | 0.72 | 0.05 | 0.72 | 0.04 | 924  | 1288492 | Rickettsia peacockii str. Rustic                        |
| CP000803 | 67.84 | 71 | 6.9  | 67 | 3.6 | 71 | 7    | -353.6 | 196.5 | -344.7 | 182.3 | -366.9 | 116.8 | -354.2 | 181.9 | 0.72 | 0.04 | 0.75 | 0.11 | 0.72 | 0.04 | 0.72 | 0.04 | 1546 | 1890909 | Francisella tularensis subsp. holarctica FTNF002-00     |
| AM233362 | 67.85 | 71 | 6.81 | 67 | 3.6 | 71 | 7.08 | -353   | 196.4 | -345.1 | 182   | -365.8 | 117.7 | -351.5 | 180.4 | 0.72 | 0.04 | 0.75 | 0.11 | 0.72 | 0.04 | 0.72 | 0.04 | 1743 | 1895994 | Francisella tularensis subsp. holarctica LVS            |
| CP001229 | 67.25 | 71 | 6.97 | 67 | 3.8 | 71 | 6.74 | -332.6 | 207.1 | -322.6 | 200.8 | -347.8 | 115.4 | -323.5 | 196.9 | 0.73 | 0.04 | 0.72 | 0.11 | 0.73 | 0.05 | 0.73 | 0.04 | 1701 | 1640877 | Sulfurihydrogenibium azorense Az-Fu1                    |
| AP008971 | 67.69 | 73 | 7.06 | 67 | 3.9 | 71 | 6.84 | -315.2 | 192.4 | -283.8 | 182.6 | -324.3 | 117.5 | -314.3 | 180.1 | 0.74 | 0.06 | 0.78 | 0.11 | 0.74 | 0.06 | 0.74 | 0.06 | 1623 | 1797577 | Finegoldia magna ATCC 29328                             |
| CP000683 | 67.46 | 73 | 8.68 | 67 | 3.9 | 71 | 8.11 | -329.8 | 183.2 | -347.3 | 171.7 | -341.1 | 97.68 | -328.5 | 169   | 0.72 | 0.04 | 0.74 | 0.13 | 0.72 | 0.05 | 0.72 | 0.04 | 963  | 1360898 | Rickettsia massiliae MTU5                               |
| CP001612 | 67.60 | 71 | 7.94 | 68 | 4.2 | 71 | 8.03 | -328.1 | 183.9 | -325.9 | 165.3 | -333.7 | 102.6 | -327.9 | 167.4 | 0.72 | 0.04 | 0.74 | 0.12 | 0.72 | 0.05 | 0.72 | 0.05 | 1012 | 1278540 | Rickettsia africana ESF-5                               |
| CP000848 | 67.53 | 71 | 8.03 | 68 | 4.9 | 71 | 7.96 | -328.4 | 182.8 | -324.2 | 171.4 | -337.1 | 118   | -327.8 | 164.8 | 0.72 | 0.05 | 0.74 | 0.11 | 0.72 | 0.06 | 0.72 | 0.06 | 1219 | 1257710 | Rickettsia rickettsii str. 'Sheila Smith'               |
| CP000673 | 67.98 | 71 | 8.1  | 67 | 5.4 | 71 | 8.44 | -309.4 | 193.4 | -275.8 | 184.7 | -311.9 | 115.6 | -312.7 | 183.7 | 0.73 | 0.08 | 0.75 | 0.12 | 0.73 | 0.08 | 0.73 | 0.08 | 3815 | 3964618 | Clostridium kluyveri DSM 555                            |
| AE015450 | 68.55 | 75 | 7.36 | 68 | 3.4 | 71 | 6.84 | -392.2 | 209.9 | -363   | 182.4 | -410.2 | 95.54 | -386.9 | 182.9 | 0.68 | 0.04 | 0.67 | 0.12 | 0.68 | 0.05 | 0.68 | 0.04 | 725  | 996422  | Mycoplasma gallisepticum R                              |
| CP000016 | 70.44 | 71 | 8.03 | 68 | 3.3 | 73 | 7.72 | -357.2 | 208.6 | -353.3 | 183.9 | -352.9 | 120.4 | -359.9 | 180.8 | 0.7  | 0.03 | 0.7  | 0.12 | 0.7  | 0.04 | 0.7  | 0.04 | 607  | 791654  | Candidatus Blochmannia pennsylvanicus str. BPEN         |
| AP009049 | 68.01 | 71 | 7.79 | 68 | 5.2 | 71 | 8.28 | -310.6 | 193.7 | -281.9 | 193   | -313.4 | 111.5 | -313.7 | 183.8 | 0.73 | 0.07 | 0.74 | 0.12 | 0.73 | 0.08 | 0.73 | 0.07 | 3466 | 3896121 | Clostridium kluyveri NBRC 12016                         |
| AE006914 | 67.56 | 71 | 8.21 | 68 | 4.6 | 71 | 8.01 | -328.5 | 183.2 | -327   | 168.2 | -328.7 | 111.2 | -320.5 | 170.4 | 0.72 | 0.05 | 0.73 | 0.12 | 0.72 | 0.06 | 0.72 | 0.06 | 1372 | 1268755 | Rickettsia conorii str. Malish 7                        |
| CP000766 | 67.55 | 71 | 8.29 | 68 | 4.8 | 71 | 7.99 | -328   | 182.6 | -324.6 | 169.9 | -335.9 | 115.8 | -329.2 | 163.1 | 0.71 | 0.05 | 0.74 | 0.12 | 0.72 | 0.06 | 0.72 | 0.06 | 1232 | 1268175 | Rickettsia rickettsii str. Iowa                         |
| CP000896 | 68.07 | 71 | 6.77 | 68 | 3   | 71 | 6.82 | -350.3 | 185.1 | -300   | 162.2 | -360.4 | 90.56 | -336   | 164   | 0.68 | 0.05 | 0.71 | 0.12 | 0.69 | 0.05 | 0.69 | 0.05 | 1367 | 1496992 | Acholeplasma laidlawii PG-8A                            |
| CP000053 | 67.55 | 71 | 8.17 | 68 | 4.1 | 71 | 8.11 | -326.6 | 183.4 | -327.6 | 162.7 | -332.4 | 98.1  | -316.6 | 157.7 | 0.72 | 0.05 | 0.73 | 0.12 | 0.72 | 0.05 | 0.72 | 0.05 | 1385 | 1485148 | Rickettsia felis URRWXCal2                              |
| CP000847 | 67.67 | 71 | 7.91 | 68 | 4.4 | 69 | 7.98 | -329.2 | 182.2 | -332.2 | 169.9 | -337.9 | 110.3 | -323.9 | 166.6 | 0.72 | 0.05 | 0.75 | 0.11 | 0.72 | 0.06 | 0.72 | 0.05 | 1131 | 1231060 | Rickettsia akari str. Hartford                          |
| CP000576 | 68.66 | 71 | 8.33 | 68 | 4.5 | 71 | 7.88 | -358   | 195.5 | -370.9 | 183.3 | -366   | 110.8 | -378.2 | 179.8 | 0.71 | 0.04 | 0.71 | 0.12 | 0.71 | 0.05 | 0.71 | 0.04 | 1808 | 1641879 | Prochlorococcus marinus str. MIT 9301                   |
| CP000111 | 68.79 | 71 | 8.4  | 68 | 4.6 | 73 | 7.92 | -358.3 | 196.5 | -375.6 | 185.5 | -367.8 | 115.2 | -378   | 185   | 0.71 | 0.04 | 0.71 | 0.12 | 0.71 | 0.05 | 0.71 | 0.04 | 1851 | 1709204 | Prochlorococcus marinus str. MIT 9312                   |
| CP001080 | 67.97 | 71 | 7.11 | 68 | 3.7 | 71 | 7.09 | -312.9 | 194.1 | -291.9 | 176.7 | -324   | 123.7 | -297.3 | 184.1 | 0.71 | 0.04 | 0.72 | 0.11 | 0.71 | 0.04 | 0.71 | 0.04 | 1709 | 1838442 | Sulfurihydrogenibium sp. YO3AOP1                        |
| CP000551 | 68.68 | 71 | 8.44 | 68 | 4.5 | 73 | 7.99 | -358.2 | 194.9 | -372.3 | 180.8 | -371   | 109.8 | -378.5 | 185.1 | 0.7  | 0.04 | 0.71 | 0.12 | 0.71 | 0.05 | 0.71 | 0.05 | 1814 | 1669886 | Prochlorococcus marinus str. AS9601                     |
| CP001047 | 69.29 | 71 | 6.65 | 68 | 3.6 | 73 | 6.55 | -343.7 | 188.2 | -320.6 | 168.7 | -374   | 95.84 | -345.7 | 179.5 | 0.7  | 0.04 | 0.71 | 0.11 | 0.7  | 0.04 | 0.7  | 0.04 | 622  | 820453  | Mycoplasma arthritis 158L3-1                            |
| CP000825 | 68.85 | 71 | 8.34 | 68 | 4.6 | 71 | 7.91 | -357.7 | 196.9 | -368.4 | 181.6 | -364.5 | 113.5 | -383.4 | 191.2 | 0.71 | 0.04 | 0.71 | 0.12 | 0.71 | 0.05 | 0.71 | 0.05 | 1887 | 1738790 | Prochlorococcus marinus str. MIT 9215                   |
| CP000087 | 68.35 | 73 | 7.85 | 68 | 4.2 | 71 | 8.2  | -324.1 | 183.8 | -320.1 | 160.5 | -333.9 | 96.92 | -318   | 168   | 0.72 | 0.05 | 0.74 | 0.12 | 0.72 | 0.06 | 0.72 | 0.06 | 1420 | 1522076 | Rickettsia bellii RML369-C                              |
| CP000849 | 68.37 | 73 | 7.87 | 68 | 4.4 | 71 | 8.16 | -331.5 | 184.1 | -332.6 | 167.7 | -337.9 | 102.1 | -330.4 | 172   | 0.72 | 0.05 | 0.75 | 0.12 | 0.72 | 0.06 | 0.72 | 0.06 | 1419 | 1528980 | Rickettsia bellii OSU 85-389                            |
| AE001437 | 69.07 | 73 | 7    | 68 | 3.5 | 73 | 6.89 | -305   | 192.9 | -283.8 | 194.9 | -312.6 | 119   | -323.8 | 191.4 | 0.74 | 0.05 | 0.75 | 0.12 | 0.74 | 0.05 | 0.74 | 0.05 | 3651 | 3940880 | Clostridium acetobutylicum ATCC 824                     |
| CP000409 | 68.95 | 73 | 7.72 | 68 | 4.3 | 71 | 7.61 | -331.2 | 179.8 | -326   | 159   | -340.1 | 107.2 | -323.4 | 170.9 | 0.71 | 0.05 | 0.74 | 0.12 | 0.71 | 0.05 | 0.71 | 0.05 | 964  | 1159772 | Rickettsia canadensis str. McKiel                       |
| L43967   | 68.31 | 71 | 6.16 | 69 | 3.9 | 71 | 6.72 | -397.5 | 210.9 | -366.9 | 184.6 | -419.8 | 102.7 | -382.2 | 185.2 | 0.68 | 0.05 | 0.67 | 0.12 | 0.68 | 0.05 | 0.68 | 0.05 | 473  | 580076  | Mycoplasma genitalium G37                               |
| BX548174 | 69.20 | 71 | 8.38 | 68 | 4.5 | 73 | 7.8  | -356.2 | 193.2 | -368.3 | 179.3 | -361.1 | 109.7 | -381.4 | 180   | 0.71 | 0.04 | 0.71 | 0.13 | 0.71 | 0.05 | 0.71 | 0.05 | 1840 | 1657990 | Prochlorococcus marinus subsp. pastoris str. CCMP1986   |
| CP000552 | 69.21 | 71 | 8.58 | 68 | 4.6 | 73 | 7.88 | -353.3 | 194.5 | -371.7 | 183.2 | -364.1 | 109.1 | -378.9 | 184.3 | 0.71 | 0.04 | 0.72 | 0.12 | 0.71 | 0.05 | 0.71 | 0.05 | 1827 | 1704176 | Prochlorococcus marinus str. MIT 9515                   |
| CP000236 | 69.90 | 71 | 6.95 | 69 | 3.5 | 71 | 7.11 | -338.8 | 239.5 | -356.6 | 221.4 | -357.4 | 175   | -365.3 | 226.2 | 0.72 | 0.05 | 0.73 | 0.12 | 0.72 | 0.06 | 0.72 | 0.05 | 941  | 1176248 | Ehrlichia chaffeensis str. Arkansas                     |
| AP008981 | 69.49 | 71 | 6.82 | 69 | 3.5 | 71 | 7.29 | -326.6 | 182   | -326.8 | 179.5 | -337.3 | 113.2 | -325.6 | 170.6 | 0.72 | 0.05 | 0.71 | 0.11 | 0.73 | 0.06 | 0.72 | 0.06 | 1898 | 2008987 | Orientia tsutsugamushi str. Ikeda                       |
| CP000716 | 68.60 | 71 | 7.56 | 69 | 3.7 | 71 | 7.04 | -323.4 | 220.6 | -299.6 | 237.9 | -335.3 | 142.7 | -321.9 | 231.9 | 0.72 | 0.04 | 0.73 | 0.11 | 0.72 | 0.04 | 0.72 | 0.04 | 1866 | 1915238 | Thermosiphon melanesiensis BI429                        |
| CP000538 | 69.38 | 73 | 7.49 | 69 | 3.9 | 73 | 7.19 | -369.6 | 223.1 | -359.3 | 216   | -385.2 | 138.7 | -396.2 | 220   | 0.72 | 0.04 | 0.74 | 0.12 | 0.72 | 0.05 | 0.72 | 0.04 | 1617 | 1616554 | Campylobacter jejuni subsp. jejuni 81-176               |
| CP000107 | 71.04 | 71 | 6.76 | 69 | 3.1 | 73 | 6.93 | -328   | 239.5 | -315.7 | 229.8 | -323.7 | 166.9 | -337.8 | 216.5 | 0.73 | 0.04 | 0.73 | 0.12 | 0.73 | 0.05 | 0.73 | 0.05 | 922  | 1315030 | Ehrlichia canis str. Jake                               |
| AM494475 | 69.47 | 71 | 6.56 | 69 | 3.2 | 71 | 6.62 | -319.8 | 182.9 | -324.9 | 182.1 | -342.2 | 113.9 | -342.9 | 167.3 | 0.72 | 0.05 | 0.72 | 0.12 | 0.72 | 0.05 | 0.72 | 0.05 | 1167 | 2127051 | Orientia tsutsugamushi str. Boryong                     |
| CP000721 | 70.14 | 73 | 6.82 | 69 | 3.5 | 73 | 6.91 | -306.9 | 189   | -268.2 | 179.9 | -309.1 | 108.1 | -301.8 | 173   | 0.73 | 0.05 | 0.76 | 0.12 | 0.72 | 0.05 | 0.73 | 0.05 | 5010 | 6000632 | Clostridium beijerinckii NCIMB 8052                     |
| AL111168 | 69.45 | 73 | 7.45 | 69 | 3.8 | 73 | 7.26 | -369.3 | 223.6 | -360.8 | 218.1 | -385.6 | 136.4 | -389   | 216.8 | 0.72 | 0.04 | 0.75 | 0.12 | 0.72 | 0.04 | 0.72 | 0.04 | 1603 | 1641481 | Campylobacter jejuni subsp. jejuni NCTC 11168           |
| CP001685 | 70.35 | 75 | 7.56 | 69 | 4.5 | 73 | 7.53 | -290.6 | 203   | -243   | 193   | -297.5 | 125.5 | -276.2 | 202.9 | 0.72 | 0.05 | 0.77 | 0.11 | 0.71 | 0.06 | 0.72 | 0.05 | 2199 | 2465610 | Leptotrichia buccalis DSM 1135                          |
| CP000814 | 69.46 | 73 | 7.51 | 69 | 3.8 | 73 | 7.18 | -368.1 | 223.8 | -357   | 218.4 | -385   | 136.2 | -401.7 | 220.5 | 0.72 | 0.04 | 0.74 | 0.12 | 0.72 | 0.04 | 0.72 | 0.04 | 1606 | 1628115 | Campylobacter jejuni subsp. jejuni 81116                |
| CP001185 |       |    |      |    |     |    |      |        |       |        |       |        |       |        |       |      |      |      |      |      |      |      |      |      |         |                                                         |

|          |       |    |      |    |     |    |      |        |       |        |       |        |       |        |       |      |      |      |      |      |      |      |      |      |         |                                                                 |
|----------|-------|----|------|----|-----|----|------|--------|-------|--------|-------|--------|-------|--------|-------|------|------|------|------|------|------|------|------|------|---------|-----------------------------------------------------------------|
| CP000728 | 71.69 | 75 | 7.32 | 71 | 4.1 | 76 | 7.43 | -315.9 | 198.6 | -274   | 191.5 | -310.5 | 117.2 | -316.6 | 181.5 | 0.73 | 0.06 | 0.74 | 0.13 | 0.73 | 0.06 | 0.73 | 0.06 | 3509 | 3995387 | Clostridium botulinum F str. Langeland                          |
| CP000726 | 71.79 | 75 | 7.31 | 71 | 4.1 | 76 | 7.53 | -315.7 | 198.2 | -273.7 | 190.2 | -311.3 | 117.7 | -320.2 | 182.3 | 0.73 | 0.06 | 0.73 | 0.13 | 0.73 | 0.06 | 0.73 | 0.06 | 3421 | 3863450 | Clostridium botulinum A str. ATCC 19397                         |
| CP000939 | 71.66 | 73 | 7.36 | 71 | 4.2 | 76 | 7.44 | -318.3 | 198.8 | -279   | 190.1 | -312.1 | 117.7 | -321   | 181.5 | 0.73 | 0.06 | 0.74 | 0.13 | 0.73 | 0.07 | 0.73 | 0.06 | 3519 | 3958233 | Clostridium botulinum B1 str. Okra                              |
| CP001581 | 71.79 | 73 | 7.56 | 71 | 4.4 | 76 | 7.65 | -315   | 198.3 | -275.9 | 191.9 | -307.4 | 117.6 | -316.4 | 181.9 | 0.73 | 0.07 | 0.74 | 0.13 | 0.73 | 0.07 | 0.73 | 0.07 | 3737 | 4155278 | Clostridium botulinum A2 str. Kyoto                             |
| AE015927 | 71.25 | 73 | 7.38 | 71 | 3.8 | 76 | 7.09 | -300.4 | 189.6 | -281.1 | 195.1 | -307.5 | 100.9 | -320   | 185.2 | 0.73 | 0.05 | 0.7  | 0.13 | 0.73 | 0.05 | 0.73 | 0.05 | 2373 | 2799251 | Clostridium tetani E88                                          |
| AP006628 | 72.24 | 75 | 8.65 | 71 | 4.7 | 76 | 7.77 | -384.1 | 246.3 | -379.9 | 220.4 | -384.9 | 163.8 | -371.9 | 258   | 0.7  | 0.06 | 0.71 | 0.13 | 0.7  | 0.06 | 0.7  | 0.06 | 746  | 853092  | Onion yellows phytoplasma OY-M                                  |
| CP001083 | 71.78 | 75 | 7.41 | 71 | 4.2 | 76 | 7.53 | -316.9 | 197.9 | -283.4 | 190.2 | -312.7 | 118.1 | -318.2 | 182.9 | 0.73 | 0.06 | 0.73 | 0.13 | 0.73 | 0.07 | 0.73 | 0.06 | 3633 | 3977794 | Clostridium botulinum Ba4 str. 657                              |
| BX248583 | 72.62 | 75 | 7.41 | 71 | 3.4 | 76 | 7.25 | -401.3 | 264.3 | -419.8 | 259.8 | -415.7 | 169.7 | -466.1 | 252.9 | 0.73 | 0.05 | 0.73 | 0.13 | 0.73 | 0.05 | 0.73 | 0.05 | 581  | 705557  | Candidatus Blochmannia floridanus                               |
| CP001205 | 71.46 | 75 | 7.89 | 71 | 3.9 | 76 | 7.27 | -357.2 | 239.2 | -350.5 | 247.5 | -353.8 | 164.2 | -365.3 | 250.9 | 0.71 | 0.04 | 0.73 | 0.11 | 0.71 | 0.04 | 0.71 | 0.04 | 794  | 906707  | Borrelia burgdorferi ZS7                                        |
| AE000783 | 71.41 | 75 | 7.76 | 71 | 3.9 | 76 | 7.34 | -356.6 | 239.1 | -349.6 | 250.1 | -355.7 | 163.8 | -365.3 | 248.4 | 0.71 | 0.04 | 0.72 | 0.11 | 0.71 | 0.04 | 0.71 | 0.04 | 821  | 910724  | Borrelia burgdorferi B31                                        |
| AM422018 | 72.58 | 75 | 8.51 | 71 | 4.5 | 78 | 7.73 | -411.2 | 261.6 | -393.5 | 244.3 | -420   | 168.8 | -419.5 | 253.2 | 0.7  | 0.06 | 0.72 | 0.13 | 0.7  | 0.07 | 0.7  | 0.06 | 679  | 879959  | Candidatus Phytoplasma australiense                             |
| FM864216 | 71.46 | 75 | 6.89 | 71 | 4.1 | 76 | 7.35 | -387.9 | 258.1 | -375.4 | 173.8 | -401.9 | 154.6 | -400   | 238.1 | 0.7  | 0.04 | 0.73 | 0.11 | 0.7  | 0.05 | 0.7  | 0.04 | 663  | 846214  | Mycoplasma conjunctivae                                         |
| CP001357 | 72.94 | 77 | 8.35 | 71 | 4.5 | 76 | 7.41 | -329.7 | 200.2 | -337.4 | 179.8 | -328.5 | 117.4 | -356.1 | 177.3 | 0.73 | 0.05 | 0.74 | 0.13 | 0.73 | 0.05 | 0.73 | 0.05 | 2566 | 3000694 | Brachyspira hyodysenteriae WA1                                  |
| CP001056 | 72.49 | 75 | 7.09 | 72 | 3.8 | 76 | 7.06 | -318.6 | 195.9 | -281.9 | 188.8 | -316.6 | 117.2 | -324   | 186.7 | 0.74 | 0.05 | 0.75 | 0.13 | 0.74 | 0.05 | 0.74 | 0.05 | 3380 | 3800327 | Clostridium botulinum B str. Eklund 17B                         |
| CP001078 | 72.64 | 75 | 7.1  | 72 | 3.7 | 76 | 6.99 | -322.5 | 196.3 | -284.5 | 186.5 | -318.9 | 116.4 | -330.7 | 185.4 | 0.74 | 0.05 | 0.75 | 0.13 | 0.74 | 0.05 | 0.75 | 0.05 | 3175 | 3659644 | Clostridium botulinum E3 str. Alaska E43                        |
| CP000061 | 73.11 | 75 | 8.48 | 72 | 5.3 | 76 | 7.44 | -408.4 | 243.7 | -408.1 | 213.7 | -420.1 | 164.8 | -422.7 | 242.8 | 0.7  | 0.06 | 0.71 | 0.13 | 0.71 | 0.07 | 0.7  | 0.06 | 669  | 706569  | Aster yellows witches'-broom phytoplasma AYWB                   |
| CP000976 | 72.41 | 75 | 7.61 | 72 | 3.8 | 76 | 7.07 | -341.4 | 252.1 | -328   | 247.6 | -327.2 | 195.8 | -336.5 | 252.4 | 0.73 | 0.04 | 0.71 | 0.12 | 0.73 | 0.05 | 0.73 | 0.05 | 819  | 931674  | Borrelia duttonii Ly                                            |
| CP001158 | 73.71 | 75 | 8.56 | 72 | 3.8 | 78 | 7.89 | -379.1 | 212.1 | -384.8 | 186.3 | -376.4 | 97.13 | -416.7 | 187   | 0.72 | 0.04 | 0.74 | 0.13 | 0.72 | 0.04 | 0.72 | 0.04 | 551  | 641895  | Buchnera aphidicola str. Tuc7 (Acyrtosiphon pisum)              |
| CP000993 | 72.48 | 75 | 7.74 | 72 | 3.8 | 76 | 7.22 | -338.5 | 251.5 | -326.1 | 246.6 | -329.9 | 195.9 | -336.5 | 251.9 | 0.73 | 0.04 | 0.71 | 0.12 | 0.73 | 0.05 | 0.73 | 0.05 | 799  | 930981  | Borrelia recurrentis A1                                         |
| CP001161 | 73.71 | 75 | 8.57 | 72 | 3.8 | 78 | 7.91 | -379.6 | 212   | -385.9 | 186.1 | -375.8 | 97.38 | -417.1 | 188.3 | 0.72 | 0.04 | 0.74 | 0.13 | 0.72 | 0.04 | 0.72 | 0.04 | 553  | 642122  | Buchnera aphidicola str. 5A (Acyrtosiphon pisum)                |
| BA000003 | 73.69 | 75 | 8.6  | 72 | 3.9 | 78 | 7.97 | -379.1 | 211.6 | -385.6 | 186.1 | -375.2 | 97.74 | -417.3 | 190.4 | 0.72 | 0.04 | 0.74 | 0.13 | 0.72 | 0.04 | 0.72 | 0.04 | 562  | 640681  | Buchnera aphidicola str. APS (Acyrtosiphon pisum)               |
| AL445566 | 73.36 | 75 | 6.84 | 73 | 4.2 | 76 | 6.75 | -405.5 | 215.2 | -381.7 | 194.4 | -424   | 109.9 | -406.3 | 203.8 | 0.71 | 0.04 | 0.7  | 0.13 | 0.71 | 0.05 | 0.71 | 0.05 | 774  | 963879  | Mycoplasma pulmonis UAB CTIP                                    |
| AE009951 | 72.85 | 75 | 7.22 | 73 | 4   | 78 | 7.14 | -322.9 | 198   | -287.8 | 209.5 | -335.1 | 123.1 | -309.1 | 192.2 | 0.76 | 0.05 | 0.76 | 0.15 | 0.76 | 0.06 | 0.76 | 0.06 | 2043 | 2174500 | Fusobacterium nucleatum subsp. nucleatum ATCC 25586             |
| CP000361 | 72.95 | 75 | 6.95 | 73 | 3.6 | 76 | 6.52 | -361   | 197.3 | -354.9 | 188.1 | -376.3 | 112   | -398.1 | 196.9 | 0.76 | 0.05 | 0.73 | 0.14 | 0.76 | 0.05 | 0.76 | 0.05 | 2247 | 2341251 | Arcobacter butzleri RM4018                                      |
| AE017263 | 72.98 | 75 | 6.91 | 73 | 4   | 78 | 7.01 | -351   | 180.9 | -305.5 | 162.5 | -364.9 | 87.95 | -359.7 | 181.4 | 0.73 | 0.05 | 0.75 | 0.14 | 0.73 | 0.06 | 0.73 | 0.05 | 678  | 793224  | Mesoplasma florum L1                                            |
| AE016826 | 74.66 | 75 | 7.92 | 73 | 3.5 | 78 | 7.47 | -376.6 | 224.1 | -356.8 | 204.9 | -374.1 | 140.9 | -380.5 | 213.2 | 0.72 | 0.04 | 0.74 | 0.13 | 0.72 | 0.04 | 0.72 | 0.04 | 502  | 615980  | Buchnera aphidicola str. Bp (Baizongia pistaciae)               |
| CP001184 | 74.23 | 77 | 7.01 | 74 | 4   | 78 | 7.25 | -410.5 | 197.4 | -380.3 | 177.6 | -415.8 | 114.6 | -396.6 | 182.3 | 0.71 | 0.06 | 0.7  | 0.15 | 0.72 | 0.06 | 0.72 | 0.06 | 640  | 874478  | Ureaplasma urealyticum serovar 10 str. ATCC 33699               |
| BA000026 | 74.28 | 77 | 6.29 | 74 | 3.7 | 78 | 6.83 | -395.8 | 193.1 | -368.4 | 175.9 | -405   | 101   | -405.9 | 182.4 | 0.74 | 0.06 | 0.73 | 0.14 | 0.75 | 0.06 | 0.75 | 0.06 | 1036 | 1358633 | Mycoplasma penetrans HF-2                                       |
| AE013218 | 74.67 | 75 | 8.29 | 73 | 4.1 | 78 | 8    | -392.9 | 223.3 | -394.2 | 192   | -385.1 | 106.6 | -454.7 | 208.3 | 0.73 | 0.04 | 0.74 | 0.14 | 0.74 | 0.04 | 0.74 | 0.04 | 543  | 641454  | Buchnera aphidicola str. Sg (Schizaphis graminum)               |
| CP000942 | 74.50 | 77 | 7.1  | 74 | 4.1 | 78 | 7.3  | -404.6 | 192.8 | -364.2 | 180   | -411.3 | 96.24 | -402.3 | 179.8 | 0.71 | 0.05 | 0.71 | 0.14 | 0.71 | 0.05 | 0.71 | 0.05 | 604  | 751679  | Ureaplasma parvum serovar 3 str. ATCC 27815                     |
| AF222894 | 74.50 | 75 | 7.11 | 74 | 4.1 | 78 | 7.3  | -404.7 | 192.6 | -364.8 | 180.6 | -410.5 | 96.65 | -401   | 179.5 | 0.71 | 0.05 | 0.7  | 0.14 | 0.71 | 0.05 | 0.71 | 0.05 | 607  | 751719  | Ureaplasma parvum serovar 3 str. ATCC 700970                    |
| AE017308 | 75.05 | 77 | 6.55 | 75 | 3.8 | 78 | 6.6  | -404.8 | 203.6 | -357   | 190.2 | -420.8 | 105.9 | -412.9 | 198.2 | 0.72 | 0.05 | 0.71 | 0.14 | 0.73 | 0.05 | 0.73 | 0.05 | 631  | 777079  | Mycoplasma mobile 163K                                          |
| BX293980 | 76.03 | 77 | 6.7  | 76 | 3.9 | 78 | 6.95 | -381.1 | 205.5 | -359.4 | 197.1 | -396.9 | 108   | -395.2 | 194.7 | 0.75 | 0.07 | 0.7  | 0.16 | 0.76 | 0.07 | 0.76 | 0.07 | 998  | 1211703 | Mycoplasma mycoides subsp. mycoides SC str. PG1                 |
| CP000123 | 76.23 | 77 | 6.32 | 76 | 4.2 | 80 | 6.95 | -390.6 | 206.7 | -362.1 | 181.7 | -408   | 108   | -389.4 | 194.3 | 0.75 | 0.06 | 0.72 | 0.15 | 0.76 | 0.06 | 0.76 | 0.06 | 804  | 1010023 | Mycoplasma capricolum subsp. capricolum ATCC 27343              |
| BA000021 | 77.52 | 80 | 8.67 | 76 | 4.3 | 82 | 8.01 | -404.4 | 238.2 | -430.4 | 206.8 | -395.8 | 105   | -462.3 | 221.4 | 0.75 | 0.05 | 0.77 | 0.15 | 0.75 | 0.05 | 0.75 | 0.05 | 607  | 697724  | Wigglesworthia glossinidia endosymbiont of Glossina brevipalpis |
| CU469464 | 78.61 | 80 | 8.21 | 77 | 4.2 | 82 | 7.68 | -458.8 | 239   | -435.6 | 234.8 | -451.1 | 121.6 | -501.7 | 230.5 | 0.73 | 0.06 | 0.73 | 0.15 | 0.74 | 0.06 | 0.74 | 0.06 | 478  | 601943  | Candidatus Phytoplasma mali                                     |
| CP001605 | 77.40 | 80 | 8.37 | 78 | 4.8 | 82 | 8.32 | -464   | 298.3 | -456.3 | 286.6 | -500.5 | 164.6 | -497.5 | 282.8 | 0.76 | 0.05 | 0.76 | 0.16 | 0.75 | 0.06 | 0.76 | 0.05 | 241  | 276984  | Candidatus Sulcia muelleri SMDSEM                               |
| CP000770 | 77.56 | 80 | 8.62 | 78 | 4.9 | 84 | 8.05 | -446   | 284.4 | -464.5 | 246   | -460.5 | 130.8 | -491.1 | 244.6 | 0.77 | 0.04 | 0.8  | 0.15 | 0.78 | 0.05 | 0.78 | 0.05 | 224  | 245530  | Candidatus Sulcia muelleri GWSS                                 |
| CP000263 | 79.90 | 80 | 8.26 | 78 | 4.8 | 84 | 8.64 | -445.4 | 275.1 | -427.1 | 242.8 | -437.9 | 134.3 | -502.5 | 260.5 | 0.78 | 0.05 | 0.79 | 0.14 | 0.79 | 0.05 | 0.79 | 0.05 | 355  | 416380  | Buchnera aphidicola str. Cc (Cinara cedri)                      |
| AP009180 | 83.44 | 86 | 7.18 | 86 | 5.2 | 87 | 6.19 | -558.3 | 326.4 | -590.1 | 322   | -630.8 | 195.2 | -595.9 | 276.6 | 0.79 | 0.04 | 0.82 | 0.13 | 0.79 | 0.05 | 0.79 | 0.05 | 177  | 159662  | Candidatus Carsonella ruddii PV                                 |
