# Supplementary material
Source: PubMed Central journal article supplement (PMC2963087)
Supplement: NIHMS236872-supplement-03.pdf [file NIHMS236872-supplement-03.pdf]

| Allele name | N-term comp. | C-term comp. | N-term struct. | Middle struct. | C-term struct. | CAI  | Expression score | Calculated score | Accession |
|-------------|--------------|--------------|----------------|----------------|----------------|------|------------------|------------------|-----------|
| lmTIM.wt    | 34.29        | 42.86        | -119.62        | -180.20        | -73.74         | 0.71 | 0                | 0                | GU735679  |
| lmTIM.1a    | 34.29        | 48.57        | -119.31        | -211.58        | -24.74         | 0.99 | 2                | 1                | GU735680  |
| lmTIM.1b    | 34.29        | 48.57        | -120.54        | -202.79        | -23.58         | 0.99 | 2                | 1                | GU735681  |
| lmTIM.1c    | 34.29        | 42.86        | -116.51        | -203.18        | -18.98         | 0.99 | 2                | 1                | GU735682  |
| lmTIM.2a    | 57.14        | 48.57        | -61.69         | -114.49        | -123.59        | 0.57 | 3                | 3                | GU735683  |
| lmTIM.2b    | 57.14        | 48.57        | -60.42         | -107.04        | -123.59        | 0.57 | 3                | 3                | GU735684  |
| lmTIM.2c    | 57.14        | 45.71        | -60.10         | -101.78        | -113.92        | 0.58 | 3                | 3                | GU735685  |
| lmTIM.3a    | 57.14        | 45.71        | -133.18        | -205.70        | -21.28         | 0.95 | 2                | 3                | GU735686  |
| lmTIM.3b    | 57.14        | 51.43        | -133.94        | -207.01        | -24.22         | 0.95 | 2                | 3                | GU735687  |
| lmTIM.3c    | 57.14        | 42.86        | -134.51        | -200.11        | -18.23         | 0.95 | 2                | 3                | GU735688  |
| lmTIM.4a    | 45.71        | 45.71        | -14.48         | -22.49         | -34.23         | 0.55 | 2                | 2                | GU735689  |
| lmTIM.4b    | 45.71        | 45.71        | -14.48         | -19.46         | -34.23         | 0.56 | 2                | 2                | GU735690  |
| lmTIM.4c    | 45.71        | 45.71        | -14.48         | -23.33         | -33.71         | 0.56 | 2                | 2                | GU735691  |
| lmTIM.5a    | 31.43        | 48.57        | -18.47         | -72.51         | -79.09         | 0.83 | 1                | 1                | GU735692  |
| lmTIM.5b    | 31.43        | 42.86        | -18.47         | -66.14         | -70.82         | 0.82 | 1                | 1                | GU735693  |
| lmTIM.5c    | 31.43        | 48.57        | -18.47         | -59.45         | -78.47         | 0.82 | 1                | 1                | GU735694  |
| lmTIM.6a    | 57.14        | 57.14        | -16.04         | -21.55         | -32.71         | 0.56 | 3                | 3                | GU735695  |
| lmTIM.6b    | 57.14        | 54.29        | -16.04         | -22.13         | -34.99         | 0.57 | 3                | 3                | GU735696  |
| lmTIM.6c    | 57.14        | 54.29        | -16.04         | -23.36         | -34.75         | 0.55 | 3                | 3                | GU735697  |
| lmTIM.7a    | 57.14        | 48.57        | -19.84         | -50.71         | -88.13         | 0.79 | 3                | 3                | GU735698  |
| lmTIM.7b    | 57.14        | 48.57        | -19.84         | -53.70         | -73.60         | 0.79 | 3                | 3                | GU735699  |
| lmTIM.7c    | 57.14        | 42.86        | -19.84         | -67.78         | -76.27         | 0.78 | 3                | 3                | GU735700  |
| lmTIM.8a    | 57.14        | 51.43        | -18.14         | -10.81         | -40.63         | 0.65 | 3                | 3                | GU735701  |
| lmTIM.8b    | 57.14        | 51.43        | -18.14         | -8.47          | -47.45         | 0.65 | 3                | 3                | GU735702  |
| lmTIM.8c    | 57.14        | 51.43        | -22.62         | -11.00         | -39.55         | 0.65 | 3                | 3                | GU735703  |
| lmTIM.9a    | 45.71        | 51.43        | -19.87         | -8.23          | -30.79         | 0.63 | 3                | 2                | GU735704  |
| lmTIM.9b    | 45.71        | 51.43        | -19.87         | -8.25          | -34.10         | 0.63 | 3                | 2                | GU735705  |
| lmTIM.9c    | 45.71        | 51.43        | -22.94         | -7.86          | -41.07         | 0.66 | 3                | 2                | GU735706  |
| lmTIM.10a   | 45.71        | 51.43        | -19.87         | -9.95          | -60.30         | 0.64 | 3                | 2                | GU735707  |
| lmTIM.10b   | 45.71        | 51.43        | -22.94         | -9.07          | -35.17         | 0.63 | 3                | 2                | GU735708  |
| lmTIM.10c   | 45.71        | 48.57        | -19.87         | -11.15         | -102.63        | 0.64 | 3                | 2                | GU735709  |
| lmTIM.11a   | 42.86        | 65.71        | -13.73         | -15.71         | -32.86         | 0.65 | 3                | 3                | GU735710  |
| lmTIM.11b   | 45.71        | 65.71        | -22.94         | -9.45          | -53.60         | 0.66 | 3                | 3                | GU735711  |
| lmTIM.11c   | 45.71        | 65.71        | -19.21         | -9.68          | -54.01         | 0.66 | 3                | 3                | GU735712  |
| lmTIM.12a   | 45.71        | 51.43        | -143.28        | -187.88        | -49.88         | 0.68 | 0                | 0                | GU735713  |
| lmTIM.12b   | 45.71        | 51.43        | -143.28        | -205.49        | -50.40         | 0.69 | 0                | 0                | GU735714  |
| lmTIM.12c   | 45.71        | 51.43        | -143.28        | -202.77        | -50.22         | 0.68 | 0                | 0                | GU735715  |
| lmTIM.13a   | 57.14        | 51.43        | -18.14         | -157.59        | -50.40         | 0.68 | 3                | 3                | GU735716  |
| lmTIM.13b   | 57.14        | 51.43        | -18.14         | -160.97        | -52.30         | 0.68 | 3                | 3                | GU735717  |
| lmTIM.13c   | 57.14        | 51.43        | -18.14         | -164.16        | -52.30         | 0.68 | 3                | 3                | GU735718  |
| lmTIM.14a   | 57.14        | 51.43        | -18.14         | -193.41        | -48.55         | 0.66 | 3                | 3                | GU735719  |
| lmTIM.14b   | 57.14        | 48.57        | -22.62         | -199.61        | -48.55         | 0.66 | 3                | 3                | GU735720  |
| lmTIM.14c   | 57.14        | 51.43        | -18.14         | -196.19        | -57.46         | 0.65 | 3                | 3                | GU735721  |
| lmTIM.15a   | 54.29        | 40.00        | -14.14         | -225.02        | -686.83        | 0.69 | 1                | 1                | GU735722  |
| lmTIM.15b   | 54.29        | 40.00        | -14.14         | -231.31        | -686.83        | 0.68 | 1                | 1                | GU735723  |

|           |       |       |         |         |         |      |   |   |          |
|-----------|-------|-------|---------|---------|---------|------|---|---|----------|
| lmTIM.15c | 54.29 | 40.00 | -14.14  | -232.61 | -686.83 | 0.68 | 1 | 1 | GU735724 |
| lmTIM.16a | 51.43 | 54.29 | -83.93  | -313.72 | -518.18 | 0.91 | 3 | 2 | GU735725 |
| lmTIM.16b | 51.43 | 54.29 | -84.58  | -282.89 | -518.18 | 0.90 | 3 | 2 | GU735726 |
| lmTIM.17a | 57.14 | 54.29 | -87.17  | -313.74 | -518.18 | 0.90 | 3 | 3 | GU735727 |
| lmTIM.17b | 57.14 | 54.29 | -89.79  | -281.35 | -518.18 | 0.90 | 3 | 3 | GU735728 |
| lmTIM.18a | 57.14 | 54.29 | -117.54 | -284.18 | -518.18 | 0.89 | 3 | 3 | GU735729 |
| lmTIM.18b | 57.14 | 54.29 | -119.11 | -315.00 | -518.18 | 0.89 | 3 | 3 | GU735730 |
| lmTIM.19a | 57.14 | 54.29 | -103.97 | -315.51 | -518.18 | 0.88 | 3 | 3 | GU735731 |
| lmTIM.19b | 57.14 | 54.29 | -90.55  | -315.56 | -518.18 | 0.88 | 3 | 3 | GU735732 |
| lmTIM.20a | 57.14 | 54.29 | -102.57 | -302.03 | -518.18 | 0.88 | 3 | 3 | GU735733 |
| lmTIM.20b | 57.14 | 54.29 | -96.25  | -283.21 | -518.18 | 0.88 | 3 | 3 | GU735734 |
| lmTIM.21a | 57.14 | 54.29 | -72.67  | -280.84 | -518.18 | 0.88 | 3 | 3 | GU735735 |
| lmTIM.21b | 57.14 | 54.29 | -91.15  | -281.53 | -518.18 | 0.88 | 3 | 3 | GU735736 |
| lmTIM.22a | 51.43 | 54.29 | -83.93  | -313.72 | -518.18 | 0.91 | 3 | 2 | GU735737 |
| lmTIM.22b | 51.43 | 54.29 | -84.58  | -282.89 | -518.18 | 0.90 | 3 | 2 | GU735738 |
| lmTIM.23a | 57.14 | 54.29 | -94.72  | -282.41 | -518.18 | 0.90 | 3 | 3 | GU735739 |
| lmTIM.23b | 57.14 | 54.29 | -88.00  | -312.82 | -518.18 | 0.90 | 3 | 3 | GU735740 |
| lmTIM.24a | 57.14 | 54.29 | -110.72 | -283.62 | -518.18 | 0.89 | 3 | 3 | GU735741 |
| lmTIM.24b | 57.14 | 54.29 | -105.38 | -314.22 | -518.18 | 0.90 | 3 | 3 | GU735742 |
| lmTIM.25a | 57.14 | 54.29 | -173.76 | -288.64 | -518.18 | 0.87 | 1 | 2 | GU735743 |
| lmTIM.25b | 57.14 | 54.29 | -155.48 | -295.13 | -518.18 | 0.88 | 1 | 2 | GU735744 |
| lmTIM.26a | 57.14 | 54.29 | -124.66 | -305.40 | -518.18 | 0.87 | 1 | 2 | GU735745 |
| lmTIM.26b | 57.14 | 54.29 | -114.59 | -285.38 | -518.18 | 0.87 | 1 | 2 | GU735746 |
| lmTIM.27a | 57.14 | 54.29 | -161.07 | -298.40 | -518.18 | 0.87 | 1 | 2 | GU735747 |
| lmTIM.27b | 57.14 | 54.29 | -162.95 | -300.56 | -518.18 | 0.87 | 1 | 2 | GU735748 |
| lmTIM.28  | 45.71 | 54.29 | -81.31  | -290.96 | -518.18 | 0.91 | 2 | 1 | GU735749 |
| lmTIM.29a | 57.14 | 37.14 | -46.86  | -208.11 | -40.89  | 0.84 | 3 | 3 | GU735750 |
| lmTIM.29b | 54.29 | 37.14 | -46.86  | -163.61 | -58.47  | 0.84 | 3 | 1 | GU735751 |
| lmTIM.29c | 57.14 | 37.14 | -48.64  | -162.00 | -42.00  | 0.83 | 3 | 3 | GU735752 |
| lmTIM.30a | 57.14 | 34.29 | -46.86  | -8.36   | -32.07  | 0.77 | 3 | 3 | GU735753 |
| lmTIM.30b | 57.14 | 34.29 | -46.86  | -8.95   | -33.78  | 0.76 | 3 | 3 | GU735754 |
| lmTIM.30c | 57.14 | 40.00 | -46.86  | -8.01   | -35.33  | 0.76 | 3 | 3 | GU735755 |
| lmTIM.31a | 40.00 | 42.86 | -43.05  | -200.46 | -38.93  | 0.83 | 1 | 0 | GU735756 |
| lmTIM.31b | 40.00 | 42.86 | -43.05  | -204.33 | -38.93  | 0.84 | 1 | 0 | GU735757 |
| lmTIM.31c | 40.00 | 42.86 | -43.05  | -159.17 | -57.41  | 0.83 | 0 | 0 | GU735758 |
| lmTIM.32a | 40.00 | 40.00 | -54.35  | -13.43  | -35.11  | 0.76 | 0 | 1 | GU735759 |
| lmTIM.32b | 40.00 | 40.00 | -51.45  | -13.50  | -35.11  | 0.76 | 1 | 1 | GU735760 |
| lmTIM.32c | 40.00 | 40.00 | -51.40  | -14.25  | -31.33  | 0.76 | 0 | 1 | GU735761 |
| lmTIM.33a | 40.00 | 54.29 | -51.83  | -109.35 | -122.97 | 0.71 | 0 | 1 | GU735762 |
| lmTIM.33b | 40.00 | 54.29 | -89.35  | -109.25 | -122.97 | 0.72 | 0 | 0 | GU735763 |
| lmTIM.34a | 54.29 | 54.29 | -45.81  | -107.96 | -122.97 | 0.71 | 3 | 2 | GU735764 |
| lmTIM.34b | 48.57 | 54.29 | -63.79  | -107.25 | -122.97 | 0.71 | 1 | 1 | GU735765 |
| lmTIM.35a | 54.29 | 54.29 | -49.17  | -109.45 | -122.97 | 0.71 | 3 | 2 | GU735766 |
| lmTIM.35b | 48.57 | 54.29 | -59.17  | -106.75 | -122.97 | 0.70 | 1 | 1 | GU735767 |
| lmTIM.36a | 60.00 | 54.29 | -71.23  | -106.83 | -122.97 | 0.70 | 3 | 3 | GU735768 |
| lmTIM.36b | 57.14 | 54.29 | -73.76  | -110.59 | -122.97 | 0.70 | 3 | 3 | GU735769 |

|           |       |       |         |         |         |      |   |   |          |
|-----------|-------|-------|---------|---------|---------|------|---|---|----------|
| lmTIM.37a | 60.00 | 54.29 | -69.41  | -109.47 | -122.97 | 0.70 | 3 | 3 | GU735770 |
| lmTIM.37b | 60.00 | 54.29 | -69.41  | -125.70 | -110.31 | 0.70 | 3 | 3 | GU735771 |
| lmTIM.38a | 60.00 | 22.86 | -69.41  | -105.07 | -107.75 | 0.69 | 3 | 3 | GU735772 |
| lmTIM.38b | 60.00 | 22.86 | -69.41  | -104.65 | -103.70 | 0.69 | 3 | 3 | GU735773 |
| lmTIM.39a | 60.00 | 28.57 | -69.41  | -108.18 | -129.83 | 0.69 | 3 | 3 | GU735774 |
| lmTIM.39b | 60.00 | 28.57 | -69.41  | -98.52  | -95.26  | 0.68 | 3 | 3 | GU735775 |
| lmTIM.40a | 60.00 | 40.00 | -69.41  | -90.66  | -16.54  | 0.70 | 3 | 3 | GU735776 |
| lmTIM.40b | 60.00 | 40.00 | -69.41  | -90.86  | -20.05  | 0.69 | 3 | 3 | GU735777 |
| lmTIM.41a | 60.00 | 40.00 | -69.41  | -90.59  | -15.96  | 0.69 | 3 | 3 | GU735778 |
| lmTIM.41b | 60.00 | 40.00 | -69.41  | -90.59  | -17.82  | 0.69 | 3 | 3 | GU735779 |
| lmTIM.42a | 45.71 | 54.29 | -323.91 | -127.87 | -122.97 | 0.70 | 0 | 0 | GU735780 |
| lmTIM.42b | 48.57 | 54.29 | -280.35 | -126.04 | -122.97 | 0.70 | 1 | 1 | GU735781 |
| lmTIM.43a | 60.00 | 54.29 | -130.39 | -113.54 | -122.97 | 0.70 | 3 | 3 | GU735782 |
| lmTIM.43b | 60.00 | 54.29 | -94.46  | -112.18 | -122.97 | 0.70 | 3 | 3 | GU735783 |
| lmTIM.44a | 60.00 | 54.29 | -80.01  | -108.09 | -122.97 | 0.70 | 3 | 3 | GU735784 |
| lmTIM.44b | 60.00 | 54.29 | -84.06  | -108.11 | -122.97 | 0.70 | 3 | 3 | GU735785 |
| lmTIM.45a | 60.00 | 57.14 | -69.41  | -127.88 | -605.05 | 0.70 | 3 | 3 | GU735786 |
| lmTIM.45b | 60.00 | 57.14 | -69.41  | -118.71 | -444.73 | 0.70 | 3 | 3 | GU735787 |
| lmTIM.46a | 60.00 | 54.29 | -69.41  | -101.71 | -214.64 | 0.70 | 3 | 3 | GU735788 |
| lmTIM.46b | 60.00 | 54.29 | -69.41  | -109.80 | -244.86 | 0.70 | 3 | 3 | GU735789 |
| lmTIM.47a | 60.00 | 45.71 | -69.41  | -93.70  | -35.28  | 0.71 | 3 | 3 | GU735790 |
| lmTIM.47b | 60.00 | 45.71 | -69.41  | -103.47 | -97.66  | 0.71 | 3 | 3 | GU735791 |
| lmTIM.48a | 40.00 | 22.86 | -50.50  | -199.35 | -60.63  | 0.68 | 0 | 0 | GU735792 |
| lmTIM.48b | 40.00 | 22.86 | -51.45  | -191.16 | -142.25 | 0.72 | 1 | 0 | GU735793 |
| lmTIM.49a | 54.29 | 45.71 | -54.51  | -174.20 | -57.22  | 0.80 | 1 | 1 | GU735794 |
| lmTIM.49b | 54.29 | 42.86 | -54.25  | -152.92 | -38.83  | 0.80 | 1 | 1 | GU735795 |
| lmTIM.49c | 48.57 | 45.71 | -43.71  | -178.11 | -60.27  | 0.79 | 3 | 1 | GU735796 |
| lmTIM.50a | 60.00 | 54.29 | -71.66  | -190.99 | -77.44  | 0.67 | 2 | 3 | GU735797 |
| lmTIM.50b | 60.00 | 54.29 | -71.66  | -199.49 | -77.44  | 0.67 | 2 | 3 | GU735798 |

| Allele name | N-term comp. | C-term comp. | N-term struct. | Middle struct. | C-term struct. | CAI  | Expression score | Calculated score | Accession |
|-------------|--------------|--------------|----------------|----------------|----------------|------|------------------|------------------|-----------|
| ggFABP.wt   | 45.71        | 48.57        | -51.00         | -152.26        | -146.44        | 0.57 | 3                | 1                | GU735799  |
| ggFABP.1a   | 37.14        | 45.71        | -92.35         | -85.26         | -79.85         | 0.98 | 1                | 1                | GU735800  |
| ggFABP.1b   | 34.29        | 51.43        | -81.87         | -88.73         | -70.76         | 0.98 | 0                | 1                | GU735801  |
| ggFABP.2a   | 60.00        | 54.29        | -95.39         | -76.39         | -323.44        | 0.61 | 3                | 3                | GU735802  |
| ggFABP.2b   | 60.00        | 54.29        | -95.39         | -124.35        | -322.99        | 0.63 | 3                | 3                | GU735803  |
| ggFABP.2c   | 60.00        | 54.29        | -95.39         | -117.64        | -267.70        | 0.65 | 3                | 3                | GU735804  |
| ggFABP.3a   | 60.00        | 48.57        | -177.76        | -100.06        | -74.01         | 0.93 | 3                | 3                | GU735805  |
| ggFABP.3b   | 60.00        | 48.57        | -178.37        | -93.66         | -73.47         | 0.92 | 3                | 3                | GU735806  |
| ggFABP.4a   | 48.57        | 48.57        | -22.34         | 0.00           | -27.51         | 0.56 | 3                | 2                | GU735807  |
| ggFABP.4b   | 48.57        | 48.57        | -22.34         | 0.00           | -27.51         | 0.58 | 3                | 2                | GU735808  |
| ggFABP.4c   | 51.43        | 48.57        | -23.31         | 0.00           | -27.51         | 0.55 | 3                | 2                | GU735809  |
| ggFABP.5a   | 34.29        | 51.43        | -32.19         | -61.50         | -22.19         | 0.90 | 1                | 1                | GU735810  |
| ggFABP.5b   | 34.29        | 48.57        | -32.19         | -74.52         | -23.66         | 0.90 | 1                | 1                | GU735811  |
| ggFABP.5c   | 34.29        | 48.57        | -32.19         | -54.67         | -20.71         | 0.89 | 1                | 1                | GU735812  |
| ggFABP.6a   | 57.14        | 45.71        | -33.80         | -10.85         | -29.45         | 0.55 | 3                | 3                | GU735813  |
| ggFABP.6b   | 57.14        | 45.71        | -33.80         | -5.52          | -29.45         | 0.55 | 3                | 3                | GU735814  |
| ggFABP.6c   | 57.14        | 45.71        | -33.80         | -5.22          | -29.45         | 0.57 | 3                | 3                | GU735815  |
| ggFABP.7a   | 57.14        | 51.43        | -33.80         | -69.69         | -20.84         | 0.84 | 3                | 3                | GU735816  |
| ggFABP.7b   | 57.14        | 45.71        | -33.80         | -54.45         | -22.34         | 0.84 | 3                | 3                | GU735817  |
| ggFABP.8a   | 37.14        | 54.29        | -100.70        | -93.05         | -74.31         | 0.99 | 1                | 1                | GU735818  |
| ggFABP.8b   | 34.29        | 42.86        | -90.03         | -87.89         | -75.62         | 0.97 | 0                | 1                | GU735819  |
| ggFABP.8c   | 37.14        | 51.43        | -105.03        | -86.89         | -74.91         | 0.98 | 1                | 1                | GU735820  |
| ggFABP.9a   | 60.00        | 40.00        | -140.54        | -120.91        | -210.70        | 0.68 | 3                | 3                | GU735821  |
| ggFABP.9b   | 60.00        | 45.71        | -205.92        | -126.21        | -201.55        | 0.65 | 3                | 3                | GU735822  |
| ggFABP.9c   | 60.00        | 45.71        | -205.29        | -133.69        | -196.63        | 0.66 | 3                | 3                | GU735823  |
| ggFABP.10a  | 60.00        | 51.43        | -214.08        | -114.58        | -173.70        | 0.86 | 2                | 3                | GU735824  |
| ggFABP.10b  | 60.00        | 45.71        | -236.73        | -74.80         | -78.22         | 0.87 | 2                | 3                | GU735825  |
| ggFABP.10c  | 60.00        | 45.71        | -236.63        | -119.35        | -77.84         | 0.87 | 3                | 3                | GU735826  |
| ggFABP.11a  | 45.71        | 42.86        | -23.43         | -16.24         | -21.90         | 0.65 | 3                | 2                | GU735827  |
| ggFABP.11b  | 48.57        | 42.86        | -22.32         | -12.14         | -21.90         | 0.67 | 2                | 2                | GU735828  |
| ggFABP.12a  | 37.14        | 48.57        | -21.28         | -9.71          | -41.40         | 0.86 | 1                | 1                | GU735829  |
| ggFABP.12b  | 40.00        | 45.71        | -21.28         | -31.76         | -50.33         | 0.87 | 1                | 1                | GU735830  |
| ggFABP.12c  | 40.00        | 45.71        | -21.22         | -41.03         | -53.58         | 0.86 | 1                | 1                | GU735831  |
| ggFABP.13a  | 60.00        | 48.57        | -122.60        | -50.55         | -22.72         | 0.67 | 3                | 3                | GU735832  |
| ggFABP.13b  | 60.00        | 40.00        | -127.15        | -60.65         | -67.35         | 0.66 | 3                | 3                | GU735833  |
| ggFABP.13c  | 60.00        | 57.14        | -126.92        | -63.50         | -36.60         | 0.65 | 3                | 3                | GU735834  |
| ggFABP.14a  | 60.00        | 40.00        | -49.81         | -58.78         | -42.15         | 0.80 | 3                | 3                | GU735835  |
| ggFABP.14b  | 60.00        | 54.29        | -57.87         | -79.60         | -59.75         | 0.78 | 3                | 3                | GU735836  |
| ggFABP.14c  | 60.00        | 42.86        | -49.81         | -60.50         | -38.66         | 0.78 | 2                | 3                | GU735837  |

| Allele name | N-term comp. | C-term comp. | N-term struct. | Middle struct. | C-term struct. | CAI  | Expression score | Calculated score | Accession |
|-------------|--------------|--------------|----------------|----------------|----------------|------|------------------|------------------|-----------|
| ttAST.wt    | 37.14        | 25.71        | -85.29         | -467.78        | -311.02        | 0.57 | 0                | 0                | GU735838  |
| ttAST.1a    | 65.71        | 51.43        | -111.25        | -115.46        | -73.38         | 0.48 | 2                | 2                | GU735839  |
| ttAST.1b    | 65.71        | 51.43        | -62.77         | -111.53        | -93.15         | 0.48 | 2                | 2                | GU735840  |
| ttAST.1c    | 65.71        | 51.43        | -80.96         | -113.49        | -93.15         | 0.48 | 2                | 2                | GU735841  |
| ttAST.2a    | 28.57        | 54.29        | -143.83        | -306.18        | -48.25         | 0.98 | 0                | 1                | GU735842  |
| ttAST.2b    | 28.57        | 51.43        | -244.07        | -321.92        | -52.09         | 0.98 | 0                | 1                | GU735843  |
| ttAST.2c    | 31.43        | 48.57        | -239.87        | -316.87        | -68.87         | 0.98 | 0                | 1                | GU735844  |
| ttAST.3a    | 65.71        | 51.43        | -186.71        | -316.06        | -404.84        | 0.89 | 3                | 3                | GU735845  |
| ttAST.3b    | 65.71        | 51.43        | -152.02        | -312.70        | -404.84        | 0.89 | 3                | 3                | GU735846  |
| ttAST.4a    | 37.14        | 42.86        | -23.69         | -24.87         | -54.75         | 0.51 | 0                | 0                | GU735847  |
| ttAST.4b    | 34.29        | 40.00        | -23.69         | -22.58         | -27.99         | 0.50 | 0                | 0                | GU735848  |
| ttAST.4c    | 31.43        | 40.00        | -23.69         | -23.96         | -27.99         | 0.49 | 0                | 0                | GU735849  |
| ttAST.5a    | 37.14        | 45.71        | -22.59         | -17.26         | -39.57         | 0.82 | 1                | 1                | GU735850  |
| ttAST.5b    | 37.14        | 51.43        | -22.59         | -17.56         | -38.39         | 0.82 | 1                | 1                | GU735851  |
| ttAST.5c    | 37.14        | 45.71        | -22.59         | -18.23         | -35.46         | 0.81 | 1                | 1                | GU735852  |
| ttAST.6a    | 62.86        | 51.43        | -36.27         | -19.25         | -35.33         | 0.49 | 2                | 2                | GU735853  |
| ttAST.6b    | 62.86        | 51.43        | -36.27         | -17.27         | -35.33         | 0.48 | 2                | 2                | GU735854  |
| ttAST.6c    | 62.86        | 51.43        | -36.27         | -20.25         | -35.33         | 0.48 | 2                | 2                | GU735855  |
| ttAST.7a    | 62.86        | 48.57        | -36.27         | -7.37          | -27.07         | 0.73 | 3                | 3                | GU735856  |
| ttAST.7b    | 62.86        | 48.57        | -36.27         | -9.40          | -27.07         | 0.73 | 3                | 3                | GU735857  |
| ttAST.7c    | 62.86        | 48.57        | -36.27         | -8.41          | -27.07         | 0.73 | 3                | 3                | GU735858  |
| ttAST.8b    | 54.29        | 54.29        | -311.93        | -266.36        | -229.72        | 0.74 | 2                | 1                | GU735859  |
| ttAST.8c    | 54.29        | 48.57        | -311.93        | -282.56        | -274.75        | 0.74 | 2                | 1                | GU735860  |
| ttAST.9a    | 54.29        | 45.71        | -144.19        | -234.79        | -56.35         | 0.75 | 1                | 1                | GU735861  |
| ttAST.9b    | 54.29        | 48.57        | -144.19        | -228.60        | -56.99         | 0.75 | 2                | 1                | GU735862  |
| ttAST.9c    | 54.29        | 45.71        | -167.72        | -237.71        | -56.35         | 0.75 | 2                | 1                | GU735863  |
| ttAST.10a   | 54.29        | 51.43        | -63.75         | -118.12        | -71.52         | 0.77 | 1                | 1                | GU735864  |
| ttAST.10c   | 54.29        | 48.57        | -50.57         | -134.05        | -40.38         | 0.77 | 0                | 1                | GU735865  |
| ttAST.11a   | 54.29        | 51.43        | -215.23        | -249.52        | -412.60        | 0.75 | 0                | 1                | GU735866  |
| ttAST.11b   | 54.29        | 51.43        | -207.72        | -258.41        | -342.00        | 0.75 | 0                | 1                | GU735867  |
| ttAST.11c   | 54.29        | 51.43        | -195.82        | -241.05        | -342.00        | 0.75 | 0                | 1                | GU735868  |
| ttAST.12a   | 54.29        | 45.71        | -46.85         | -151.80        | -239.81        | 0.74 | 1                | 1                | GU735869  |
| ttAST.12b   | 54.29        | 42.86        | -46.85         | -160.47        | -228.95        | 0.74 | 1                | 1                | GU735870  |
| ttAST.13a   | 51.43        | 42.86        | -107.83        | -128.11        | -120.66        | 0.71 | 1                | 1                | GU735871  |
| ttAST.13b   | 51.43        | 42.86        | -107.83        | -151.31        | -120.66        | 0.71 | 1                | 1                | GU735872  |
| ttAST.14a   | 54.29        | 51.43        | -104.46        | -191.15        | -123.64        | 0.75 | 1                | 1                | GU735873  |
| ttAST.14b   | 54.29        | 48.57        | -102.81        | -188.06        | -120.10        | 0.74 | 2                | 1                | GU735874  |
| ttAST.15a   | 54.29        | 45.71        | -217.89        | -163.36        | -56.66         | 0.79 | 1                | 1                | GU735875  |
| ttAST.15b   | 54.29        | 42.86        | -206.39        | -145.70        | -97.83         | 0.79 | 1                | 1                | GU735876  |
| ttAST.16a   | 28.57        | 48.57        | -100.42        | -135.28        | -30.28         | 0.76 | 0                | 0                | GU735877  |
| ttAST.16b   | 28.57        | 48.57        | -92.22         | -135.09        | -30.28         | 0.76 | 0                | 0                | GU735878  |
| ttAST.17a   | 28.57        | 48.57        | -100.42        | -135.28        | -30.28         | 0.76 | 0                | 0                | GU735879  |
| ttAST.17b   | 28.57        | 48.57        | -92.22         | -135.09        | -30.28         | 0.76 | 0                | 0                | GU735880  |
| ttAST.18a   | 28.57        | 48.57        | -100.42        | -135.28        | -30.28         | 0.76 | 0                | 0                | GU735881  |
| ttAST.18b   | 28.57        | 48.57        | -92.22         | -135.09        | -30.28         | 0.76 | 0                | 0                | GU735882  |

|           |       |       |         |         |         |      |   |   |          |
|-----------|-------|-------|---------|---------|---------|------|---|---|----------|
| ttAST.19a | 34.29 | 48.57 | -54.93  | -133.79 | -30.28  | 0.76 | 0 | 0 | GU735883 |
| ttAST.19b | 37.14 | 48.57 | -62.13  | -133.96 | -30.28  | 0.76 | 0 | 0 | GU735884 |
| ttAST.19c | 37.14 | 48.57 | -58.13  | -134.34 | -30.28  | 0.76 | 0 | 0 | GU735885 |
| ttAST.20a | 42.86 | 48.57 | -50.73  | -133.69 | -30.28  | 0.75 | 1 | 1 | GU735886 |
| ttAST.20b | 45.71 | 48.57 | -95.29  | -135.70 | -30.28  | 0.75 | 1 | 1 | GU735887 |
| ttAST.20c | 45.71 | 48.57 | -57.42  | -133.53 | -30.28  | 0.76 | 2 | 1 | GU735888 |
| ttAST.21a | 51.43 | 51.43 | -59.95  | -153.82 | -58.38  | 0.66 | 1 | 1 | GU735889 |
| ttAST.21b | 51.43 | 51.43 | -59.95  | -156.10 | -52.73  | 0.66 | 1 | 1 | GU735890 |
| ttAST.21c | 51.43 | 54.29 | -59.95  | -147.52 | -61.87  | 0.66 | 1 | 1 | GU735891 |
| ttAST.22a | 45.71 | 48.57 | -59.83  | -133.91 | -30.28  | 0.75 | 2 | 1 | GU735892 |
| ttAST.22b | 45.71 | 48.57 | -91.44  | -133.97 | -30.28  | 0.75 | 1 | 1 | GU735893 |
| ttAST.22c | 51.43 | 48.57 | -59.29  | -133.19 | -30.28  | 0.75 | 2 | 1 | GU735894 |
| ttAST.23a | 45.71 | 48.57 | -59.83  | -133.91 | -30.28  | 0.75 | 2 | 1 | GU735895 |
| ttAST.23b | 51.43 | 48.57 | -68.28  | -133.97 | -30.28  | 0.75 | 1 | 1 | GU735896 |
| ttAST.23c | 45.71 | 48.57 | -55.03  | -133.97 | -30.28  | 0.75 | 1 | 1 | GU735897 |
| ttAST.24a | 45.71 | 48.57 | -61.51  | -134.01 | -30.28  | 0.75 | 2 | 1 | GU735898 |
| ttAST.24b | 45.71 | 48.57 | -54.60  | -133.53 | -30.28  | 0.75 | 1 | 1 | GU735899 |
| ttAST.24c | 51.43 | 48.57 | -87.94  | -136.19 | -30.28  | 0.75 | 1 | 1 | GU735900 |
| ttAST.25a | 54.29 | 22.86 | -97.37  | -140.38 | -77.55  | 0.51 | 0 | 0 | GU735901 |
| ttAST.25b | 54.29 | 22.86 | -97.37  | -142.14 | -126.91 | 0.51 | 0 | 0 | GU735902 |
| ttAST.26a | 54.29 | 28.57 | -97.37  | -138.18 | -30.15  | 0.51 | 0 | 0 | GU735903 |
| ttAST.26b | 54.29 | 28.57 | -97.37  | -141.91 | -118.06 | 0.51 | 0 | 1 | GU735904 |
| ttAST.27a | 54.29 | 42.86 | -97.37  | -144.47 | -183.45 | 0.52 | 0 | 1 | GU735905 |
| ttAST.27b | 54.29 | 40.00 | -97.37  | -141.20 | -105.70 | 0.51 | 0 | 0 | GU735906 |
| ttAST.28a | 31.43 | 54.29 | -85.28  | -138.91 | -42.22  | 0.51 | 0 | 0 | GU735907 |
| ttAST.28b | 31.43 | 54.29 | -85.77  | -139.31 | -42.22  | 0.51 | 0 | 0 | GU735908 |
| ttAST.29a | 34.29 | 54.29 | -66.85  | -136.72 | -42.22  | 0.51 | 0 | 0 | GU735909 |
| ttAST.29b | 40.00 | 54.29 | -69.95  | -137.15 | -42.22  | 0.51 | 0 | 0 | GU735910 |
| ttAST.30a | 51.43 | 54.29 | -98.07  | -138.31 | -42.22  | 0.51 | 1 | 0 | GU735911 |
| ttAST.30b | 48.57 | 54.29 | -77.46  | -137.30 | -42.22  | 0.51 | 1 | 0 | GU735912 |
| ttAST.31a | 54.29 | 54.29 | -97.37  | -137.72 | -42.22  | 0.51 | 0 | 0 | GU735913 |
| ttAST.31b | 54.29 | 54.29 | -97.77  | -157.43 | -69.07  | 0.54 | 0 | 1 | GU735914 |
| ttAST.32a | 31.43 | 22.86 | -64.63  | -171.86 | -37.39  | 0.50 | 0 | 0 | GU735915 |
| ttAST.32b | 31.43 | 22.86 | -64.63  | -213.21 | -32.81  | 0.50 | 0 | 0 | GU735916 |
| ttAST.33a | 42.86 | 37.14 | -67.65  | -91.44  | -16.03  | 0.52 | 2 | 1 | GU735917 |
| ttAST.33b | 45.71 | 42.86 | -64.56  | -106.59 | -14.39  | 0.52 | 2 | 1 | GU735918 |
| ttAST.34  | 54.29 | 57.14 | -97.37  | -146.27 | -269.89 | 0.51 | 0 | 0 | GU735919 |
| ttAST.35  | 54.29 | 57.14 | -97.37  | -141.14 | -160.71 | 0.51 | 0 | 0 | GU735920 |
| ttAST.36  | 54.29 | 54.29 | -97.37  | -137.55 | -37.11  | 0.51 | 0 | 1 | GU735921 |
| ttAST.37a | 51.43 | 54.29 | -323.29 | -147.32 | -42.22  | 0.51 | 2 | 1 | GU735922 |
| ttAST.37b | 54.29 | 54.29 | -246.82 | -144.83 | -42.22  | 0.51 | 3 | 1 | GU735923 |
| ttAST.38a | 54.29 | 54.29 | -188.20 | -141.76 | -42.22  | 0.51 | 3 | 0 | GU735924 |
| ttAST.38b | 54.29 | 54.29 | -214.54 | -143.12 | -42.22  | 0.51 | 2 | 1 | GU735925 |
| ttAST.39a | 54.29 | 54.29 | -99.97  | -137.68 | -42.22  | 0.51 | 0 | 0 | GU735926 |
| ttAST.39b | 54.29 | 54.29 | -131.00 | -139.11 | -42.22  | 0.51 | 3 | 1 | GU735927 |
| ttAST.40a | 48.57 | 22.86 | -82.70  | -87.38  | -9.87   | 0.52 | 1 | 1 | GU735928 |

|           |       |       |         |         |         |       |   |   |          |
|-----------|-------|-------|---------|---------|---------|-------|---|---|----------|
| ttAST.40b | 48.57 | 22.86 | -82.70  | -90.44  | -75.40  | 0.52  | 1 | 1 | GU735929 |
| ttAST.41a | 48.57 | 28.57 | -82.70  | -87.58  | -9.35   | 0.51  | 1 | 1 | GU735930 |
| ttAST.41b | 48.57 | 31.43 | -82.70  | -87.58  | -15.85  | 0.51  | 1 | 1 | GU735931 |
| ttAST.42a | 48.57 | 40.00 | -82.70  | -87.38  | -14.01  | 0.52  | 1 | 1 | GU735932 |
| ttAST.42b | 48.57 | 42.86 | -82.70  | -87.38  | -14.31  | 0.51  | 1 | 1 | GU735933 |
| ttAST.43a | 48.57 | 48.57 | -82.70  | -87.38  | -16.65  | 0.51  | 1 | 1 | GU735934 |
| ttAST.43b | 48.57 | 48.57 | -82.70  | -87.58  | -16.32  | 0.51  | 1 | 0 | GU735935 |
| ttAST.44a | 48.57 | 54.29 | -82.70  | -100.43 | -457.27 | 0.52  | 1 | 1 | GU735936 |
| ttAST.44b | 48.57 | 51.43 | -82.70  | -100.91 | -343.47 | 0.51  | 1 | 1 | GU735937 |
| ttAST.45a | 48.57 | 48.57 | -82.70  | -90.02  | -124.35 | 0.51  | 1 | 1 | GU735938 |
| ttAST.45b | 48.57 | 45.71 | -82.70  | -91.03  | -75.16  | 0.52  | 1 | 1 | GU735939 |
| ttAST.46a | 48.57 | 48.57 | -82.70  | -87.64  | -22.37  | 0.52  | 1 | 1 | GU735940 |
| ttAST.46b | 48.57 | 45.71 | -82.70  | -87.38  | -9.27   | 0.52  | 1 | 1 | GU735941 |
| ttAST.47a | 31.43 | 22.86 | -64.63  | -177.73 | -9.87   | 0.50  | 0 | 0 | GU735942 |
| ttAST.47b | 31.43 | 22.86 | -64.63  | -177.70 | -9.87   | 0.50  | 0 | 0 | GU735943 |
| ttAST.48a | 40.00 | 40.00 | -74.53  | -104.32 | -48.71  | 0.52  | 1 | 1 | GU735944 |
| ttAST.48b | 42.86 | 40.00 | -64.56  | -122.12 | -14.01  | 0.52  | 2 | 1 | GU735945 |
| ttAST.49a | 54.29 | 57.14 | -132.20 | -189.17 | -146.05 | 0.55  | 3 | 2 | GU735946 |
| ttAST.49b | 54.29 | 57.14 | -108.30 | -182.43 | -177.47 | 0.56  | 3 | 2 | GU735947 |
| ttAST.50a | 31.43 | 54.29 | -64.63  | -87.32  | -24.83  | 0.52  | 0 | 0 | GU735948 |
| ttAST.50b | 31.43 | 54.29 | -81.36  | -88.15  | -24.83  | 0.52  | 0 | 0 | GU735949 |
| ttAST.51a | 34.29 | 54.29 | -65.42  | -87.38  | -24.83  | 0.52  | 1 | 1 | GU735950 |
| ttAST.51b | 40.00 | 54.29 | -63.59  | -87.66  | -24.83  | 0.52  | 1 | 1 | GU735951 |
| ttAST.52a | 48.57 | 54.29 | -82.70  | -87.63  | -24.83  | 0.52  | 1 | 1 | GU735952 |
| ttAST.52b | 48.57 | 54.29 | -94.77  | -88.86  | -24.83  | 0.52  | 1 | 1 | GU735953 |
| ttAST.53a | 54.29 | 54.29 | -103.30 | -87.85  | -24.83  | 0.52  | 3 | 2 | GU735954 |
| ttAST.53b | 54.29 | 54.29 | -117.30 | -89.14  | -24.83  | 0.52  | 3 | 2 | GU735955 |
| ttAST.54a | 51.43 | 54.29 | -345.90 | -108.70 | -24.83  | 0.52  | 1 | 1 | GU735956 |
| ttAST.54b | 54.29 | 54.29 | -257.67 | -101.24 | -24.83  | 0.52  | 2 | 1 | GU735957 |
| ttAST.55a | 54.29 | 54.29 | -206.22 | -94.45  | -24.83  | 0.52  | 0 | 1 | GU735958 |
| ttAST.55b | 54.29 | 54.29 | -235.54 | -101.4  | -24.83  | 0.516 | 1 | 1 | GU735959 |
| ttAST.56a | 54.29 | 54.29 | -103.3  | -87.85  | -24.83  | 0.519 | 3 | 2 | GU735960 |
| ttAST.56b | 54.29 | 54.29 | -131.2  | -94.5   | -24.83  | 0.518 | 0 | 1 | GU735961 |
| ttAST.57a | 54.29 | 54.29 | -97.77  | -87.92  | -24.83  | 0.519 | 0 | 2 | GU735962 |
| ttAST.57b | 54.29 | 54.29 | -114.9  | -110.07 | -51.04  | 0.527 | 0 | 1 | GU735963 |
